# Supplementary material for: Synthesis of spiro(indoline-2,3′-hydropyridazine) via an “on-water” [4 + 2] annulation reaction
Source: Royal Society of Chemistry journal article supplement (doi:10.1039/d0qo01422b), 2020-12-22

## Synthesis of spiro(indoline-2,3'-hydropyridazine) *via* an “on-water”

### [4 + 2] annulation reaction

Wei-Fang Zuo,<sup>‡a</sup> Jin Zhou,<sup>‡a</sup> Yu-Ling Wu,<sup>a</sup> Hua-Ying Fang,<sup>a</sup> Xing-Jiang Lang,<sup>a</sup> Ya Li,<sup>a</sup>  
Gu Zhan<sup>\*a</sup> and Bo Han<sup>\*a</sup>

<sup>a</sup> *State Key Laboratory of Southwestern Chinese Medicine Resources, School of Pharmacy, Chengdu University of Traditional Chinese Medicine, Chengdu 611137, P.R. China. E-mail: zhangu@cdutcm.edu.cn; hanbo@cdutcm.edu.cn*

<sup>‡</sup> These authors contributed equally to this work

## Supporting Information

### Table of contents

|                                                              |    |
|--------------------------------------------------------------|----|
| 1. General methods.....                                      | 1  |
| 2. General procedure for synthesis of product <b>3</b> ..... | 2  |
| 3. Investigation of other substrates.....                    | 2  |
| 4. Analytical data of compounds <b>3</b> .....               | 3  |
| 5. X-ray crystal structure of <b>3z</b> .....                | 15 |
| 6. DFT Calculations.....                                     | 16 |
| 7. <sup>1</sup> H NMR and <sup>13</sup> C NMR Spectra.....   | 32 |

## 1. General methods

Nuclear magnetic resonance (NMR) spectra were recorded in CDCl<sub>3</sub> on Bruker 400, 600, 700 MHz, or JEOL 600 NMR instrument (at 400, 600 or 700 MHz for <sup>1</sup>H, and at 100, 150, or 175 MHz for <sup>13</sup>C). The <sup>1</sup>H NMR chemical shifts are reported in ppm with the internal TMS signal at 0.0 ppm as standard. The <sup>13</sup>C NMR chemical shifts were given using CDCl<sub>3</sub> as the internal standard (CDCl<sub>3</sub>: δ = 77.00 ppm). High-resolution mass spectra (HRMS) were obtained using Agilent P/N G1969-90010. High-resolution mass spectra were reported for the molecular ion [M+H]<sup>+</sup> or [M+Na]<sup>+</sup>. Melting points were recorded on BUCHI Melting Point M-565 instrument. X-ray diffraction experiment was carried out on an Agilent Gemini and the data obtained were deposited at the Cambridge Crystallographic Data Centre. UV detection was performed at 254 nm. TLC was performed on glass-backed silica plates; products were visualized using UV light. All reagents and solvents were obtained from commercial sources and used without further purification. 2-methyl-3H-indolium salt **1**<sup>[1]</sup> and (Z)-N<sup>1</sup>-(2-bromo-1-phenylethylidene) benzohydrazide **2**<sup>[2]</sup> were prepared according to the literature procedures.

### Reference

- [1]. Y. Zhang, M. Yang, C. Jia, Iodine-Promoted Domino Oxidative Cyclization for the One-Pot Synthesis of Novel Fused Four-Ring Quinoxaline Fluorophores by sp<sup>3</sup> CH Functionalization. *Chem. Eur. J.*, 2019, **25**, 13709.
- [2]. S. Gao, J. R. Chen, X. Q. Hu, Copper-Catalyzed Enantioselective Inverse Electron-Demand Hetero-Diels-Alder Reactions of Diazadienes with Enol Ethers: Efficient Synthesis of Chiral Pyridazines. *Adv. Synth. Catal.*, 2013, **355**, 3539.

## 2. General procedure for synthesis of product 3

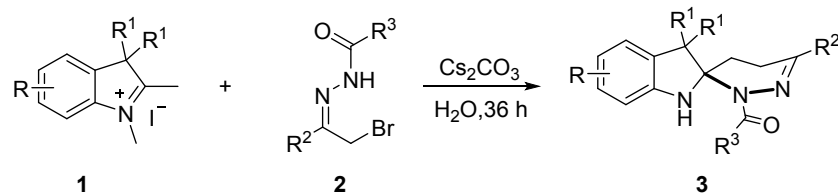

A mixture of 2-methyl-3*H*-indolium salt **1** (0.3 mmol), (*Z*)-*N'*-(2-bromo-1-phenylethylidene)benzohydrazide **2** (0.3 mmol), Cs<sub>2</sub>CO<sub>3</sub> (0.36 mmol) and water (3mL) was stirred at room temperature until the reaction completed (monitored by TLC). After the reaction finished, the pink solid **3** was obtained by simple filtration, dried, and further subjected to <sup>1</sup>H NMR, <sup>13</sup>C NMR, and HRMS analysis.

## 3. Investigation of other substrates

The 2-ethyl-1,3,3-trimethyl-3*H*-indol-1-ium iodide (**1j**), which bears the 2-ethyl group on the indoline ring was also tested. The reaction of **1j** with **2a** under the optimized conditions completed in 72 h, giving the desired product **3aj** in 50% yield with moderate diastereoselectivity (3:2 d.r.) after filtration and recrystallization (eq. 1). Besides, we also investigated the reaction of **1a** with (*Z*)-*N'*-(2-bromocyclo-hexylidene)benzohydrazide. Only a low conversion was observed in this reaction, which indicates that the alkyl substitution at the terminal site would significantly reduce the reaction activity (eq. 2).

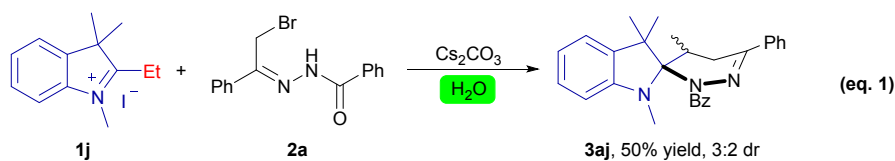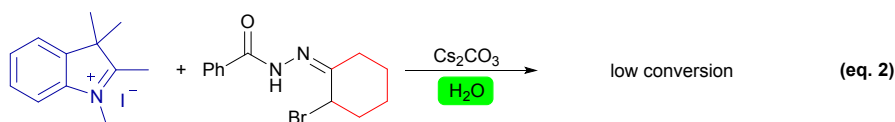

## 4. Analytical data of compounds 3

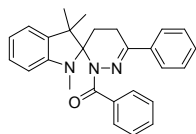

3a

### *phenyl(1,3,3-trimethyl-6'-phenyl-4',5'-dihydro-2'H-spiro[indoline-2,3'-pyridazin]-*

*2'-yl)methanone(3a)*: Yield (115.6mg, 94%); pink solid; m.p. 161.8-163.6 °C; <sup>1</sup>H NMR (700 MHz, CDCl<sub>3</sub>) δ (ppm) 7.59 (d, *J* = 6.3 Hz, 2H), 7.47 (dd, *J* = 7.0, 1.4 Hz, 2H), 7.39 (tt, *J* = 7.0, 1.4 Hz, 1H), 7.34 (t, *J* = 7.7 Hz, 2H), 7.30 – 7.27 (m, 3H), 7.14 (td, *J* = 7.7, 1.4 Hz, 1H), 7.00 (dd, *J* = 7.7, 1.4 Hz, 1H), 6.77 (td, *J* = 7.0, 0.7 Hz, 1H), 6.40 (d, *J* = 7.7 Hz, 1H), 3.08 (ddd, *J* = 18.2, 4.9, 2.1 Hz, 1H), 2.85-2.79 (m, 4H), 2.43 (ddd, *J* = 14.0, 5.6, 2.1 Hz, 1H), 2.39 (td, *J* = 14.0, 5.6, 1H), 1.40 (s, 3H), 1.33 (s, 3H). <sup>13</sup>C NMR (175 MHz, CDCl<sub>3</sub>) δ (ppm) 170.9, 149.7, 142.0, 136.4, 136.4, 135.7, 128.8, 128.4, 127.9, 127.4, 126.3, 126.2, 124.1, 118.5, 116.6, 103.6, 86.4, 47.2, 27.6, 26.4, 24.2, 22.9, 21.8. HRMS (ESI-TOF): *m/z* calculated for C<sub>27</sub>H<sub>27</sub>N<sub>3</sub>O [M+Na]<sup>+</sup>: 432.2046, found: 432.2050.

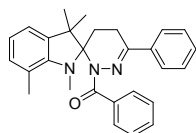

3b

### *phenyl(1,3,3,7-tetramethyl-6'-phenyl-4',5'-dihydro-2'H-spiro[indoline-2,3'-pyridazin]-2'-yl)methanone(3b)*

*z*in]-2'-yl)methanone(3b): Yield (113.1mg, 89%); pink solid; m.p. 160.0-162.2 °C; <sup>1</sup>H NMR (600 MHz, CDCl<sub>3</sub>) δ (ppm) 7.59 (d, *J* = 9.0 Hz, 2H), 7.47 (dt, *J* = 7.8, 1.8 Hz, 2H), 7.40 (t, *J* = 7.8 Hz, 1H), 7.35 (t, *J* = 7.2 Hz, 2H), 7.31 – 7.26 (m, 3H), 6.85 (dd, *J* = 7.8, 1.8 Hz, 2H), 6.69 (t, *J* = 7.2 Hz, 1H), 3.10 (s, 3H), 3.07 (ddd, *J* = 18.0, 5.4, 2.4 Hz, 1H), 2.79 (ddd, *J* = 17.4, 13.8, 5.4 Hz, 1H), 2.45 (s, 3H), 2.42 (ddd, *J* = 14.4, 6.9, 2.4 Hz, 1H), 2.33 (td, *J* = 14.4, 5.4 Hz, 1H), 1.35 (s, 3H), 1.32 (s, 3H). <sup>13</sup>C NMR (150 MHz, CDCl<sub>3</sub>) δ (ppm) 171.0, 147.6, 142.1, 137.1, 136.6, 135.8, 130.1, 128.7, 128.3, 127.9, 127.4, 126.2, 124.1, 117.0, 116.5, 114.6, 87.1, 46.3, 31.1, 26.9, 24.2, 23.1, 21.9, 19.0. HRMS (ESI-TOF): *m/z* calculated for C<sub>28</sub>H<sub>29</sub>N<sub>3</sub>O [M+Na]<sup>+</sup>: 446.2203, found: 446.2206

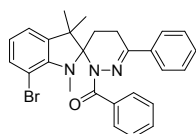

3c

### *(7-bromo-1,3,3-trimethyl-6'-phenyl-4',5'-dihydro-2'H-spiro[indoline-2,3'-pyridazin]-2'-yl)(phenyl)methanone(3c)*

*n*]-2'-yl)(phenyl)methanone(3c): Yield (139.5mg, 95%); pink solid; m.p. 182.7-183.7 °C; <sup>1</sup>H NMR (600 MHz, CDCl<sub>3</sub>) δ (ppm) 7.60 (d, *J* = 7.2 Hz, 2H), 7.47 (d, *J* = 6.0 Hz, 2H), 7.42 (t, *J* = 7.2 Hz, 1H), 7.36 (t, *J* = 7.8 Hz, 2H), 7.31 – 7.26 (m, 3H), 7.23 (d, *J* = 7.8 Hz, 1H), 6.90 (d, *J* = 6.6 Hz, 1H), 6.62 (t, *J* = 7.8 Hz, 1H), 3.22 (s, 3H), 3.08 (ddd, *J* = 18.0, 5.4, 1.8 Hz, 1H), 2.75 (ddd, *J* = 18.0, 14.4, 5.4 Hz, 1H), 2.43 (ddd, *J* = 14.4, 5.4, 2.4 Hz, 1H), 2.34 (td, *J* = 14.4, 5.4 Hz, 1H), 1.35 (s, 3H), 1.33 (s, 3H). <sup>13</sup>C NMR (150 MHz, CDCl<sub>3</sub>) δ (ppm) 171.0, 146.3, 142.4, 140.4, 136.2, 135.6, 131.7, 128.9, 128.3, 128.0, 127.4, 126.3, 124.1, 118.3, 117.5, 97.9, 86.9, 46.4, 31.1, 26.9, 24.1, 22.9, 21.7. HRMS (ESI-TOF): *m/z* calculated for C<sub>27</sub>H<sub>26</sub>Br<sup>79</sup>N<sub>3</sub>O [M+H]<sup>+</sup>: 488.1332, found: 488.1331; calculated for C<sub>27</sub>H<sub>26</sub>Br<sup>81</sup>N<sub>3</sub>O

[M+H]<sup>+</sup>: 490.1312, found:490.1316.

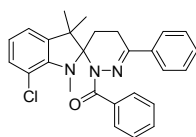

3d

**(7-chloro-1,3,3-trimethyl-6'-phenyl-4',5'-dihydro-2'H-spiro[indoline-2,3'-pyridazin]-2'-yl)(phenyl)methanone(3d)**

***nj*-2'-yl)(phenyl)methanone(3d)**: Yield (104.9mg, 79%); pink solid; m.p. 168.1-171.9 °C; <sup>1</sup>H NMR (600 MHz, CDCl<sub>3</sub>) δ ( ppm ) 7.60 (dd, *J* = 8.4, 1.2 Hz, 2H), 7.47 (dd, *J* = 7.8, 1.8 Hz, 2H), 7.41 (t, *J* = 7.8 Hz, 1H), 7.36 (t, *J* = 7.8 Hz, 2H), 7.31 – 7.26 (m, 3H), 7.03 (dd, *J* = 7.8, 1.2 Hz, 1H), 6.86 (dd, *J* = 7.2, 1.2 Hz, 1H), 6.68 (t, *J* = 7.8 Hz, 1H), 3.21 (s, 3H), 3.08 (ddd, *J* = 18.0, 5.4, 2.4 Hz, 1H), 2.76 (ddd, *J* = 17.4, 13.8, 5.4 Hz, 1H), 2.43 (ddd, *J* = 14.4, 5.4, 2.4 Hz, 1H), 2.34 (td, *J* = 13.8, 5.4 Hz, 1H), 1.35 (s, 3H), 1.33 (s, 3H). <sup>13</sup>C NMR (150 MHz, CDCl<sub>3</sub>) δ ( ppm ) 171.0, 144.9, 142.3, 140.0, 136.2, 135.6, 128.9, 128.5, 128.4, 128.0, 127.4, 126.3, 124.1, 117.9, 117.0, 110.8, 86.9, 46.6, 30.7, 26.9, 24.0, 23.0, 21.7. HRMS (ESI-TOF): *m/z* calculated for C<sub>27</sub>H<sub>26</sub>ClN<sub>3</sub>O [M+Na]<sup>+</sup>: 466.1657, found: 466.1652.

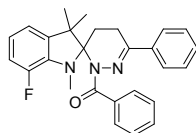

3e

**(7-fluoro-1,3,3-trimethyl-6'-phenyl-4',5'-dihydro-2'H-spiro[indoline-2,3'-pyridazin]-2'-yl)(phenyl)methanone(3e)**

***nj*-2'-yl)(phenyl)methanone(3e)**: Yield (81.2mg, 63%); pink solid; m.p. 174.4-176.7 °C; <sup>1</sup>H NMR (600 MHz, CDCl<sub>3</sub>) δ ( ppm ) 7.60 (d, *J* = 6.6 Hz, 2H), 7.48 – 7.46 (m, 2H), 7.41 (t, *J* = 7.2 Hz, 1H), 7.36 (t, *J* = 7.8 Hz, 2H), 7.32 – 7.27 (m, 3H), 6.85 (dd, *J* = 12.6, 8.4 Hz, 1H), 6.78 (d, *J* = 7.8 Hz, 1H), 6.67 (td, *J* = 7.8, 3.6 Hz, 1H), 3.10 – 3.06 (m, 4H), 3.05 (ddd, *J* = 18.0, 13.8, 6.0 Hz, 1H), 2.42 (ddd, *J* = 13.8, 5.4, 1.8 Hz, 1H), 2.36 (td, *J* = 13.8, 4.8 Hz, 1H), 1.37 (s, 3H), 1.33 (s, 3H). <sup>13</sup>C NMR (150 MHz, CDCl<sub>3</sub>) δ ( ppm ) 171.1, 146.7, 145.1, 142.3, 140.2(d, *J*<sub>C,F</sub> = 24.0 Hz), 136.4, 136.0(d, *J*<sub>C,F</sub> = 30.0 Hz), 135.6, 128.8, 128.3, 128.0, 127.4, 126.2, 124.1, 116.9(d, *J*<sub>C,F</sub> = 24.0 Hz), 114.3(d, *J*<sub>C,F</sub> = 6.0 Hz), 114.0(d, *J*<sub>C,F</sub> = 84.0 Hz), 86.8, 47.8, 29.6, 29.6, 26.5, 23.7, 22.9, 21.7. HRMS (ESI-TOF): *m/z* calculated for C<sub>27</sub>H<sub>26</sub>FN<sub>3</sub>O [M+Na]<sup>+</sup>: 450.1952, found: 450.1956.

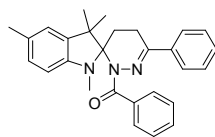

3f

**phenyl(1,3,3,5-tetramethyl-6'-phenyl-4',5'-dihydro-2'H-spiro[indoline-2,3'-pyridazin]-2'-yl)methanone(3f)**

***nj*-2'-yl)methanone(3f)**: Yield (113.6mg, 89%); pink solid; m.p. 146.8-148.3 °C; <sup>1</sup>H NMR (700 MHz, CDCl<sub>3</sub>) δ ( ppm ) 7.60 – 7.59 (m, 2H), 7.48 – 7.45 (m, 2H), 7.41 – 7.38 (m, 1H), 7.35 – 7.33 (m, 2H), 7.31 – 7.27 (m, 3H), 6.93 (ddd, *J* = 7.7, 1.4, 0.7 Hz, 1H), 6.81 (d, *J* = 2.1 Hz, 1H), 6.30 (d, *J* = 7.7 Hz, 1H), 3.07 (ddd, *J* = 17.5, 4.9, 2.1 Hz, 1H), 2.85 – 2.78 (m, 4H), 2.41 (ddd, *J* = 14.0, 5.6, 2.1 Hz, 1H), 2.37 (td, *J* = 14.0, 4.9 Hz, 1H), 2.31 (s, 3H), 1.39 (s, 3H), 1.32 (s, 3H). <sup>13</sup>C NMR (175 MHz, CDCl<sub>3</sub>) δ ( ppm ) 170.9, 147.6, 142.0, 136.5, 136.4, 135.8, 128.7, 128.4, 127.9, 127.4, 126.6, 126.6, 126.2, 125.4, 124.1, 119.7, 103.3, 86.8, 47.3, 27.8, 26.5, 24.3, 22.9, 21.8, 20.1. HRMS (ESI-TOF): *m/z* calculated for C<sub>28</sub>H<sub>29</sub>N<sub>3</sub>O [M+Na]<sup>+</sup>: 446.2203, found: 446.2207.

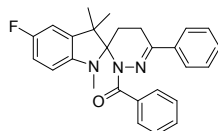

3g

**(5-fluoro-1,3,3-trimethyl-6'-phenyl-4',5'-dihydro-2'H-spiro[indoline-2,3'-pyridazin]-2'-yl)(phenyl)methanone(3g):**

Yield (109.8mg, 86%); pink solid; m.p. 163.5-165.0 °C; <sup>1</sup>H NMR (600 MHz, CDCl<sub>3</sub>) δ ( ppm ) 7.58 (dd, *J* = 7.2, 1.8 Hz, 2H), 7.46 (dd, *J* = 7.8, 1.8 Hz, 2H), 7.42 – 7.39 (m, 1H), 7.35 (t, *J* = 7.8 Hz, 2H), 7.31 – 7.27 (m, 3H), 6.80 (ddd, *J* = 9.6, 8.4, 2.4 Hz, 1H), 6.73 (dd, *J* = 8.4, 3.0 Hz, 1H), 6.25 (dd, *J* = 9.8, 4.9 Hz, 1H), 3.08 (ddd, *J* = 18.0, 5.4, 2.4 Hz, 1H), 2.82 – 2.76 (m, 4H), 2.42 (ddd, *J* = 13.8, 5.4, 1.8 Hz, 1H), 2.36 (td, *J* = 13.8, 5.4 Hz, 1H), 1.39 (s, 3H), 1.31 (s, 3H). <sup>13</sup>C NMR (150 MHz, CDCl<sub>3</sub>) δ ( ppm ) 171.1, 156.2, 154.7, 145.9, 142.2, 137.8(d, *J*<sub>C,F</sub> = 30.0 Hz), 136.3, 135.6, 128.9, 128.4, 128.0, 127.4, 126.2, 124.1, 111.7(d, *J*<sub>C,F</sub> = 90.0 Hz), 106.8(d, *J*<sub>C,F</sub> = 96.0 Hz), 103.1(d, *J*<sub>C,F</sub> = 36.0 Hz), 86.8, 47.3, 27.9, 26.3, 24.4, 22.7, 21.8. HRMS (ESI-TOF): *m/z* calculated for C<sub>27</sub>H<sub>26</sub>FN<sub>3</sub>O [M+Na]<sup>+</sup>: 450.1952, found: 450.1957.

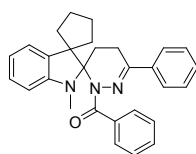

3h

**(1-methyl-6''-phenyl-4'',5''-dihydro-2''H-dispiro[cyclopentane-1,3'-indoline-2',3''-pyridazin]-2''-yl)(phenyl)methanone(3h):**

Yield (125.0mg, 96%); pink solid; m.p. 153.4-154.8 °C; <sup>1</sup>H NMR (600 MHz, CDCl<sub>3</sub>) δ ( ppm ) 7.56 (d, *J* = 6.6 Hz, 2H), 7.48 (dt, *J* = 7.8, 1.8 Hz, 2H), 7.39 (t, *J* = 7.2 Hz, 1H), 7.33 (t, *J* = 7.8 Hz, 2H), 7.30 – 7.27 (m, 3H), 7.14 (t, *J* = 7.8 Hz, 1H), 7.06 (d, *J* = 7.2 Hz, 1H), 6.73 (t, *J* = 7.8 Hz, 1H), 6.40 (d, *J* = 7.8 Hz, 1H), 3.07 (ddd, *J* = 18.0, 4.8, 3.0 Hz, 1H), 2.84 (s, 3H), 2.72 (ddd, *J* = 18.0, 13.2, 7.2 Hz, 1H), 2.45 – 2.37 (m, 2H), 2.17 – 2.09 (m, 3H), 2.03 – 1.98 (m, 1H), 1.92 – 1.86 (m, 1H), 1.81 – 1.73 (m, 1H), 1.70 – 1.63 (m, 2H). <sup>13</sup>C NMR (150 MHz, CDCl<sub>3</sub>) δ ( ppm ) 170.7, 149.4, 142.1, 138.0, 136.5, 135.7, 128.6, 128.3, 127.9, 127.4, 126.1, 124.2, 119.5, 116.4, 103.2, 85.4, 59.3, 35.7, 34.0, 27.9, 25.4, 23.4, 22.7, 21.2. HRMS (ESI-TOF): *m/z* calculated for C<sub>29</sub>H<sub>29</sub>N<sub>3</sub>O [M+Na]<sup>+</sup>: 458.2203, found: 458.2208.

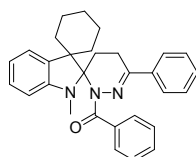

3i

**(1-methyl-6''-phenyl-4'',5''-dihydro-2''H-dispiro[cyclohexane-1,3'-indoline-2',3''-pyridazin]-2''-yl)(phenyl)methanone(3i):**

Yield (127.0mg, 94%); pink solid; m.p. 153.1-154.5 °C; <sup>1</sup>H NMR (600 MHz, CDCl<sub>3</sub>) δ ( ppm ) 7.58 – 7.55 (m, 2H), 7.49 – 7.47 (m, 3H), 7.40 – 7.37 (m, 1H), 7.34 – 7.32 (m, 2H), 7.30 – 7.27 (m, 3H), 7.16 (td, *J* = 7.8, 1.2 Hz, 1H), 6.74 (td, *J* = 7.2, 1.2 Hz, 1H), 6.42 (dd, *J* = 7.8, 0.6 Hz, 1H), 3.08 (ddd, *J* = 18.0, 5.4, 1.8 Hz, 1H), 2.92 (ddd, *J* = 18.0, 14.4, 5.4 Hz, 1H), 2.81 (s, 3H), 2.48 (ddd, *J* = 14.4, 5.4, 2.4 Hz, 1H), 2.36 (td, *J* = 14.4, 5.4 Hz, 1H), 2.14 – 2.05 (m, 2H), 1.97 – 1.91 (m, 1H), 1.90 – 1.87 (m, 1H), 1.82 (td, *J* = 12.0, 3.0 Hz, 1H), 1.66 (dt, *J* = 13.8, 3.6 Hz, 2H), 1.60 (d, *J* = 12.6 Hz, 1H), 1.27 – 1.25 (m, 1H), 1.24 – 1.18 (m, 1H). <sup>13</sup>C NMR (150 MHz, CDCl<sub>3</sub>) δ ( ppm ) 171.1, 150.6, 141.5, 136.6, 135.8, 134.8, 128.6, 128.3, 127.9, 127.4, 126.1, 124.1, 122.9, 115.7, 103.7, 87.4, 50.0, 32.6, 30.9, 27.9, 24.5, 23.8, 21.9, 21.7, 20.0. HRMS (ESI-TOF): *m/z* calculated for

C<sub>30</sub>H<sub>31</sub>N<sub>3</sub>O [M+Na]<sup>+</sup> : 472.2359, found: 472.2360.

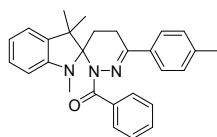

3j

***phenyl(1,3,3-trimethyl-6'-(p-tolyl)-4',5'-dihydro-2'H-spiro[indoline-2,3'-pyridazin]-2'-yl)methanone(3j)***

***phenyl(1,3,3-trimethyl-6'-(p-tolyl)-4',5'-dihydro-2'H-spiro[indoline-2,3'-pyridazin]-2'-yl)methanone(3j)*** : Yield (116.9mg, 92%); pink solid; m.p. 147.5-149.4 °C; <sup>1</sup>H NMR (700 MHz, CDCl<sub>3</sub>) δ ( ppm ) 7.58 (d, *J* = 7.0 Hz, 2H), 7.38 (t, *J* = 7.7 Hz, 1H), 7.36 (d, *J* = 7.7 Hz, 2H), 7.32 (t, *J* = 7.7 Hz, 2H), 7.14 (td, *J* = 7.7, 14 Hz, 1H), 7.09 (d, *J* = 7.7 Hz, 2H), 6.99 (dd, *J* = 7.7, 1.4 Hz, 1H), 6.76 (td, *J* = 7.7, 1.4 Hz, 1H), 6.40 (d, *J* = 7.7 Hz, 1H), 3.06 (ddd, *J* = 18.2, 4.9, 2.1 Hz, 1H), 2.82 (s, 3H), 2.79 (ddd, *J* = 18.2, 13.3, 6.3 Hz, 1H), 2.43 – 2.35 (m, 2H), 2.32 (s, 3H), 1.39 (s, 3H), 1.33 (s, 3H). <sup>13</sup>C NMR (175 MHz, CDCl<sub>3</sub>) δ ( ppm ) 170.9, 149.8, 142.1, 138.0, 136.5, 136.4, 133.0, 128.6, 128.4, 128.1, 126.3, 126.1, 124.1, 118.5, 116.5, 103.6, 86.4, 47.2, 27.7, 26.4, 24.2, 22.9, 21.8, 20.2. HRMS (ESI-TOF): *m/z* calculated for C<sub>28</sub>H<sub>29</sub>N<sub>3</sub>O [M+Na]<sup>+</sup> : 446.2203, found: 446.2206

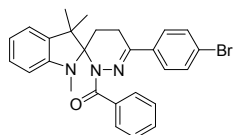

3k

***(6'-(4-bromophenyl)-1,3,3-trimethyl-4',5'-dihydro-2'H-spiro[indoline-2,3'-pyridazin]-2'-yl)methanone(3k)***

***(6'-(4-bromophenyl)-1,3,3-trimethyl-4',5'-dihydro-2'H-spiro[indoline-2,3'-pyridazin]-2'-yl)methanone(3k)*** : Yield (134.5mg, 92%); pink solid; m.p. 144.6-147.0 °C; <sup>1</sup>H NMR (700 MHz, CDCl<sub>3</sub>) δ ( ppm ) 7.55 (dd, *J* = 7.7, 1.4 Hz, 2H), 7.41 – 7.38 (m, 3H), 7.33 (t, *J* = 8.4 Hz, 2H), 7.31 (td, *J* = 9.1, 2.1 Hz, 2H), 7.14 (td, *J* = 7.7, 1.4 Hz, 1H), 7.00 (dd, *J* = 7.0, 1.4 Hz, 1H), 6.77 (td, *J* = 7.7, 1.4 Hz, 1H), 6.40 (d, *J* = 7.7 Hz, 1H), 3.03 (ddd, *J* = 18.2, 5.6, 2.1 Hz, 1H), 2.82 (s, 3H), 2.78 (ddd, *J* = 18.2, 14.0, 5.6 Hz, 1H), 2.42 (ddd, *J* = 14.0, 5.6, 2.1 Hz, 1H), 2.38 (td, *J* = 14.0, 5.6 Hz, 1H), 1.38 (s, 3H), 1.31 (s, 3H). <sup>13</sup>C NMR (175 MHz, CDCl<sub>3</sub>) δ ( ppm ) 170.8, 149.6, 140.9, 136.3, 136.3, 134.7, 130.5, 130.5, 128.9, 128.3, 126.4, 126.2, 125.7, 122.2, 118.5, 116.7, 103.6, 86.5, 47.3, 27.6, 26.3, 24.1, 22.8, 21.7. HRMS (ESI-TOF): *m/z* calculated for C<sub>27</sub>H<sub>26</sub>Br<sup>79</sup>N<sub>3</sub>O [M+Na]<sup>+</sup> : 510.1151, found: 510.1157; calculated for C<sub>27</sub>H<sub>26</sub>Br<sup>81</sup>N<sub>3</sub>O [M+Na]<sup>+</sup> : 512.1131, found 510.1135.

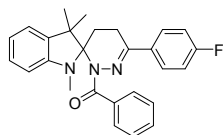

3l

***(6'-(4-fluorophenyl)-1,3,3-trimethyl-4',5'-dihydro-2'H-spiro[indoline-2,3'-pyridazin]-2'-yl)methanone(3l)***

***(6'-(4-fluorophenyl)-1,3,3-trimethyl-4',5'-dihydro-2'H-spiro[indoline-2,3'-pyridazin]-2'-yl)methanone(3l)*** : Yield (121.6mg, 95%); pink solid; m.p. 147.5-152.0 °C; <sup>1</sup>H NMR (600 MHz, CDCl<sub>3</sub>) δ ( ppm ) 7.56 (d, *J* = 7.2 Hz, 2H), 7.45 – 7.42 (m, 2H), 7.41 – 7.38 (m, 1H), 7.33 (t, *J* = 7.8 Hz, 2H), 7.14 (td, *J* = 7.8, 1.2 Hz, 1H), 7.00 (dd, *J* = 7.2, 1.2 Hz, 1H), 6.96 (t, *J* = 8.4 Hz, 2H), 6.77 (td, *J* = 7.2, 1.2 Hz, 1H), 6.40 (d, *J* = 7.8 Hz, 1H), 3.04 (ddd, *J* = 18.0, 5.4, 2.4 Hz, 1H), 2.82 (s, 3H), 2.80 – 2.76 (m, 1H), 2.44 – 2.35 (m, 2H), 1.39 (s, 3H), 1.32 (s, 3H). <sup>13</sup>C NMR (150 MHz, CDCl<sub>3</sub>) δ ( ppm ) 171.9, 164.0, 162.4, 150.7, 142.1, 137.4(d, *J*<sub>C,F</sub> = 60.0 Hz), 133.90, 129.8, 129.3, 127.4, 127.2, 127.0(d, *J*<sub>C,F</sub> = 36.0 Hz), 119.5, 117.7, 115.4(d, *J*<sub>C,F</sub> = 90.0 Hz), 104.7, 87.4, 48.3, 28.7, 27.4, 25.2, 23.9,

22.9. HRMS (ESI-TOF):  $m/z$  calculated for  $C_{27}H_{26}N_3O$   $[M+Na]^+$  : 450.1952, found: 450.1957.

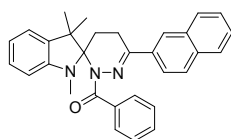

3m

**phenyl(1,3,3-trimethyl-6'-(naphthalen-2-yl)-4',5'-dihydro-2'H-spiro[indoline-2,**

**3'-pyridazin]-2'-yl)methanone(3m):** Yield (119.4mg, 87%); pink solid; m.p. 153.0-154.1 °C;  $^1H$  NMR (600 MHz,  $CDCl_3$ )  $\delta$  ( ppm ) 7.95 (s, 1H), 7.81 – 7.77 (m, 2H), 7.67 (d,  $J$  = 9.0 Hz, 1H), 7.64 (d,  $J$  = 7.2 Hz, 2H), 7.56 (d,  $J$  = 9.0 Hz, 1H), 7.50 – 7.46 (m, 2H), 7.44 (t,  $J$  = 7.8 Hz, 1H), 7.38 (t,  $J$  = 7.2 Hz, 2H), 7.16 (t,  $J$  = 7.8 Hz, 1H), 7.02 (d,  $J$  = 6.6 Hz, 1H), 6.79 (t,  $J$  = 7.8 Hz, 1H), 6.43 (d,  $J$  = 7.8 Hz, 1H), 3.25 (ddd,  $J$  = 18.0, 5.4, 3.0 Hz, 1H), 2.94 (ddd,  $J$  = 18.0, 13.2, 6.0 Hz, 1H), 2.87 (s, 3H), 2.50 – 2.42 (m, 2H), 1.44 (s, 3H), 1.37 (s, 3H).  $^{13}C$  NMR (150 MHz,  $CDCl_3$ )  $\delta$  ( ppm ) 170.9, 149.7, 142.0, 136.5, 136.4, 133.3, 132.5, 132.0, 128.8, 128.4, 127.3, 127.1, 126.6, 126.4, 126.2, 125.6, 125.3, 123.8, 121.7, 118.5, 116.6, 103.6, 86.6, 47.3, 27.7, 26.4, 24.2, 22.9, 21.7. HRMS (ESI-TOF):  $m/z$  calculated for  $C_{31}H_{29}N_3O$   $[M+Na]^+$  : 482.2203, found: 482.2205.

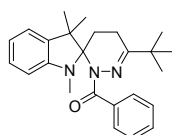

3n

**(6'-(tert-butyl)-1,3,3-trimethyl-4',5'-dihydro-2'H-spiro[indoline-2,3'-pyridazin]-2'-yl)**

**(phenyl)methanone(3n):** Yield (72.1mg, 62%); pink solid; m.p. 151.9-154.0 °C;  $^1H$  NMR (700 MHz,  $CDCl_3$ )  $\delta$  ( ppm ) 7.45 – 7.44 (m, 2H), 7.30 – 7.27 (m, 1H), 7.25 – 7.24 (m, 2H), 7.11 (td,  $J$  = 7.7, 1.4 Hz, 1H), 6.97 (dd,  $J$  = 7.0, 1.4 Hz, 1H), 6.74 (td,  $J$  = 7.7, 1.4 Hz, 1H), 6.36 (dd,  $J$  = 7.7, 0.7 Hz, 1H), 2.78 (s, 3H), 2.62 (ddd,  $J$  = 18.2, 4.9, 2.1 Hz, 1H), 2.34 (ddd,  $J$  = 17.5, 14.0, 4.9 Hz, 1H), 2.26 (ddd,  $J$  = 14.0, 5.6, 1.4 Hz, 1H), 2.14 (td,  $J$  = 14.0, 4.9 Hz, 1H), 1.32 (s, 3H), 1.28 (s, 3H), 0.97 (s, 9H).  $^{13}C$  NMR (175 MHz,  $CDCl_3$ )  $\delta$  ( ppm ) 171.06, 153.30, 149.87, 137.08, 136.48, 127.97, 127.88, 126.24, 125.81, 118.31, 118.30, 116.35, 103.47, 85.79, 47.10, 37.03, 27.62, 26.70, 26.48, 24.56, 22.87, 19.91. HRMS (ESI-TOF):  $m/z$  calculated for  $C_{25}H_{31}N_3O$   $[M+H]^+$  : 390.2540, found: 390.2539.

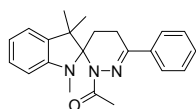

3o

**1-(1,3,3-trimethyl-6'-phenyl-4',5'-dihydro-2'H-spiro[indoline-2,3'-pyridazin]-2'-**

**yl)ethan-1-one(3o) :** Yield (89.5mg, 86%); pink solid; m.p. 161.5-162.4 °C;  $^1H$  NMR (700 MHz,  $CDCl_3$ )  $\delta$  ( ppm ) 7.78 (d,  $J$  = 7.0 Hz, 2H), 7.44 – 7.41 (m, 2H), 7.40 (t,  $J$  = 7.0 Hz, 1H), 7.13 (t,  $J$  = 7.7 Hz, 1H), 6.92 (d,  $J$  = 7.0 Hz, 1H), 6.71 (t,  $J$  = 7.7 Hz, 1H), 6.40 (d,  $J$  = 7.7 Hz, 1H), 3.05 (ddd,  $J$  = 17.5, 4.9, 2.1 Hz, 1H), 2.76-2.71 (m, 4H), 2.38 (s, 3H), 2.33 (ddd,  $J$  = 14.0, 4.9, 2.1 Hz, 1H), 2.24 (td,  $J$  = 14.0, 5.6 Hz, 1H), 1.32 (s, 3H), 1.19 (s, 3H).  $^{13}C$  NMR (175 MHz,  $CDCl_3$ )  $\delta$  ( ppm ) 172.9, 150.0, 143.1, 136.3, 136.0, 128.1, 127.5, 126.4, 124.2, 118.2, 116.3, 103.8, 86.7, 47.0, 27.9, 26.5, 24.3, 23.7, 22.6, 21.7. HRMS (ESI-TOF):  $m/z$  calculated for  $C_{22}H_{25}N_3O$   $[M+Na]^+$  : 370.4512, found: 370.4517.



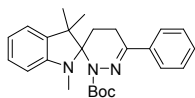

**3p** *tert-butyl(1,3,3-trimethyl-6'-phenyl-4',5'-dihydro-2'H-spiro[indoline-2,3'-pyridazine]-2'-carboxylate(3p)*

**azine]-2'-carboxylate(3p)** : Yield (103.4mg, 85%); pink solid; m.p. 137.9-139.0 °C; <sup>1</sup>H NMR (600 MHz, CDCl<sub>3</sub>) δ ( ppm ) 7.83 (d, *J* = 7.2 Hz, 2H), 7.40 – 7.37(m, 2H), 7.34 (t, *J* = 7.2 Hz, 1H), 7.08 (t, *J* = 7.2 Hz, 1H), 6.92 (d, *J* = 7.2 Hz, 1H), 6.67 (t, *J* = 7.2 Hz, 1H), 6.32 (d, *J* = 7.8 Hz, 1H), 3.00 (ddd, *J* = 18.0, 5.4, 2.4 Hz, 1H), 2.78 (s, 3H), 2.71 (ddd, *J* = 18.0, 13.8, 5.4 Hz, 1H), 2.28 (ddd, *J* = 14.4, 6.0, 2.4 Hz, 1H), 2.21 (td, *J* = 13.8, 5.4 Hz, 1H), 1.33 (s, 3H), 1.27 (s, 3H), 1.23 (s, 9H). <sup>13</sup>C NMR (150 MHz, CDCl<sub>3</sub>) δ ( ppm ) 153.9, 150.0, 143.8, 137.9, 137.5, 128.8, 128.5, 127.4, 125.4, 120.2, 117.1, 104.8, 86.8, 81.5, 48.5, 28.6, 28.3, 27.9, 26.3, 24.1, 23.1. HRMS (ESI-TOF): *m/z* calculated for C<sub>25</sub>H<sub>31</sub>N<sub>3</sub>O<sub>2</sub> [M+Na]<sup>+</sup> : 428.2308, found: 428.2312.

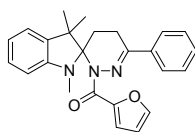

**3q** *furan-2-yl(1,3,3-trimethyl-6'-phenyl-4',5'-dihydro-2'H-spiro[indoline-2,3'-pyridazine]-2'-yl)methanone(3q)*

**in]-2'-yl)methanone(3q)** : Yield (114.2mg, 95%); pink solid; m.p. 137.1-139.7 °C; <sup>1</sup>H NMR (700 MHz, CDCl<sub>3</sub>) δ ( ppm ) 7.73 (d, *J* = 6.3 Hz, 2H), 7.52 (s, 1H), 7.44 – 7.42 (m, 2H), 7.41 – 7.39 (m, 1H), 7.13 (d, *J* = 4.2 Hz, 1H), 7.12 (dd, *J* = 7.7, 1.4 Hz, 1H), 6.95 (d, *J* = 7.0 Hz, 1H), 6.73 (t, *J* = 7.0 Hz, 1H), 6.47 (dd, *J* = 3.5, 1.4 Hz, 1H), 6.41 (d, *J* = 7.7 Hz, 1H), 3.13 (ddd, *J* = 18.2, 4.9, 2.1 Hz, 1H), 2.82 (ddd, *J* = 18.2, 13.3, 6.3 Hz, 1H), 2.77 (s, 3H), 2.43 – 2.36 (m, 2H), 1.37 (s, 3H), 1.29 (s, 3H). <sup>13</sup>C NMR (175 MHz, CDCl<sub>3</sub>) δ ( ppm ) 159.5, 149.7, 147.0, 144.2, 143.7, 136.1, 136.0, 128.2, 127.6, 126.4, 124.7, 118.5, 118.0, 116.5, 110.3, 103.9, 87.2, 47.4, 27.8, 26.5, 24.3, 22.8, 22.1. HRMS (ESI-TOF): *m/z* calculated for C<sub>25</sub>H<sub>25</sub>N<sub>3</sub>O<sub>2</sub> [M+Na]<sup>+</sup> : 422.1839, found: 422.1843.

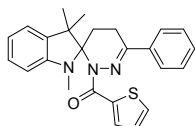

**3r** *thiophen-2-yl(1,3,3-trimethyl-6'-phenyl-4',5'-dihydro-2'H-spiro[indoline-2,3'-pyridazine]-2'-yl)methanone(3r)*

**dazin]-2'-yl)methanone(3r)** : Yield (108.2mg, 87%); pink solid; m.p. 156.4-157.2 °C; <sup>1</sup>H NMR (700 MHz, CDCl<sub>3</sub>) δ ( ppm ) 7.97 (dd, *J* = 3.5, 1.4 Hz, 1H), 7.86 – 7.84 (m, 2H), 7.52 (dd, *J* = 4.9, 1.4 Hz, 1H), 7.47 – 7.44 (m, 2H), 7.44 – 7.42 (m, 1H), 7.17 (td, *J* = 7.7, 0.7 Hz, 1H), 7.01 (dd, *J* = 5.6, 4.2 Hz, 1H), 6.98 (dd, *J* = 7.0, 1.4 Hz, 1H), 6.77 (td, *J* = 7.0, 0.7 Hz, 1H), 6.43 (dd, *J* = 7.7, 0.7 Hz, 1H), 3.17 (ddd, *J* = 18.2, 4.9, 2.1 Hz, 1H), 2.82 (ddd, *J* = 18.2, 13.3, 6.3 Hz, 1H), 2.77 (s, 3H), 2.43 – 2.36 (m, 2H), 1.38 (s, 3H), 1.31 (s, 3H). <sup>13</sup>C NMR (175 MHz, CDCl<sub>3</sub>) δ ( ppm ) 162.2, 149.7, 145.0, 136.4, 135.6, 134.8, 134.8, 133.9, 132.7, 128.3, 127.4, 126.4, 125.8, 124.9, 118.5, 118.5, 116.5, 103.6, 87.2, 47.4, 27.9, 26.7, 24.6, 22.9, 22.7. HRMS (ESI-TOF): *m/z* calculated for C<sub>25</sub>H<sub>25</sub>N<sub>3</sub>OS [M+Na]<sup>+</sup> : 438.1611, found: 438.1616.

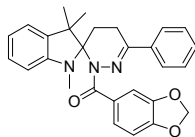

3s

**benzo[d][1,3]dioxol-5-yl(1,3,3-trimethyl-6'-phenyl-4',5'-dihydro-2'H-spiro[indoli**

**ne-2,3'-pyridazin]-2'-yl)methanone(3s)** : Yield (104.7mg, 77%); pink solid; m.p. 136.3-138.4 °C; <sup>1</sup>H NMR (600 MHz, CDCl<sub>3</sub>) δ ( ppm ) 7.54 (dd, *J* = 7.2, 3.6 Hz, 2H), 7.33-7.31 (m, 3H), 7.21 (dt, *J* = 8.4, 1.8 Hz, 1H), 7.14 (t, *J* = 1.8 Hz, 1H), 7.12 (dd, *J* = 7.8, 1.2 Hz, 1H), 6.99 (d, *J* = 7.2 Hz, 1H), 6.77 (t, *J* = 8.4 Hz, 2H), 6.37 (d, *J* = 7.8 Hz, 1H), 5.99 (dd, *J* = 6.6, 1.2 Hz, 2H), 3.08 (ddd, *J* = 18.0, 5.4, 2.4 Hz, 1H), 2.83 (ddd, *J* = 18.0, 13.8, 6.0 Hz, 1H), 2.78 (s, 3H), 2.42 – 2.34 (m, 2H), 1.38 (s, 3H), 1.30 (s, 3H). <sup>13</sup>C NMR (150 MHz, CDCl<sub>3</sub>) δ ( ppm ) 170.7, 150.7, 149.1, 146.7, 142.8, 137.5, 136.8, 130.8, 129.0, 128.5, 127.3, 125.2, 125.1, 119.5, 117.6, 110.6, 107.1, 104.5, 101.3, 87.4, 48.3, 28.6, 27.4, 25.2, 23.9, 23.0. HRMS (ESI-TOF): *m/z* calculated for C<sub>28</sub>H<sub>27</sub>N<sub>3</sub>O<sub>3</sub> [M+Na]<sup>+</sup> : 476.1945, found: 476.1947.

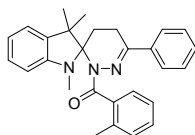

3t

**o-tolyl(1,3,3-trimethyl-6'-phenyl-4',5'-dihydro-2'H-spiro[indoline-2,3'-pyridazin]-**

**2'-yl)methanone(3t)** : Yield (116.9mg, 92%); pink solid; m.p. 190.3-191.3 °C; <sup>1</sup>H NMR (700 MHz, CDCl<sub>3</sub>) δ ( ppm ) 7.29 (d, *J* = 7.0 Hz, 2H), 7.27 (d, *J* = 7.0 Hz, 1H), 7.23 (d, *J* = 7.7 Hz, 2H), 7.22 – 7.21 (m, 1H), 7.16 (t, *J* = 7.7 Hz, 2H), 7.13 – 7.11 (m, 2H), 7.00 (dd, *J* = 7.0, 1.4 Hz, 1H), 6.77 (t, *J* = 7.7 Hz, 1H), 6.45 (d, *J* = 7.7 Hz, 1H), 3.05 (ddd, *J* = 17.5, 4.9, 2.1 Hz, 1H), 2.92 (s, 3H), 2.75 (ddd, *J* = 18.2, 14.0, 5.6 Hz, 1H), 2.40 (ddd, *J* = 14.0, 5.6, 2.1 Hz, 1H), 2.33 (td, *J* = 14.0, 4.9 Hz, 1H), 2.27 (s, 3H), 1.39 (s, 3H), 1.36 (s, 3H). <sup>13</sup>C NMR (175 MHz, CDCl<sub>3</sub>) δ ( ppm ) 172.5, 149.8, 142.8, 138.9, 136.2, 135.6, 132.7, 128.3, 127.9, 127.3, 126.8, 126.5, 125.6, 124.0, 123.9, 118.5, 116.6, 103.9, 86.8, 47.3, 28.2, 26.5, 24.2, 22.8, 21.6, 19.1. HRMS (ESI-TOF): *m/z* calculated for C<sub>28</sub>H<sub>29</sub>N<sub>3</sub>O [M+Na]<sup>+</sup> : 446.2203, found: 446.2207

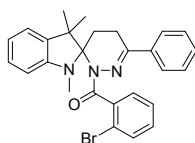

3u

**(2-bromophenyl)(1,3,3-trimethyl-6'-phenyl-4',5'-dihydro-2'H-spiro[indoline-2,3'-**

**pyridazin]-2'-yl)methanone(3u)**: Yield (131.1mg, 89%); pink solid; m.p. 185.2-186.2 °C; <sup>1</sup>H NMR (700 MHz, CDCl<sub>3</sub>) δ ( ppm ) 7.54 (dd, *J* = 9.1, 1.4 Hz, 1H), 7.32 (d, *J* = 7.0 Hz, 2H), 7.27 – 7.22 (m, 4H), 7.19 – 7.15 (m, 3H), 6.99 (dd, *J* = 7.7, 1.4 Hz, 1H), 6.76 (t, *J* = 7.7 Hz, 1H), 6.47 (d, *J* = 7.7 Hz, 1H), 3.07 (dt, *J* = 18.2, 3.5 Hz, 1H), 2.99 (s, 3H), 2.80 – 2.75 (m, 1H), 2.43 – 2.36 (m, 2H), 1.38 (s, 3H), 1.36 (s, 3H). <sup>13</sup>C NMR (175 MHz, CDCl<sub>3</sub>) δ ( ppm ) 169.8, 149.8, 143.6, 140.8, 135.9, 135.6, 130.8, 128.0, 127.3, 126.6, 125.8, 124.1, 118.5, 118.0, 116.5, 104.1, 87.1, 47.4, 28.7, 26.4, 23.8, 22.7, 21.8. HRMS (ESI-TOF): *m/z* calculated for C<sub>27</sub>H<sub>26</sub>Br<sup>79</sup>N<sub>3</sub>O [M+H]<sup>+</sup> : 488.1332, found: 488.1333; calculated for C<sub>27</sub>H<sub>26</sub>Br<sup>81</sup>N<sub>3</sub>O [M+H]<sup>+</sup> : 490.1312, found: 490.1311.

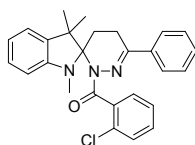

**3v** **(2-chlorophenyl)(1,3,3-trimethyl-6'-phenyl-4',5'-dihydro-2'H-spiro[indoline-2,3'-pyridazin]-2'-yl)methanone (3v)**: Yield (116.1mg, 87%); pink solid; m.p. 177.8-178.3 °C; <sup>1</sup>H NMR (700 MHz, CDCl<sub>3</sub>) δ (ppm) 7.36 (dt, *J* = 8.4, 0.7 Hz, 1H), 7.31 (dt, *J* = 7.0, 1.4 Hz, 2H), 7.29 – 7.26 (m, 2H), 7.25 – 7.23 (m, 2H), 7.22 – 7.21 (m, 2H), 7.15 (td, *J* = 7.7, 1.4 Hz, 1H), 6.99 (dd, *J* = 7.7, 1.4 Hz, 1H), 6.76 (td, *J* = 7.7, 1.4 Hz, 1H), 6.45 (d, *J* = 7.7 Hz, 1H), 3.06 (dt, *J* = 18.2, 3.5 Hz, 1H), 2.95 (s, 3H), 2.76 (dt, *J* = 18.2, 9.1 Hz, 1H), 2.38 (dd, *J* = 9.8, 3.5 Hz, 2H), 1.38 (s, 3H), 1.35 (s, 3H). <sup>13</sup>C NMR (175 MHz, CDCl<sub>3</sub>) δ (ppm) 169.2, 149.8, 143.6, 138.6, 136.0, 135.6, 129.0, 128.0, 127.6, 127.3, 126.5, 125.3, 124.1, 118.5, 116.6, 104.0, 87.2, 47.3, 28.3, 26.4, 23.9, 22.7, 21.8. HRMS (ESI-TOF): *m/z* calculated for C<sub>27</sub>H<sub>26</sub>ClN<sub>3</sub>O [M+Na]<sup>+</sup>: 466.1657, found: 466.1654.

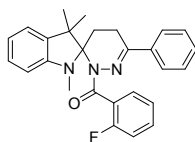

**3w** **(2-fluorophenyl)(1,3,3-trimethyl-6'-phenyl-4',5'-dihydro-2'H-spiro [indoline-2,3'-pyridazin]-2'-yl)methanone(3w)**: Yield (121.0mg, 94%); pink solid; m.p. 176.3-178.6 °C; <sup>1</sup>H NMR (400 MHz, CDCl<sub>3</sub>) δ (ppm) 7.39 – 7.38 (m, 1H), 7.37 – 7.36 (m, 2H), 7.35 – 7.33 (m, 1H), 7.30 – 7.27 (m, 1H), 7.26 – 7.22 (m, 2H), 7.14 (td, *J* = 7.6, 1.2 Hz, 1H), 7.11 (td, *J* = 7.6, 0.8 Hz, 1H), 7.06 – 7.01 (m, 1H), 6.99 (dd, *J* = 7.2, 1.2 Hz, 1H), 6.76 (td, *J* = 7.6, 1.2 Hz, 1H), 6.42 (d, *J* = 7.6 Hz, 1H), 3.05 (ddd, *J* = 17.6, 4.8, 2.4 Hz, 1H), 2.86 (s, 3H), 2.77 (ddd, *J* = 18.0, 13.2, 6.0 Hz, 1H), 2.43 – 2.31 (m, 2H), 1.38 (s, 3H), 1.33 (s, 3H). <sup>13</sup>C NMR (100 MHz, CDCl<sub>3</sub>) δ (ppm) 167.7, 158.5, 156.0, 149.8, 143.5, 135.9(d, *J*<sub>C,F</sub> = 188.0 Hz), 129.7(d, *J*<sub>C,F</sub> = 32.0 Hz), 128.5(d, *J*<sub>C,F</sub> = 16.0 Hz), 128.0, 127.3, 126.4, 124.1, 122.8(d, *J*<sub>C,F</sub> = 12.0 Hz), 118.5, 116.6, 113.6(d, *J*<sub>C,F</sub> = 92.0 Hz), 103.7, 87.2, 47.2, 28.7, 27.7, 26.5, 24.0, 22.8, 21.8. HRMS (ESI-TOF): *m/z* calculated for C<sub>27</sub>H<sub>26</sub>FN<sub>3</sub>O [M+Na]<sup>+</sup>: 450.1952, found: 450.1956.

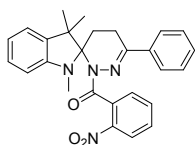

**3x** **(2-nitrophenyl)(1,3,3-trimethyl-6'-phenyl-4',5'-dihydro-2'H-spiro[indoline-2,3'-pyridazin]-2'-yl)methanone(3x)**: Yield (113.5mg, 83%); pink solid; m.p. 172.1-174.1 °C; <sup>1</sup>H NMR (400 MHz, CDCl<sub>3</sub>) δ (ppm) 8.18 (dd, *J* = 8.0, 1.2 Hz, 1H), 7.65 (td, *J* = 7.6, 1.6 Hz, 1H), 7.53 (td, *J* = 8.4, 1.6 Hz, 1H), 7.38 (dd, *J* = 7.6, 1.2 Hz, 1H), 7.35 – 7.31 (m, 2H), 7.30 – 7.27 (m, 3H), 7.23 (dd, *J* = 7.6, 1.2 Hz, 1H), 7.05 (dd, *J* = 7.2, 1.2 Hz, 1H), 6.82 (td, *J* = 7.2, 0.8 Hz, 1H), 6.56 (d, *J* = 7.6 Hz, 1H), 3.13 – 3.07 (m, 4H), 2.79 (ddd, *J* = 18.0, 11.6, 0.8 Hz, 1H), 2.51 – 2.40 (m, 2H), 1.42 (s, 6H). <sup>13</sup>C NMR (100 MHz, CDCl<sub>3</sub>) δ (ppm) 168.4, 149.8, 144.6, 144.4, 135.7, 135.4, 135.1, 132.7, 128.3, 127.7, 127.5, 127.3, 126.7, 124.0, 122.3, 118.5, 116.5, 104.3, 87.7, 47.7, 28.7, 28.3, 26.4, 23.7, 22.4, 21.9. HRMS (ESI-TOF): *m/z* calculated for C<sub>27</sub>H<sub>26</sub>N<sub>4</sub>O<sub>3</sub> [M+Na]<sup>+</sup>: 477.1897, found: 477.1904.

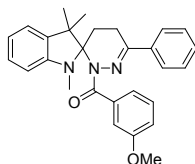

**3y**      **(3-methoxyphenyl)(1,3,3-trimethyl-6'-phenyl-4',5'-dihydro-2'H-spiro[indoline-**

**2,3'-pyridazin]-2'-yl)methanone(3y):** Yield (108.9mg, 83%); pink solid; m.p. 167.7-169.0 °C; <sup>1</sup>H NMR (700 MHz, CDCl<sub>3</sub>) δ ( ppm ) 7.50 – 7.48 (m, 2H), 7.31 – 7.27 (m, 3H), 7.24 (d, *J* = 8.4 Hz, 1H), 7.18 (d, *J* = 7.0 Hz, 1H), 7.15 – 7.13 (m, 2H), 7.00 (dd, *J* = 7.0, 1.4 Hz, 1H), 6.95 (ddd, *J* = 8.4, 2.8, 1.4 Hz, 1H), 6.78 (td, *J* = 7.7, 0.7 Hz, 1H), 6.40 (d, *J* = 7.7 Hz, 1H), 3.77 (s, 3H), 3.08 (ddd, *J* = 17.5, 4.9, 2.1 Hz, 1H), 2.86 – 2.80 (m, 4H), 2.42 (ddd, *J* = 14.0, 6.3, 2.8 Hz, 1H), 2.39 (td, *J* = 14.0, 4.9 Hz, 1H), 1.40 (s, 3H), 1.33 (s, 3H). <sup>13</sup>C NMR (175 MHz, CDCl<sub>3</sub>) δ ( ppm ) 170.6, 157.9, 149.7, 142.0, 136.4, 135.8, 127.9, 127.4, 126.9, 126.4, 124.2, 121.1, 118.5, 116.6, 115.4, 113.2, 103.6, 86.5, 54.4, 47.2, 27.6, 26.4, 24.2, 22.9, 21.9. HRMS (ESI-TOF): *m/z* calculated for C<sub>28</sub>H<sub>29</sub>N<sub>3</sub>O<sub>2</sub> [M+Na]<sup>+</sup> : 462.2152, found: 462.2157.

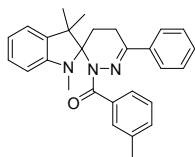

**3z**      ***m*-tolyl(1,3,3-trimethyl-6'-phenyl-4',5'-dihydro-2'H-spiro[indoline-2,3'-pyridazin]-**

**2'-yl)methanone(3z):** Yield (112.8mg, 89%); pink solid; m.p. 164.3-166.4 °C; <sup>1</sup>H NMR (700 MHz, CDCl<sub>3</sub>) δ ( ppm ) 7.50 – 7.49 (m, 2H), 7.44 – 7.43 (m, 1H), 7.40 – 7.39 (m, 1H), 7.31 – 7.27 (m, 3H), 7.24 – 7.20 (m, 2H), 7.14 (td, *J* = 7.7, 1.4 Hz, 1H), 7.00 (dd, *J* = 7.7, 1.4 Hz, 1H), 6.77 (td, *J* = 7.0, 0.7 Hz, 1H), 6.40 (dd, *J* = 8.4, 1.4 Hz, 1H), 3.08 (ddd, *J* = 18.2, 4.9, 2.1 Hz, 1H), 2.85 – 2.80 (m, 4H), 2.42 (ddd, *J* = 14.0, 6.3, 2.1 Hz, 1H), 2.39 (td, *J* = 14.0, 5.6 Hz, 1H), 2.34 (s, 3H), 1.40 (s, 3H), 1.33 (s, 3H). <sup>13</sup>C NMR (150 MHz, CDCl<sub>3</sub>) δ ( ppm ) 171.0, 149.8, 141.9, 136.4, 136.2, 135.9, 135.9, 129.5, 129.2, 127.9, 127.4, 126.3, 125.9, 125.7, 124.1, 118.5, 116.6, 103.6, 86.4, 47.2, 27.7, 26.4, 24.2, 22.9, 21.8, 20.2. HRMS (ESI-TOF): *m/z* calculated for C<sub>28</sub>H<sub>29</sub>N<sub>3</sub>O [M+Na]<sup>+</sup> : 446.2203, found: 446.2204.

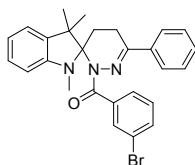

**3aa**      **(3-bromophenyl)(1,3,3-trimethyl-6'-phenyl-4',5'-dihydro-2'H-spiro[indoline-2,3'-**

**pyridazin]-2'-yl)methanone(3aa):** Yield (126.1mg, 86%); pink solid; m.p. 158.3-159.2 °C; <sup>1</sup>H NMR (700 MHz, CDCl<sub>3</sub>) δ ( ppm ) 7.76 (t, *J* = 1.4 Hz, 1H), 7.54 – 7.47 (m, 4H), 7.34 – 7.30 (m, 3H), 7.22 (t, *J* = 7.7 Hz, 1H), 7.16 (td, *J* = 7.7, 1.4 Hz, 1H), 7.00 (dd, *J* = 7.7, 1.4 Hz, 1H), 6.78 (td, *J* = 7.7, 1.4 Hz, 1H), 6.41 (d, *J* = 7.7 Hz, 1H), 3.10 (ddd, *J* = 17.5, 4.9, 2.1 Hz, 1H), 2.86 – 2.80 (m, 4H), 2.43 (ddd, *J* = 14.0, 5.6, 2.1 Hz, 1H), 2.39 (td, *J* = 14.0, 4.9 Hz, 1H), 1.40 (s, 3H), 1.32 (s, 3H). <sup>13</sup>C NMR (175 MHz, CDCl<sub>3</sub>) δ ( ppm ) 169.2, 149.6, 143.1, 138.3, 136.2, 135.5, 131.6, 131.5, 128.2, 127.8, 127.8, 127.5, 127.0, 126.4, 124.2, 120.1, 118.5, 116.7, 103.7, 86.8, 47.3, 27.7, 26.4, 24.1, 22.8, 21.8. HRMS (ESI-TOF): *m/z* calculated for C<sub>27</sub>H<sub>26</sub>Br<sup>79</sup>N<sub>3</sub>O [M+H]<sup>+</sup> : 488.1332, found: 480.1331; calculated for C<sub>27</sub>H<sub>26</sub>Br<sup>81</sup>N<sub>3</sub>O [M+H]<sup>+</sup> : 490.1312, found: 490.1318.

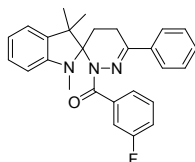

**3ab** (3-fluorophenyl)(1,3,3-trimethyl-6'-phenyl-4',5'-dihydro-2'H-spiro[indoline-2,3'-

*pyridazin]-2'-yl)methanone(3ab):* Yield (99.8mg, 78%); pink solid; m.p. 151.7-153.3 °C; <sup>1</sup>H NMR (600 MHz, CDCl<sub>3</sub>) δ ( ppm ) 7.49 – 7.46 (m, 2H), 7.37 – 7.34 (m, 1H), 7.33 – 7.28 (m, 5H), 7.15 (t, *J* = 7.8 Hz, 1H), 7.10 (t, *J* = 8.4 Hz, 1H), 7.00 (d, *J* = 7.2 Hz, 1H), 6.78 (t, *J* = 7.8 Hz, 1H), 6.41 (d, *J* = 7.8 Hz, 1H), 3.10 (ddd, *J* = 18.0, 5.4, 2.4 Hz, 1H), 2.85 – 2.79 (m, 4H), 2.45 – 2.35 (m, 2H), 1.39 (s, 3H), 1.32 (s, 3H). <sup>13</sup>C NMR (150 MHz, CDCl<sub>3</sub>) δ ( ppm ) 170.6, 162.7, 161.1, 150.7, 143.9, 137.3, 136.5, 129.2, 128.8(d, *J*<sub>C,F</sub> = 30.0 Hz), 128.5, 127.5, 125.2, 125.0(d, *J*<sub>C,F</sub> = 12.0 Hz), 119.6, 117.7, 116.5(d, *J*<sub>C,F</sub> = 48.0 Hz), 116.5(d, *J*<sub>C,F</sub> = 228.0 Hz), 104.7, 87.7, 48.3, 28.7, 27.4, 25.2, 23.9, 22.9. HRMS (ESI-TOF): *m/z* calculated for C<sub>27</sub>H<sub>26</sub>FN<sub>3</sub>O [M+Na]<sup>+</sup>: 450.1952, found: 450.1955.

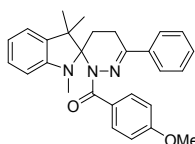

**3ac** (4-methoxyphenyl)(1,3,3-trimethyl-6'-phenyl-4',5'-dihydro-2'H-spiro[indoline-2,3'-

*pyridazin]-2'-yl)methanone(3ac):* Yield (121.6mg, 92%); pink solid; m.p. 148.1-149.2 °C; <sup>1</sup>H NMR (700 MHz, CDCl<sub>3</sub>) δ ( ppm ) 7.64 (d, *J* = 9.1 Hz, 2H), 7.55 (d, *J* = 3.5 Hz, 1H), 7.54 (d, *J* = 2.8 Hz, 1H), 7.31 (d, *J* = 3.5 Hz, 1H), 7.30 (d, *J* = 2.8 Hz, 2H), 7.13 (td, *J* = 7.7, 1.4 Hz, 1H), 6.99 (dd, *J* = 7.0, 1.4 Hz, 1H), 6.85 (dd, *J* = 7.7, 1.4 Hz, 2H), 6.77 (t, *J* = 7.0 Hz, 1H), 6.38 (d, *J* = 7.7 Hz, 1H), 3.84 (s, 3H), 3.08 (ddd, *J* = 18.2, 5.6, 2.1 Hz, 1H), 2.83 (ddd, *J* = 17.5, 13.3, 5. Hz, 1H), 2.78 (s, 3H), 2.43 – 2.41 (m, 1H), 2.39 (td, *J* = 14.0, 4.9 Hz, 1H), 1.39 (s, 3H), 1.31 (s, 3H). <sup>13</sup>C NMR (175 MHz, CDCl<sub>3</sub>) δ ( ppm ) 170.0, 160.1, 149.7, 141.4, 136.5, 135.9, 131.0, 128.1, 127.8, 127.4, 126.3, 124.1, 118.5, 116.5, 111.4, 103.4, 86.2, 54.3, 47.3, 27.6, 26.3, 24.3, 22.9, 21.9. HRMS (ESI-TOF): *m/z* calculated for C<sub>28</sub>H<sub>29</sub>N<sub>3</sub>O<sub>2</sub> [M+Na]<sup>+</sup>: 462.2152, found: 462.2157.

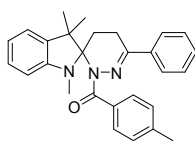

**3ad** *p*-tolyl(1,3,3-trimethyl-6'-phenyl-4',5'-dihydro-2'H-spiro[indoline-2,3'-pyridazin]-

*2'-yl)methanone(3ad):* Yield (119.1mg, 94%); pink solid; m.p. 149.8-152.2 °C; <sup>1</sup>H NMR (600 MHz, CDCl<sub>3</sub>) δ ( ppm ) 7.50 – 7.50 (m, 4H), 7.31 – 7.29 (m, 3H), 7.15 – 7.12 (m, 3H), 6.99 (dd, *J* = 7.2, 1.2 Hz, 1H), 6.77 (td, *J* = 7.2, 1.2 Hz, 1H), 6.38 (d, *J* = 7.8 Hz, 1H), 3.08 (ddd, *J* = 18.0, 5.4, 2.4 Hz, 1H), 2.86 – 2.79 (m, 4H), 2.42 (ddd, *J* = 14.4, 6.6, 2.4 Hz, 1H), 2.40 – 2.35 (m, 4H), 1.39 (s, 3H), 1.32 (s, 3H). <sup>13</sup>C NMR (150 MHz, CDCl<sub>3</sub>) δ ( ppm ) 171.7, 150.8, 142.7, 140.1, 137.5, 136.9, 134.2, 129.9, 128.8, 128.4, 127.9, 127.3, 125.2, 119.5, 117.6, 104.5, 87.3, 48.3, 28.6, 27.4, 25.3, 23.9, 22.9, 21.5. HRMS (ESI-TOF): *m/z* calculated for C<sub>28</sub>H<sub>29</sub>N<sub>3</sub>O [M+Na]<sup>+</sup>: 446.2203, found: 446.2205.

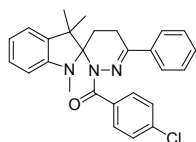

**3ae** (4-chlorophenyl)(1,3,3-trimethyl-6'-phenyl-4',5'-dihydro-2'H-spiro [indoline-2,3'-

pyridazin]-2'-yl)methanone(**3ae**): Yield (115.7mg, 87%); pink solid; m.p. 137.8-139.3 °C; <sup>1</sup>H NMR (700 MHz, CDCl<sub>3</sub>) δ ( ppm ) 7.56 – 7.54 (m, 2H), 7.50 – 7.48 (m, 2H), 7.33 – 7.31 (m, 5H), 7.15 (td, *J* = 7.7, 1.4 Hz, 1H), 7.00 (dd, *J* = 7.0, 1.4 Hz, 1H), 6.78 (td, *J* = 7.7, 0.7 Hz, 1H), 6.40 (d, *J* = 7.7 Hz, 1H), 3.10 (ddd, *J* = 17.5, 4.9, 2.1 Hz, 1H), 2.85 – 2.79 (m, 4H), 2.43 (ddd, *J* = 14.7, 6.3, 2.8 Hz, 1H), 2.38 (td, *J* = 14.0, 4.9 Hz, 1H), 1.39 (s, 3H), 1.32 (s, 3H). <sup>13</sup>C NMR (175 MHz, CDCl<sub>3</sub>) δ ( ppm ) 170.68, 150.65, 143.70, 137.32, 136.54, 135.79, 131.03, 131.01, 129.16, 128.52, 127.45, 127.42, 125.14, 119.52, 117.70, 104.60, 87.64, 48.29, 28.64, 27.40, 25.18, 23.86, 22.88. HRMS (ESI-TOF): *m/z* calculated for C<sub>27</sub>H<sub>26</sub>ClN<sub>3</sub>O [M+Na]<sup>+</sup>: 466.1657, found: 466.1660.

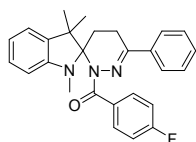

**3af** (4-fluorophenyl)(1,3,3-trimethyl-6'-phenyl-4',5'-dihydro-2'H-spiro [indoline-2,3'-

pyridazin]-2'-yl)methanone(**3af**): Yield (115.6mg, 90%); pink solid; m.p. 169.6-172.1 °C; <sup>1</sup>H NMR (700 MHz, CDCl<sub>3</sub>) δ ( ppm ) 7.64 – 7.61 (m, 2H), 7.50 – 7.49 (m, 2H), 7.33 – 7.29 (m, 3H), 7.14 (td, *J* = 7.0, 1.4 Hz, 1H), 7.02 (t, *J* = 8.4 Hz, 2H), 7.00 (dd, *J* = 7.7, 1.4 Hz, 1H), 6.78 (td, *J* = 7.7, 0.7 Hz, 1H), 6.40 (d, *J* = 7.7 Hz, 1H), 3.10 (ddd, *J* = 17.5, 4.9, 2.1 Hz, 1H), 2.85 – 2.78 (m, 4H), 2.43 (ddd, *J* = 14.0, 6.3, 2.1 Hz, 1H), 2.38 (td, *J* = 14.0, 4.9 Hz, 1H), 1.39 (s, 3H), 1.32 (s, 3H). <sup>13</sup>C NMR (175 MHz, CDCl<sub>3</sub>) δ ( ppm ) 169.6, 163.3, 161.9, 149.6, 142.4, 136.3, 135.6, 132.3(d, *J*<sub>C,F</sub> = 14.0 Hz), 130.9(d, *J*<sub>C,F</sub> = 28.0 Hz), 128.1, 127.5, 126.4, 124.1, 118.5, 116.7, 113.2(d, *J*<sub>C,F</sub> = 84.0 Hz), 103.5, 86.5, 47.3, 27.6, 26.4, 24.2, 22.9, 21.9. HRMS (ESI-TOF): *m/z* calculated for C<sub>27</sub>H<sub>26</sub>FN<sub>3</sub>O [M+Na]<sup>+</sup>: 450.1952, found: 450.1954.

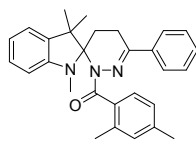

**3ag** (2,4-dimethylphenyl)(1,3,3-trimethyl-6'-phenyl-4',5'-dihydro-2'H-spiro[indoline-2,

3'-pyridazin]-2'-yl)methanone(**3ag**): Yield (125.4mg, 96%); pink solid; m.p. 181.7-183.2 °C; <sup>1</sup>H NMR (600 MHz, CDCl<sub>3</sub>) δ ( ppm ) 7.33 – 7.31 (m, 2H), 7.26 – 7.22 (m, 3H), 7.14 (tt, *J* = 7.8, 1.2 Hz, 1H), 7.03 (d, *J* = 7.2 Hz, 1H), 6.98 (dt, *J* = 7.2, 1.2 Hz, 1H), 6.96 (s, 1H), 6.92 (d, *J* = 7.8 Hz, 1H), 6.75 (t, *J* = 7.2 Hz, 1H), 6.43 (d, *J* = 7.8 Hz, 1H), 3.04 (ddd, *J* = 18.0, 5.4, 1.8 Hz, 1H), 2.90 (s, 3H), 2.74 (ddd, *J* = 18.6, 14.4, 6.0 Hz, 1H), 2.39 (ddd, *J* = 13.8, 5.4, 1.8 Hz, 1H), 2.35 – 2.29 (m, 4H), 2.22 (s, 3H), 1.38 (s, 3H), 1.34 (s, 3H). <sup>13</sup>C NMR (150 MHz, CDCl<sub>3</sub>) δ ( ppm ) 173.6, 150.8, 143.5, 137.6, 137.3, 136.9, 136.7, 133.9, 130.1, 128.9, 128.4, 127.5, 126.9, 125.5, 125.0, 119.5, 117.5, 104.9, 87.7, 48.3, 29.2, 27.5, 25.3, 23.9, 22.7, 21.3, 20.2. HRMS (ESI-TOF): *m/z* calculated for C<sub>29</sub>H<sub>31</sub>N<sub>3</sub>O [M+Na]<sup>+</sup>: 460.2359, found: 460.2361.

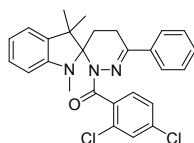

**3ah** (2,4-dichlorophenyl)(1,3,3-trimethyl-6'-phenyl-4',5'-dihydro-2'H-spiro[indoli ne-

**2,3'-pyridazin]-2'-yl)methanone(3ah):** Yield (115.8mg, 81%); pink solid; m.p. 172.9-173.7 °C; <sup>1</sup>H NMR (700 MHz, CDCl<sub>3</sub>) δ ( ppm ) 7.39 (d, *J* = 2.1 Hz, 1H), 7.34 – 7.33 (m, 2H), 7.32 – 7.30 (m, 1H), 7.29 – 7.27 (m, 2H), 7.21 (dd, *J* = 8.4, 2.1 Hz, 1H), 7.16 (td, *J* = 7.7, 1.4 Hz, 2H), 6.99 (dd, *J* = 7.7, 1.4 Hz, 1H), 6.76 (td, *J* = 7.7, 1.4 Hz, 1H), 6.45 (dd, *J* = 7.7, 0.7 Hz, 1H), 3.09 – 3.06 (m, 1H), 2.93 (s, 3H), 2.80 – 2.75 (m, 1H), 2.40 – 2.36 (m, 2H), 1.38 (s, 3H), 1.34 (s, 3H). <sup>13</sup>C NMR (175 MHz, CDCl<sub>3</sub>) δ ( ppm ) 168.3, 149.67, 144.3, 137.2, 135.9, 135.4, 133.2, 130.0, 128.3, 127.5, 127.4, 126.6, 125.7, 124.1, 118.5, 116.7, 104.0, 87.3, 47.3, 28.3, 26.4, 23.8, 22.7, 21.9. HRMS (ESI-TOF): *m/z* calculated for C<sub>27</sub>H<sub>25</sub>Cl<sub>2</sub>N<sub>3</sub>O [M+Na]<sup>+</sup> : 500.1267, found: 500.1264.

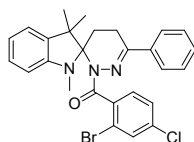

**3ai** (2-bromo-4-chlorophenyl)(1,3,3-trimethyl-6'-phenyl-4',5'-dihydro-2'H-spiro[indoli

**ne-2,3'-pyridazin]-2'-yl)methanone(3ai):** Yield (115.5mg, 82%); pink solid; m.p. 176.2-180.7 °C; <sup>1</sup>H NMR (600 MHz, CDCl<sub>3</sub>) δ ( ppm ) 7.57 (d, *J* = 1.8 Hz, 1H), 7.34 (dd, *J* = 8.4, 1.8 Hz, 2H), 7.32 – 7.30 (m, 1H), 7.29 – 7.27 (m, 2H), 7.25 – 7.24 (m, 1H), 7.16 (td, *J* = 7.8, 1.2 Hz, 1H), 7.11 (d, *J* = 8.4 Hz, 1H), 6.98 (dd, *J* = 7.2, 1.2 Hz, 1H), 6.76 (td, *J* = 7.8, 1.2 Hz, 1H), 6.46 (d, *J* = 7.8 Hz, 1H), 3.08 (dt, *J* = 18.0, 3.6 Hz, 1H), 2.96 (s, 3H), 2.81 – 2.75 (m, 1H), 2.39 (dd, *J* = 7.8, 2.4 Hz, 2H), 1.37 (s, 3H), 1.34 (s, 3H). <sup>13</sup>C NMR (150 MHz, CDCl<sub>3</sub>) δ ( ppm ) 169.9, 150.7, 145.3, 140.4, 136.9, 136.4, 134.0, 131.5, 129.3, 128.5, 127.6, 127.2, 125.1, 119.6, 119.5, 117.7, 105.1, 88.4, 48.5, 29.6, 27.4, 24.8, 23.7, 23.0. HRMS (ESI-TOF): *m/z* calculated for C<sub>27</sub>H<sub>25</sub>Br<sup>79</sup>ClN<sub>3</sub>O [M+Na]<sup>+</sup> : 544.0762, found: 544.0764; calculated for C<sub>27</sub>H<sub>25</sub>Br<sup>81</sup>ClN<sub>3</sub>O [M+ Na]<sup>+</sup> : 546.0741, found:546.0742.

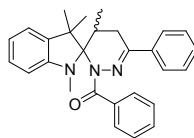

**3aj** phenyl(1,3,3,4'-tetramethyl-6'-phenyl-4',5'-dihydro-2'H-spiro[indoline-2,3'-pyrid

**azin]-2'-yl)methanone(3aj):** Yield (63.1mg, 50%); pink solid; m.p. 185.0-187.8 °C; The major diastereoisomer of the mixture: <sup>1</sup>H NMR (700 MHz, CDCl<sub>3</sub>) δ ( ppm ) 7.57 (d, *J* = 7.0 Hz, 2H), 7.47 (dd, *J* = 6.3, 2.1 Hz, 2H), 7.39 (t, *J* = 7.0 Hz, 1H), 7.30 – 7.27 (m, 5H), 7.15 (d, *J* = 7.7 Hz, 1H), 6.95 (d, *J* = 7.7 Hz, 1H), 6.75 (t, *J* = 7.0 Hz, 1H), 6.44 (d, *J* = 7.0 Hz, 1H), 3.09 (dd, *J* = 17.5, 4.9 Hz, 1H), 3.03 – 3.01 (m, 1H), 2.87 (ddd, *J* = 15.4, 7.7, 2.1 Hz, 1H), 2.82 (s, 3H), 1.47 (s, 3H), 1.37 (d, *J* = 7.0 Hz, 3H), 1.33 (s, 3H). <sup>13</sup>C NMR (175 MHz, CDCl<sub>3</sub>) δ ( ppm ) 171.71, 150.70, 143.56, 137.84, 137.50, 137.17, 136.76, 130.03, 129.68, 129.36, 128.91, 128.39, 127.56, 127.23, 125.16, 119.66, 118.19, 117.34, 104.65, 91.97, 50.07, 35.32, 32.45, 30.68, 27.94, 26.38, 20.10, 16.51. HRMS (ESI-TOF): *m/z* calculated for C<sub>28</sub>H<sub>29</sub>N<sub>3</sub>O [M+H]<sup>+</sup> : 424.2383, found: 424.2383.

## 5. X-ray crystal structure of **3z**

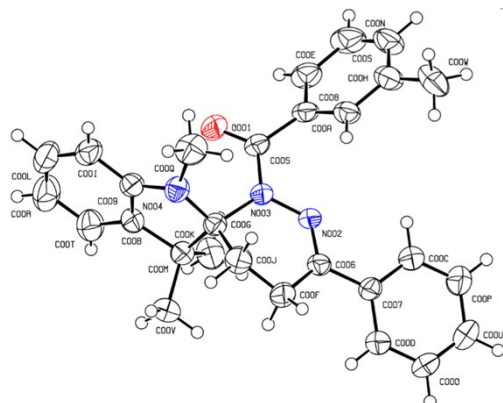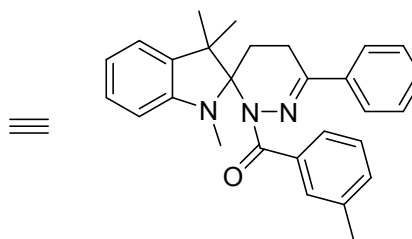

**3z**, CCDC 2015441

|                                             |                                                  |
|---------------------------------------------|--------------------------------------------------|
| Identification code                         | exp_6081                                         |
| Empirical formula                           | C <sub>28</sub> H <sub>29</sub> N <sub>3</sub> O |
| Formula weight                              | 423.54                                           |
| Temperature/K                               | 294.43(16)                                       |
| Crystal system                              | monoclinic                                       |
| Space group                                 | Cc                                               |
| a/Å                                         | 14.5799(6)                                       |
| b/Å                                         | 20.9306(11)                                      |
| c/Å                                         | 7.7649(4)                                        |
| $\alpha$ /°                                 | 90                                               |
| $\beta$ /°                                  | 101.063(4)                                       |
| $\gamma$ /°                                 | 90                                               |
| Volume/Å <sup>3</sup>                       | 2325.56(19)                                      |
| Z                                           | 4                                                |
| $\rho$ calcg/cm <sup>3</sup>                | 1.210                                            |
| $\mu$ /mm <sup>-1</sup>                     | 0.578                                            |
| F(000)                                      | 904.0                                            |
| Crystal size/mm <sup>3</sup>                | 0.65 × 0.3 × 0.2                                 |
| Radiation                                   | CuK $\alpha$ ( $\lambda$ = 1.54184)              |
| 2 $\theta$ range for data collection/°      | 8.448 to 143.59                                  |
| Index ranges                                | -17 ≤ h ≤ 17, -25 ≤ k ≤ 17, -9 ≤ l ≤ 8           |
| Reflections collected                       | 4980                                             |
| Independent reflections                     | 2574 [ $R_{int}$ = 0.0324, $R_{sigma}$ = 0.0331] |
| Data/restraints/parameters                  | 2574/2/293                                       |
| Goodness-of-fit on F <sup>2</sup>           | 1.046                                            |
| Final R indexes [ $I \geq 2\sigma(I)$ ]     | $R_1$ = 0.0618, $wR_2$ = 0.1540                  |
| Final R indexes [all data]                  | $R_1$ = 0.0626, $wR_2$ = 0.1568                  |
| Largest diff. peak/hole / e Å <sup>-3</sup> | 0.20/-0.35                                       |
| Flack parameter                             | 0.4(4)                                           |



## 6. DFT Calculations

The geometry optimizations for all of the species were performed with the density functional theory (DFT)<sup>[3]</sup> at the B3LYP-D3/6-31G(d) level<sup>[4]</sup> by using the Gaussian 16 program<sup>[5]</sup>. Then, the harmonic vibrational frequencies were analyzed to characterize the nature of the stationary point as a minimum with all positive frequencies or as a transition state with only one imaginary frequency and to provide thermodynamic quantity. Based on the optimized structures, the electronic energy ( $E_{\text{electron}}$ ) and solvation free energy ( $\Delta G_{\text{solv}}$ ) were calculated at the B3LYP-D3/6-311G(d,p) level of theory in aqueous and dichloromethane medium, respectively, while using SMD solvation model<sup>[6]</sup>.

To better understand the mechanism details of this [4 + 2] annulation reaction, we carried out computational studies by using the explicit inclusion of waters model (Figure 1) and the continuum solvation models (Figure 2). Interestingly, the DFT calculations elucidated that the reaction undergoes a stepwise ionic annulation rather than a synergetic pathway. Based on the experimental and computational results of this [4 + 2] annulation, the transition state of the first step, which is the rate-determining step, has been depicted in Figure 4. Water, the strong polar and H-bond donor solvent, will result in the reduction of the energy barrier of the first step, and accordingly lead to the increase of reaction rate. Meanwhile, the strong polar solvent results in a stable product with low energy. Figure 3 shows the DFT-optimized structures (bond lengths, Å) of transition state using DCM or water as the solvent.

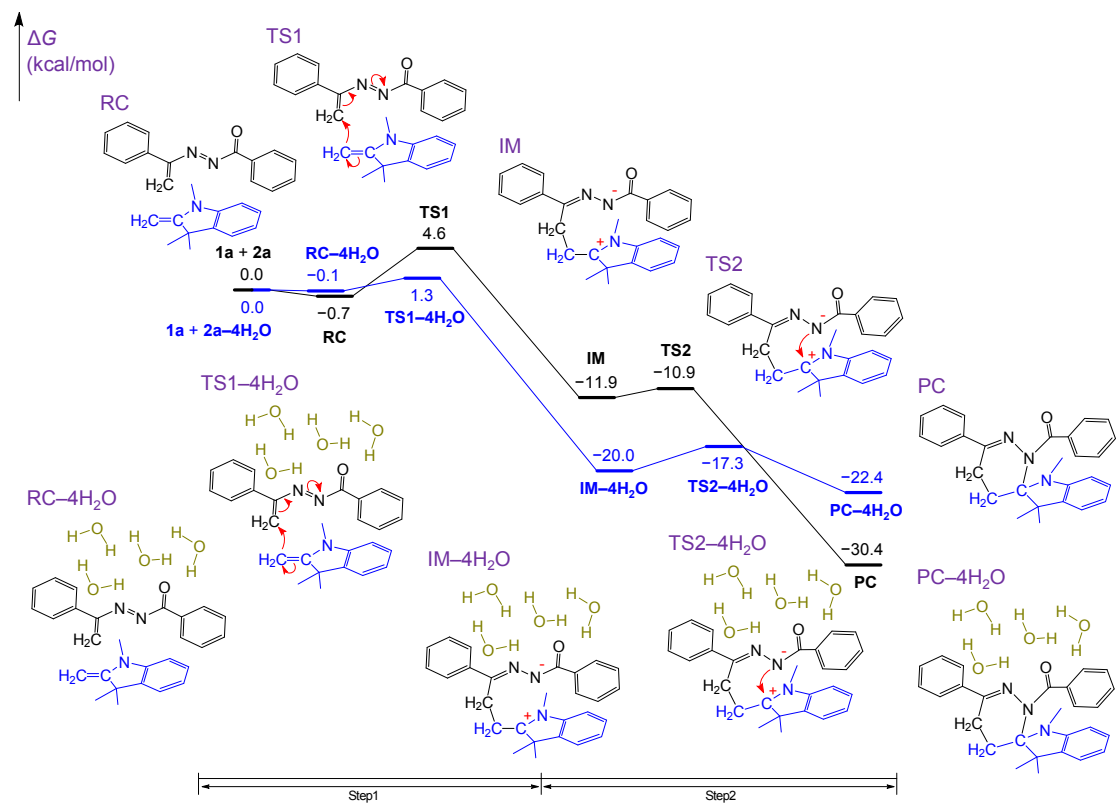

**Figure 1.** DFT-computed relative energy profiles at the B3LYP-D3/6-31G(d) level of theory.

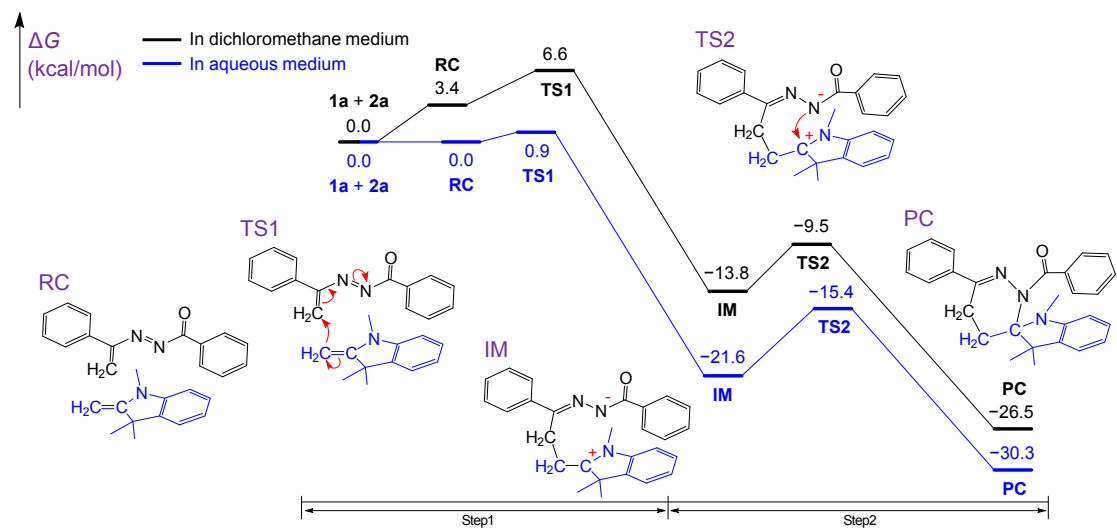

**Figure 2.** DFT-computed relative energy profiles at the B3LYP-D3/6-311G(d,p)/SMD// B3LYP-D3/6-31G(d) level of theory.

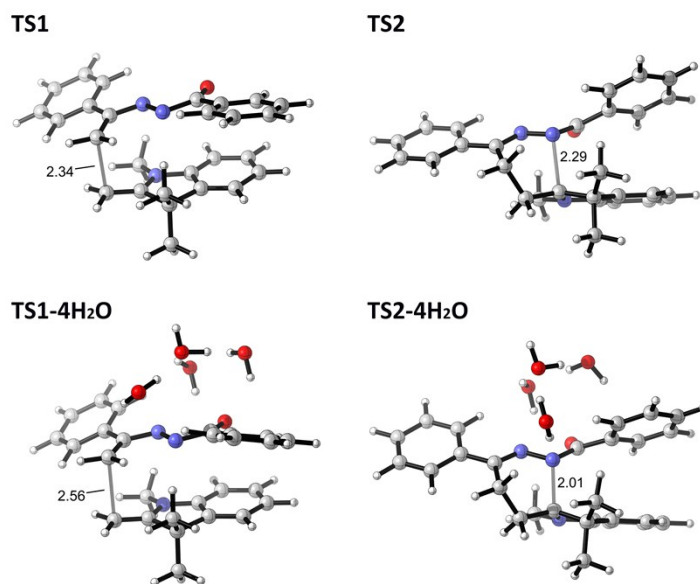

**Figure 3.** DFT-optimized structures (bond lengths, Å) of transition state.

## Reference

- [3]. a) P. Hohenberg, W. Kohn, *Phys. Rev.* 1964, **136**, B864–B871; b) W. Kohn, L. J. Sham, *Phys. Rev.* 1965, **140**, A1133–A1138.
- [4]. a) A. D. Becke, *J. Chem. Phys.*, 1993, **98**, 5648. b) C. Lee, W. Yang and R. G. Parr, *Phys. Rev. B: Condens. Matter Mater. Phys.*, 1988, **37**, 785.
- [5]. M. J. Frisch, G. W. Trucks, H. B. Schlegel, G. E. Scuseria, M. A. Robb, J. R. Cheeseman, G. Scalmani, V. Barone, G. A. Petersson, H. Nakatsuji, X. Li, M. Caricato, A. V. Marenich, J. Bloino, B. G. Janesko, R. Gomperts, B. Mennucci, H. P. Hratchian, J. V. Ortiz, A. F. Izmaylov, J. L. Sonnenberg, D. Williams-Young, F. Ding, F. Lipparini, F. Egidi, J. Goings, B. Peng, A. Petrone, T. Henderson, D. Ranasinghe, V. G. Zakrzewski, J. Gao, N. Rega, G. Zheng, W. Liang, M. Hada, M. Ehara, K. Toyota, R. Fukuda, J. Hasegawa, M. Ishida, T. Nakajima, Y. Honda, O. Kitao, H. Nakai, T. Vreven, K. Throssell, J. A. Jr. Montgomery, J. E. Peralta, F. Ogliaro, M. J. Bearpark, J. J. Heyd, E. N. Brothers, K. N. Kudin, V. N. Staroverov, T. A. Keith, R. Kobayashi, J. Normand, K. Raghavachari, A. P. Rendell, J. C. Burant, S. S. Iyengar, J. Tomasi, M. Cossi, J. M. Millam, M. Klene, C. Adamo, R. Cammi, J. W. Ochterski, R. L. Martin, K. Morokuma, O. Farkas, J. B. Foresman, D. J. Fox, *Gaussian 16*, revision B.01, Gaussian, Inc.: Wallingford, CT, 2016.
- [6]. A. V. Marenich, C. J. Cramer, D. G. Truhlar, *J. Phys. Chem. B* 2009, **113**, 6378–6396.

## Cartesian coordinate for theoretical calculation

### 1. Pathway-1

| RC |             |             |             |
|----|-------------|-------------|-------------|
| C  | 4.67216800  | -1.96414400 | -1.08147700 |
| C  | 3.44418800  | -2.00770100 | -0.42476500 |
| C  | 3.18336100  | -1.14317300 | 0.65017800  |
| C  | 4.17308400  | -0.23148900 | 1.04457400  |
| C  | 5.39943500  | -0.18930400 | 0.38472200  |
| C  | 5.65345500  | -1.05511900 | -0.68129400 |
| H  | 4.86215300  | -2.64058900 | -1.91007300 |
| H  | 2.67156700  | -2.69934700 | -0.74052800 |
| H  | 3.96102900  | 0.47349800  | 1.84123900  |
| H  | 6.15232400  | 0.53019000  | 0.69419400  |
| H  | 6.60776900  | -1.01751400 | -1.19896700 |
| C  | 1.87760600  | -1.18982200 | 1.34186000  |
| C  | 1.70145800  | -0.94861000 | 2.65395500  |
| H  | 2.53813500  | -0.70811300 | 3.29961200  |
| H  | 0.71709300  | -1.03337200 | 3.09874700  |
| N  | 0.82118300  | -1.64705700 | 0.50357200  |
| N  | -0.33834000 | -1.39393700 | 0.90028800  |
| C  | -1.35096900 | -2.00699100 | 0.02971900  |
| O  | -1.08204700 | -2.81518500 | -0.83535800 |
| C  | -2.72773200 | -1.57867500 | 0.36481900  |
| C  | -3.78016700 | -2.07669900 | -0.41869600 |
| C  | -3.00443500 | -0.68933600 | 1.41227900  |
| C  | -5.08924300 | -1.68983800 | -0.16132800 |
| H  | -3.54109100 | -2.76070000 | -1.22579700 |
| C  | -4.31885700 | -0.30304700 | 1.66752900  |
| H  | -2.19013600 | -0.30316400 | 2.01026300  |
| C  | -5.36034300 | -0.79985000 | 0.88350300  |
| H  | -5.90054000 | -2.07667400 | -0.77127000 |
| H  | -4.52980000 | 0.38865900  | 2.47806600  |
| H  | -6.38407300 | -0.49615700 | 1.08497700  |
| C  | -0.40377600 | 1.04400300  | -1.31915600 |
| C  | -1.09110300 | 1.89234600  | -0.43728500 |
| C  | -2.46966700 | 1.99609800  | -0.50217200 |
| C  | -3.16924700 | 1.25007000  | -1.46181100 |
| C  | -2.47622100 | 0.40636800  | -2.32956400 |
| C  | -1.08253900 | 0.28714400  | -2.27275000 |
| H  | -3.00678300 | 2.64870400  | 0.18122100  |
| H  | -4.25140000 | 1.30941200  | -1.51105200 |
| H  | -3.02456900 | -0.18155000 | -3.05963000 |
| H  | -0.55770600 | -0.38134300 | -2.94585500 |
| C  | -0.08750500 | 2.58642300  | 0.46712500  |
| C  | -0.23388600 | 2.10228100  | 1.92397900  |
| H  | 0.54846300  | 2.54083400  | 2.55329800  |
| H  | -1.21068500 | 2.39769500  | 2.32536700  |
| H  | -0.15070600 | 1.01428200  | 1.97304800  |
| C  | -0.21885700 | 4.11697400  | 0.39631800  |
| H  | -1.20319900 | 4.43100400  | 0.76167500  |
| H  | 0.54309400  | 4.60258700  | 1.01514000  |
| H  | -0.10384000 | 4.47235000  | -0.63176600 |
| C  | 1.94698700  | 0.60241700  | -2.01613500 |
| H  | 1.66513900  | -0.40923900 | -2.31458700 |
| H  | 2.02423900  | 1.23912400  | -2.90970200 |
| H  | 2.92113800  | 0.54063500  | -1.53421500 |
| N  | 0.97053400  | 1.11759700  | -1.08052500 |
| C  | 1.24945100  | 2.10857500  | -0.12823400 |
| C  | 2.46218600  | 2.57298700  | 0.20432000  |
| H  | 3.37620000  | 2.21519400  | -0.25168500 |
| H  | 2.55591300  | 3.33753000  | 0.96651200  |

**TS1**

|   |             |             |             |
|---|-------------|-------------|-------------|
| C | -4.83220100 | 2.00103300  | -1.10257700 |
| C | -3.57177600 | 1.83116700  | -0.53676900 |
| C | -3.38065100 | 0.95814100  | 0.55089600  |
| C | -4.50016100 | 0.26416900  | 1.04303100  |
| C | -5.76095800 | 0.43684500  | 0.47409300  |
| C | -5.93578400 | 1.30558500  | -0.60334300 |
| H | -4.95328600 | 2.68272900  | -1.94030500 |
| H | -2.71093100 | 2.35958400  | -0.92954700 |
| H | -4.39435400 | -0.42344500 | 1.87649900  |
| H | -6.60840300 | -0.11347900 | 0.87425600  |
| H | -6.91818000 | 1.43920200  | -1.04719400 |
| C | -2.02565000 | 0.75384800  | 1.10918600  |
| C | -1.77547800 | -0.02605600 | 2.22223900  |
| H | -2.57239300 | -0.32611300 | 2.89072100  |
| H | -0.77244300 | -0.04418600 | 2.62340800  |
| N | -1.01503200 | 1.29763600  | 0.34904500  |
| N | 0.18931300  | 1.15202500  | 0.76048700  |
| C | 1.12333300  | 1.71524700  | -0.16908400 |
| O | 0.84331600  | 2.13088300  | -1.28273400 |
| C | 2.52813500  | 1.70847900  | 0.33614400  |
| C | 3.55845700  | 1.94245800  | -0.58491700 |
| C | 2.84810400  | 1.48027800  | 1.68104800  |
| C | 4.88766000  | 1.92109900  | -0.17484000 |
| H | 3.28659700  | 2.12784000  | -1.61782000 |
| C | 4.17970700  | 1.46665800  | 2.09305700  |
| H | 2.04778800  | 1.32447100  | 2.39409900  |
| C | 5.20164800  | 1.67843200  | 1.16547700  |
| H | 5.68149000  | 2.09414500  | -0.89645100 |
| H | 4.42063600  | 1.29285500  | 3.13825100  |
| H | 6.23973300  | 1.66151000  | 1.48670500  |
| C | 0.35697900  | -1.32454800 | -1.41374700 |
| C | 1.39370600  | -1.73827600 | -0.56989500 |
| C | 2.71227500  | -1.57361500 | -0.96145900 |
| C | 2.97758000  | -0.98638400 | -2.20510400 |
| C | 1.92985300  | -0.58874500 | -3.04002200 |
| C | 0.59556700  | -0.75730400 | -2.65890900 |
| H | 3.52797400  | -1.87077900 | -0.30876600 |
| H | 4.00534900  | -0.82717600 | -2.51528300 |
| H | 2.15088000  | -0.12332300 | -3.99559400 |
| H | -0.21270700 | -0.41331900 | -3.29375500 |
| C | 0.79115900  | -2.37573300 | 0.66724800  |
| C | 1.36647400  | -1.82398600 | 1.97644800  |
| H | 0.87097400  | -2.27499200 | 2.84332900  |
| H | 2.43431900  | -2.05778200 | 2.04240800  |
| H | 1.24451000  | -0.74176100 | 2.00899500  |
| C | 0.98064000  | -3.91213300 | 0.60704200  |
| H | 2.04733200  | -4.15673700 | 0.64618500  |
| H | 0.48066900  | -4.39276400 | 1.45485800  |
| H | 0.56849900  | -4.32464900 | -0.31916700 |
| C | -2.13706800 | -1.32667200 | -1.47338900 |
| H | -2.18214300 | -0.29925400 | -1.84093900 |
| H | -2.22838100 | -2.02259300 | -2.31653400 |
| H | -2.97197200 | -1.47218600 | -0.79233400 |
| N | -0.87930900 | -1.55039700 | -0.78211200 |
| C | -0.69890400 | -2.06668100 | 0.47317300  |
| C | -1.67147600 | -2.21929200 | 1.42493400  |
| H | -2.72413100 | -2.18368300 | 1.17302200  |
| H | -1.41578800 | -2.72009800 | 2.35110900  |

**IM**

|   |            |            |            |
|---|------------|------------|------------|
| C | 5.44831400 | 1.28694200 | 1.46752900 |
|---|------------|------------|------------|

|            |             |             |             |
|------------|-------------|-------------|-------------|
| C          | 4.16376100  | 1.35131300  | 0.94472900  |
| C          | 3.81563900  | 0.63045000  | -0.21767600 |
| C          | 4.81111800  | -0.16017600 | -0.82054100 |
| C          | 6.10064100  | -0.22393100 | -0.29043700 |
| C          | 6.42908600  | 0.49852200  | 0.85451500  |
| H          | 5.69085000  | 1.85593800  | 2.36141800  |
| H          | 3.39602600  | 1.95312500  | 1.41766900  |
| H          | 4.58830200  | -0.73582000 | -1.71357300 |
| H          | 6.84924600  | -0.84244400 | -0.77892400 |
| H          | 7.43372600  | 0.45154800  | 1.26524000  |
| C          | 2.43445000  | 0.68147700  | -0.72640800 |
| C          | 2.01153600  | -0.09647700 | -1.93489400 |
| H          | 2.83186700  | -0.27090000 | -2.63388600 |
| H          | 1.21864800  | 0.44769200  | -2.45108800 |
| N          | 1.54024200  | 1.27340500  | 0.01287300  |
| N          | 0.27483600  | 1.29979000  | -0.45777600 |
| C          | -0.63725100 | 1.46862400  | 0.55038400  |
| O          | -0.45075500 | 1.21695000  | 1.75529100  |
| C          | -1.99932900 | 1.89625500  | 0.08496500  |
| C          | -3.09033800 | 1.70836500  | 0.94150500  |
| C          | -2.20885100 | 2.49064300  | -1.16686500 |
| C          | -4.37331000 | 2.07450700  | 0.54270600  |
| H          | -2.90472100 | 1.26367900  | 1.91228900  |
| C          | -3.49178700 | 2.86417400  | -1.56452200 |
| H          | -1.35318600 | 2.65473200  | -1.81327100 |
| C          | -4.57879700 | 2.65049300  | -0.71347100 |
| H          | -5.21545600 | 1.91247300  | 1.21082200  |
| H          | -3.64426700 | 3.32768900  | -2.53583200 |
| H          | -5.57945000 | 2.93961500  | -1.02438800 |
| C          | -1.21597900 | -1.59421000 | 1.05150400  |
| C          | -2.03627000 | -1.67016900 | -0.07304300 |
| C          | -3.41318200 | -1.74309600 | 0.08057800  |
| C          | -3.94015100 | -1.73684400 | 1.37551800  |
| C          | -3.09800200 | -1.66480600 | 2.49172400  |
| C          | -1.71124100 | -1.58780500 | 2.34764300  |
| H          | -4.06940000 | -1.78632500 | -0.78339500 |
| H          | -5.01567900 | -1.77502800 | 1.51731400  |
| H          | -3.52795300 | -1.64758000 | 3.48834100  |
| H          | -1.06222000 | -1.47621300 | 3.20739300  |
| C          | -1.15967800 | -1.73559200 | -1.30376000 |
| C          | -1.52753600 | -0.76248400 | -2.43144100 |
| H          | -0.85831400 | -0.89936400 | -3.28769200 |
| H          | -2.54966700 | -0.96358900 | -2.76807000 |
| H          | -1.45581800 | 0.26686100  | -2.08740700 |
| C          | -1.18367100 | -3.19627600 | -1.84271000 |
| H          | -2.20069000 | -3.43435800 | -2.16750500 |
| H          | -0.51596500 | -3.31239900 | -2.70205200 |
| H          | -0.89570900 | -3.91390200 | -1.06822700 |
| C          | 1.23191400  | -1.32440400 | 1.57998300  |
| H          | 1.14161500  | -0.30510000 | 1.96896700  |
| H          | 1.12616900  | -2.06817300 | 2.37397400  |
| H          | 2.19190800  | -1.44086800 | 1.08178100  |
| N          | 0.14347800  | -1.52039000 | 0.62020100  |
| C          | 0.21496400  | -1.47550300 | -0.70075600 |
| C          | 1.46472200  | -1.49774400 | -1.50745800 |
| H          | 2.25714900  | -2.02234900 | -0.96342600 |
| H          | 1.25451600  | -2.07764700 | -2.41169400 |
| <b>TS2</b> |             |             |             |
| C          | -5.49865000 | 1.13917200  | -1.59672000 |
| C          | -4.20209700 | 1.09212800  | -1.10222100 |
| C          | -3.92282400 | 0.49509200  | 0.14504100  |
| C          | -4.99664000 | -0.05501600 | 0.86540300  |

|           |             |             |             |
|-----------|-------------|-------------|-------------|
| C         | -6.29806200 | -0.00810700 | 0.36426500  |
| C         | -6.55832200 | 0.58826100  | -0.86766000 |
| H         | -5.68754600 | 1.60685200  | -2.55951600 |
| H         | -3.37450200 | 1.51186600  | -1.66282600 |
| H         | -4.82874200 | -0.52392300 | 1.82944300  |
| H         | -7.10975000 | -0.44010900 | 0.94375700  |
| H         | -7.57183000 | 0.62522600  | -1.25710500 |
| C         | -2.53306000 | 0.44719600  | 0.63342200  |
| C         | -2.12147600 | -0.26047900 | 1.88459000  |
| H         | -2.96112100 | -0.55542900 | 2.51485200  |
| H         | -1.46449600 | 0.39594000  | 2.46431300  |
| N         | -1.60578200 | 0.95093000  | -0.12558200 |
| N         | -0.33881200 | 0.91049300  | 0.36222700  |
| C         | 0.57171100  | 1.22940600  | -0.65217400 |
| O         | 0.39592700  | 1.01149100  | -1.85227300 |
| C         | 1.84371200  | 1.86503900  | -0.18596400 |
| C         | 2.98630300  | 1.75277000  | -0.98738200 |
| C         | 1.90105100  | 2.62232900  | 0.99100300  |
| C         | 4.18006200  | 2.35119400  | -0.59619700 |
| H         | 2.91827200  | 1.17789100  | -1.90379200 |
| C         | 3.09349600  | 3.23452700  | 1.37590700  |
| H         | 1.00118100  | 2.72625500  | 1.58810200  |
| C         | 4.23704000  | 3.09244000  | 0.58759200  |
| H         | 5.06798500  | 2.24288000  | -1.21333300 |
| H         | 3.12970500  | 3.82566400  | 2.28697500  |
| H         | 5.16809200  | 3.56469000  | 0.88978100  |
| C         | 1.43741000  | -1.69787100 | -0.93905200 |
| C         | 2.22300100  | -1.50263200 | 0.20098500  |
| C         | 3.60397100  | -1.45468300 | 0.09406300  |
| C         | 4.18466700  | -1.59261800 | -1.17174400 |
| C         | 3.38462100  | -1.78754800 | -2.30256600 |
| C         | 1.99107300  | -1.84244300 | -2.20477800 |
| H         | 4.22338000  | -1.29233700 | 0.97123600  |
| H         | 5.26358100  | -1.53727000 | -1.27853100 |
| H         | 3.84940400  | -1.88328000 | -3.27928900 |
| H         | 1.37359400  | -1.94951700 | -3.08890800 |
| C         | 1.30771200  | -1.49537700 | 1.40756800  |
| C         | 1.61510000  | -0.48274500 | 2.50925400  |
| H         | 0.87706300  | -0.56232500 | 3.31498700  |
| H         | 2.60014000  | -0.69379300 | 2.93941100  |
| H         | 1.60524900  | 0.53404900  | 2.12887200  |
| C         | 1.37136500  | -2.93149500 | 2.01666200  |
| H         | 2.39895400  | -3.13062800 | 2.33412000  |
| H         | 0.72311600  | -3.02445300 | 2.89370400  |
| H         | 1.08754100  | -3.69103200 | 1.28203600  |
| C         | -0.99807300 | -1.71563300 | -1.55774100 |
| H         | -1.04944000 | -0.73048300 | -2.03116300 |
| H         | -0.78091900 | -2.49435800 | -2.29312700 |
| H         | -1.95096200 | -1.93150900 | -1.07554200 |
| N         | 0.06908600  | -1.70410700 | -0.56241500 |
| C         | -0.06162400 | -1.32768800 | 0.73194100  |
| C         | -1.32566100 | -1.53844900 | 1.51447900  |
| H         | -1.99073400 | -2.21578300 | 0.97021800  |
| H         | -1.05091300 | -2.04884700 | 2.44204500  |
| <b>PC</b> |             |             |             |
| C         | 5.36064800  | -0.15749600 | 0.13615600  |
| C         | 3.98146300  | -0.14668600 | 0.30479600  |
| C         | 3.23610200  | -1.33476500 | 0.18525200  |
| C         | 3.91737300  | -2.52562700 | -0.10949200 |
| C         | 5.30190300  | -2.53207100 | -0.28076100 |
| C         | 6.02971500  | -1.35018000 | -0.15683500 |
| H         | 5.91959300  | 0.76889900  | 0.23598000  |

|   |             |             |             |
|---|-------------|-------------|-------------|
| H | 3.45898200  | 0.77580700  | 0.52990500  |
| H | 3.36931200  | -3.45564400 | -0.22050700 |
| H | 5.80936200  | -3.46440500 | -0.51214100 |
| H | 7.10824600  | -1.35549300 | -0.28622600 |
| C | 1.76391700  | -1.31682500 | 0.33494400  |
| C | 0.97464200  | -2.59544300 | 0.38231600  |
| H | 1.52776800  | -3.36029900 | 0.93691800  |
| H | 0.83543100  | -2.99111100 | -0.63222800 |
| N | 1.21321900  | -0.15658400 | 0.42158500  |
| N | -0.13810000 | 0.02893000  | 0.49937100  |
| C | -0.53106800 | 1.37174200  | 0.41045400  |
| O | -1.68593500 | 1.72127400  | 0.60711300  |
| C | 0.50165500  | 2.41149000  | 0.06706800  |
| C | 0.37036100  | 3.64289000  | 0.72094000  |
| C | 1.46541800  | 2.27377100  | -0.94167100 |
| C | 1.21759400  | 4.70413500  | 0.41027500  |
| H | -0.40671000 | 3.75459300  | 1.46950100  |
| C | 2.29296000  | 3.34507100  | -1.27118200 |
| H | 1.56999700  | 1.33304200  | -1.46706600 |
| C | 2.18152000  | 4.55780200  | -0.58802000 |
| H | 1.11814100  | 5.64739100  | 0.93978600  |
| H | 3.03044300  | 3.22909800  | -2.06035200 |
| H | 2.83847200  | 5.38630500  | -0.83804200 |
| C | -3.37468300 | -0.48068600 | 0.54553000  |
| C | -3.10432800 | -0.68762300 | -0.81078400 |
| C | -4.04641600 | -0.36900800 | -1.77278500 |
| C | -5.27835000 | 0.17052700  | -1.37183000 |
| C | -5.53960000 | 0.37090700  | -0.01672700 |
| C | -4.59171100 | 0.05014900  | 0.96315800  |
| H | -3.83553000 | -0.52734100 | -2.82775500 |
| H | -6.02369900 | 0.43387000  | -2.11613000 |
| H | -6.49263600 | 0.79328200  | 0.29031400  |
| H | -4.79828800 | 0.23146600  | 2.01258900  |
| C | -1.74652800 | -1.35201200 | -0.95340700 |
| C | -0.89609800 | -0.75289300 | -2.08145900 |
| H | 0.11573400  | -1.17154700 | -2.09572100 |
| H | -1.36098500 | -0.97989500 | -3.04652600 |
| H | -0.82149300 | 0.33334300  | -2.00129500 |
| C | -2.00748400 | -2.84668200 | -1.24751400 |
| H | -2.55814000 | -2.92549100 | -2.18990400 |
| H | -1.08439900 | -3.42633100 | -1.35246100 |
| H | -2.62584400 | -3.30205800 | -0.46887400 |
| C | -2.17801200 | -0.38326800 | 2.69012800  |
| H | -2.25560400 | 0.71084700  | 2.71760700  |
| H | -2.96546300 | -0.81749800 | 3.31645700  |
| H | -1.21561200 | -0.67567700 | 3.11335800  |
| N | -2.29459400 | -0.88033100 | 1.33320200  |
| C | -1.12307700 | -1.12802500 | 0.50172300  |
| C | -0.35623800 | -2.32822000 | 1.07382000  |
| H | -0.15429500 | -2.12529400 | 2.13056500  |
| H | -1.00905100 | -3.19999200 | 1.04171400  |

**1a**

|   |            |             |             |
|---|------------|-------------|-------------|
| C | 0.66494000 | 0.75554000  | 0.00035800  |
| C | 0.54755100 | -0.64452400 | 0.00002600  |
| C | 1.67985900 | -1.43960000 | -0.00051400 |
| C | 2.94633600 | -0.83440100 | -0.00112900 |
| C | 3.05081600 | 0.55630900  | -0.00134100 |
| C | 1.91355000 | 1.37409700  | -0.00080300 |
| H | 1.59044200 | -2.52323600 | -0.00065100 |
| H | 3.84191400 | -1.44800800 | -0.00170900 |
| H | 4.03242900 | 1.02224300  | -0.00224900 |
| H | 2.01672100 | 2.45445500  | -0.00180300 |



|   |             |             |             |
|---|-------------|-------------|-------------|
| C | -0.92412200 | -1.02655300 | 0.00074600  |
| C | -1.29806200 | -1.81996400 | 1.26671500  |
| H | -2.37354000 | -2.02658200 | 1.28805800  |
| H | -0.76220100 | -2.77566400 | 1.29080400  |
| H | -1.03867300 | -1.25824300 | 2.16903900  |
| C | -1.29861000 | -1.82475400 | -1.26188600 |
| H | -0.76279600 | -2.78055800 | -1.28251400 |
| H | -2.37405500 | -2.03162100 | -1.28202400 |
| H | -1.03967500 | -1.26653000 | -2.16649400 |
| C | -0.90825000 | 2.73770000  | 0.00169300  |
| H | 0.01734700  | 3.31368600  | 0.01998300  |
| H | -1.47732600 | 3.01529000  | -0.89564000 |
| H | -1.50617000 | 3.00688600  | 0.88243900  |
| N | -0.60792700 | 1.32872400  | 0.00216000  |
| C | -1.60536500 | 0.35143000  | -0.00125600 |
| C | -2.92556200 | 0.58874700  | -0.00553400 |
| H | -3.34068100 | 1.58987800  | -0.00796500 |
| H | -3.62673600 | -0.23723000 | -0.00685600 |

**2a**

|   |             |             |             |
|---|-------------|-------------|-------------|
| C | -4.41631000 | -1.53593000 | -0.44350300 |
| C | -3.13063300 | -0.99815100 | -0.45390200 |
| C | -2.91968400 | 0.34396200  | -0.09831700 |
| C | -4.02177500 | 1.12151300  | 0.29148100  |
| C | -5.30389900 | 0.58094400  | 0.29807100  |
| C | -5.50751800 | -0.75028500 | -0.07300000 |
| H | -4.56347300 | -2.57460100 | -0.72549100 |
| H | -2.28175100 | -1.60863800 | -0.73785000 |
| H | -3.87127300 | 2.14759100  | 0.61270200  |
| H | -6.14493700 | 1.19652500  | 0.60443400  |
| H | -6.50827900 | -1.17257200 | -0.06312200 |
| C | -1.55727000 | 0.92054000  | -0.11620300 |
| C | -1.25598200 | 2.22551100  | -0.22919400 |
| H | -2.02525200 | 2.97985200  | -0.34577200 |
| H | -0.22160500 | 2.54692700  | -0.25483900 |
| N | -0.52501000 | -0.06507700 | -0.14362900 |
| N | 0.52677300  | 0.23982400  | 0.45372500  |
| C | 1.52580700  | -0.81834200 | 0.38756800  |
| O | 1.23151500  | -1.98179700 | 0.56861600  |
| C | 2.90534000  | -0.32393500 | 0.16753400  |
| C | 3.92253400  | -1.27163600 | -0.02224400 |
| C | 3.21006200  | 1.04471500  | 0.12368100  |
| C | 5.22732800  | -0.85508500 | -0.25916100 |
| H | 3.66335700  | -2.32424200 | 0.01845200  |
| C | 4.51966000  | 1.45717600  | -0.11349200 |
| H | 2.42430300  | 1.77194500  | 0.29149100  |
| C | 5.52704000  | 0.51015100  | -0.30586100 |
| H | 6.01313500  | -1.58989800 | -0.40754100 |
| H | 4.75561900  | 2.51683600  | -0.14318600 |
| H | 6.54749600  | 0.83452700  | -0.48962300 |

2. Pathway-2

**RC-4H<sub>2</sub>O**

|   |             |             |             |
|---|-------------|-------------|-------------|
| C | -4.77259200 | -1.75196600 | 1.05672800  |
| C | -3.49005400 | -1.54956800 | 0.54852400  |
| C | -3.28310400 | -0.68293700 | -0.53774000 |
| C | -4.39855300 | -0.03007300 | -1.09146300 |
| C | -5.67754500 | -0.23562500 | -0.58063400 |
| C | -5.87166900 | -1.09765100 | 0.50005000  |
| H | -4.90832100 | -2.43120100 | 1.89370900  |
| H | -2.65292400 | -2.07568600 | 0.99235900  |
| H | -4.26816200 | 0.66116000  | -1.91800400 |
| H | -6.52220500 | 0.28505700  | -1.02340600 |

|                            |             |             |             |
|----------------------------|-------------|-------------|-------------|
| H                          | -6.86833900 | -1.25637500 | 0.90189500  |
| C                          | -1.92078800 | -0.43148100 | -1.06486000 |
| C                          | -1.68215700 | 0.12636100  | -2.28554700 |
| H                          | -2.48180500 | 0.30962000  | -2.99121200 |
| H                          | -0.66782900 | 0.28085800  | -2.62400300 |
| N                          | -0.88061000 | -0.76002900 | -0.18158300 |
| N                          | 0.29254700  | -0.51305200 | -0.60348100 |
| C                          | 1.31184700  | -0.88940100 | 0.32391800  |
| O                          | 1.10640800  | -1.23243600 | 1.48790800  |
| C                          | 2.67524000  | -0.83357100 | -0.24757900 |
| C                          | 3.76616100  | -0.77506700 | 0.63400300  |
| C                          | 2.89472700  | -0.87186700 | -1.63357900 |
| C                          | 5.06314400  | -0.72339900 | 0.13685400  |
| H                          | 3.57313700  | -0.74650600 | 1.70049200  |
| C                          | 4.19920400  | -0.83669900 | -2.12325000 |
| H                          | 2.05221500  | -0.98631500 | -2.30796000 |
| C                          | 5.28071900  | -0.75101800 | -1.24448200 |
| H                          | 5.90523900  | -0.66409500 | 0.82040200  |
| H                          | 4.37060200  | -0.88284500 | -3.19471300 |
| H                          | 6.29482500  | -0.71519200 | -1.63326300 |
| C                          | -0.05583700 | 2.02730200  | 1.38933100  |
| C                          | 1.04619100  | 2.43413600  | 0.62448500  |
| C                          | 2.32383700  | 2.35780800  | 1.15635200  |
| C                          | 2.48746100  | 1.87000000  | 2.45920100  |
| C                          | 1.37637800  | 1.48053300  | 3.21320200  |
| C                          | 0.08229300  | 1.55921700  | 2.69179300  |
| H                          | 3.18707500  | 2.65844800  | 0.56962200  |
| H                          | 3.48324300  | 1.79326500  | 2.88456700  |
| H                          | 1.51769700  | 1.09941300  | 4.22002700  |
| H                          | -0.77280000 | 1.23570100  | 3.27457500  |
| C                          | 0.54818600  | 2.99892600  | -0.69348800 |
| C                          | 1.26070300  | 2.41799500  | -1.92089000 |
| H                          | 0.83483800  | 2.82340900  | -2.84518700 |
| H                          | 2.32312800  | 2.68368400  | -1.89826500 |
| H                          | 1.17815000  | 1.33141800  | -1.93298300 |
| C                          | 0.69542200  | 4.54046800  | -0.67791200 |
| H                          | 1.75431000  | 4.81510400  | -0.62416800 |
| H                          | 0.26721300  | 4.97290800  | -1.58844800 |
| H                          | 0.18411400  | 4.97626700  | 0.18613700  |
| C                          | -2.54138700 | 1.99713600  | 1.22808900  |
| H                          | -2.60730300 | 1.03283700  | 1.73698300  |
| H                          | -2.73761500 | 2.80307800  | 1.94723700  |
| H                          | -3.30553400 | 2.01112200  | 0.45484100  |
| N                          | -1.22721700 | 2.15625300  | 0.63464600  |
| C                          | -0.94859100 | 2.65391400  | -0.62863100 |
| C                          | -1.83264500 | 2.80153400  | -1.64030600 |
| H                          | -2.89499400 | 2.63283700  | -1.52023600 |
| H                          | -1.50244100 | 3.21591000  | -2.58466400 |
| O                          | 0.37984900  | -2.42450500 | -3.04789400 |
| H                          | 0.56873200  | -2.89466800 | -2.20910800 |
| H                          | -0.46984600 | -1.99658900 | -2.86282600 |
| O                          | -0.88024500 | -3.25545300 | 1.76085700  |
| H                          | -0.56110400 | -2.32973300 | 1.73185600  |
| H                          | -0.76361000 | -3.52710400 | 0.82660100  |
| O                          | 1.80558900  | -3.95322300 | 1.71283600  |
| H                          | 0.88017500  | -3.91426000 | 2.05080000  |
| H                          | 2.07137600  | -3.01941800 | 1.80124500  |
| O                          | 0.51144700  | -3.93250800 | -0.64478100 |
| H                          | 1.18024600  | -3.96986000 | 0.09631900  |
| H                          | 0.46153500  | -4.83950500 | -0.98272600 |
| <b>TS1-4H<sub>2</sub>O</b> |             |             |             |
| C                          | -4.80616800 | -1.69413600 | 1.07565400  |

|   |             |             |             |
|---|-------------|-------------|-------------|
| C | -3.52185000 | -1.49878800 | 0.57026200  |
| C | -3.30708400 | -0.63592500 | -0.51825300 |
| C | -4.41963600 | 0.01762600  | -1.07756300 |
| C | -5.70106700 | -0.18088800 | -0.56898900 |
| C | -5.90184000 | -1.03730100 | 0.51444600  |
| H | -4.94657600 | -2.37065100 | 1.91413200  |
| H | -2.68787200 | -2.02777600 | 1.01678900  |
| H | -4.28840400 | 0.70077600  | -1.91070800 |
| H | -6.54252400 | 0.34001700  | -1.01768700 |
| H | -6.90023900 | -1.19127800 | 0.91382000  |
| C | -1.94079200 | -0.39020700 | -1.03746100 |
| C | -1.69766500 | 0.21261400  | -2.24596100 |
| H | -2.49287900 | 0.39137900  | -2.95765500 |
| H | -0.68160100 | 0.32196700  | -2.59582000 |
| N | -0.90880300 | -0.74022200 | -0.17148400 |
| N | 0.27403100  | -0.50615100 | -0.59528100 |
| C | 1.28217800  | -0.89607800 | 0.32524400  |
| O | 1.08002200  | -1.22578200 | 1.49628900  |
| C | 2.64692200  | -0.87325900 | -0.25083400 |
| C | 3.74138200  | -0.81468700 | 0.62565700  |
| C | 2.86183400  | -0.94401100 | -1.63607700 |
| C | 5.03787200  | -0.79434100 | 0.12394700  |
| H | 3.55217500  | -0.76301000 | 1.69200100  |
| C | 4.16513500  | -0.93989700 | -2.13036700 |
| H | 2.01482400  | -1.05762100 | -2.30535700 |
| C | 5.25097700  | -0.85375700 | -1.25686300 |
| H | 5.88289300  | -0.73541100 | 0.80402700  |
| H | 4.33230100  | -1.01114400 | -3.20120700 |
| H | 6.26432200  | -0.84278500 | -1.64920000 |
| C | 0.01397700  | 2.05481300  | 1.38520100  |
| C | 1.10903600  | 2.43546100  | 0.59866100  |
| C | 2.39178300  | 2.36221500  | 1.11823600  |
| C | 2.56447500  | 1.90176400  | 2.42975900  |
| C | 1.45936300  | 1.53693100  | 3.20457100  |
| C | 0.16031900  | 1.61405500  | 2.69548400  |
| H | 3.25132100  | 2.64086700  | 0.51567100  |
| H | 3.56427800  | 1.82475500  | 2.84552200  |
| H | 1.60937900  | 1.17546400  | 4.21726900  |
| H | -0.69100200 | 1.30741900  | 3.29265600  |
| C | 0.59836300  | 2.96732400  | -0.72752000 |
| C | 1.30515800  | 2.36883200  | -1.94930900 |
| H | 0.87224700  | 2.75680100  | -2.87787000 |
| H | 2.36573700  | 2.64184200  | -1.93766800 |
| H | 1.22830300  | 1.28197600  | -1.94134900 |
| C | 0.73227500  | 4.51125600  | -0.74397400 |
| H | 1.78948800  | 4.79402700  | -0.70509800 |
| H | 0.29361000  | 4.92177000  | -1.65966000 |
| H | 0.22551300  | 4.96073000  | 0.11576000  |
| C | -2.47429100 | 2.01207700  | 1.24503100  |
| H | -2.53945400 | 1.04013800  | 1.73906200  |
| H | -2.65113300 | 2.80800900  | 1.97941500  |
| H | -3.24906100 | 2.04594800  | 0.48323500  |
| N | -1.16576900 | 2.17457000  | 0.63710700  |
| C | -0.89474700 | 2.61853300  | -0.63983300 |
| C | -1.78679500 | 2.70367200  | -1.66055500 |
| H | -2.85184800 | 2.58065100  | -1.51368500 |
| H | -1.46558500 | 3.10057600  | -2.61545500 |
| O | 0.28672700  | -2.43863100 | -3.02732000 |
| H | 0.49187600  | -2.91374400 | -2.19501200 |
| H | -0.53655500 | -1.97776400 | -2.80622600 |
| O | -0.92551300 | -3.22768800 | 1.77910500  |
| H | -0.59116300 | -2.30729200 | 1.74216100  |
| H | -0.81515700 | -3.50775000 | 0.84661900  |

|   |            |             |             |
|---|------------|-------------|-------------|
| O | 1.75534400 | -3.94664600 | 1.73016700  |
| H | 0.83071600 | -3.90491900 | 2.06944800  |
| H | 2.01729500 | -3.01015200 | 1.80635500  |
| O | 0.45491400 | -3.94415800 | -0.62509700 |
| H | 1.12523700 | -3.97537800 | 0.11487700  |
| H | 0.39668800 | -4.85596300 | -0.94827800 |

**IM-4H<sub>2</sub>O**

|   |             |             |             |
|---|-------------|-------------|-------------|
| C | -5.39479500 | 0.63081800  | -1.44319300 |
| C | -4.11746200 | 0.70592700  | -0.90155000 |
| C | -3.71299000 | -0.18367700 | 0.11579000  |
| C | -4.64007900 | -1.14498400 | 0.55696200  |
| C | -5.92016000 | -1.21918700 | 0.00627800  |
| C | -6.30568600 | -0.33201600 | -0.99600600 |
| H | -5.68469100 | 1.33333600  | -2.21991700 |
| H | -3.41993900 | 1.45774100  | -1.25284000 |
| H | -4.37184900 | -1.85017200 | 1.33734500  |
| H | -6.61515900 | -1.97291000 | 0.36682300  |
| H | -7.30378200 | -0.38454500 | -1.42178000 |
| C | -2.33510500 | -0.12800400 | 0.65066100  |
| C | -1.93200600 | -0.98829900 | 1.81849100  |
| H | -2.78871200 | -1.23601500 | 2.44790400  |
| H | -1.21695700 | -0.45683400 | 2.44524700  |
| N | -1.47038500 | 0.56255100  | -0.02254600 |
| N | -0.18569200 | 0.62279500  | 0.43980100  |
| C | 0.66511000  | 0.99762200  | -0.55141700 |
| O | 0.39478800  | 0.99943800  | -1.77744200 |
| C | 2.05035800  | 1.39053400  | -0.12255500 |
| C | 3.05108600  | 1.40882000  | -1.10547700 |
| C | 2.37311400  | 1.78688100  | 1.18637000  |
| C | 4.35859700  | 1.76180200  | -0.78297200 |
| H | 2.77365900  | 1.13796800  | -2.11688100 |
| C | 3.68372500  | 2.14310900  | 1.50369500  |
| H | 1.60198700  | 1.84900500  | 1.94792800  |
| C | 4.68155400  | 2.12106500  | 0.52711200  |
| H | 5.12507100  | 1.76146800  | -1.55357300 |
| H | 3.92078300  | 2.45340800  | 2.51764400  |
| H | 5.70043500  | 2.40128900  | 0.78128500  |
| C | 1.42158300  | -2.00657800 | -1.13685600 |
| C | 2.21430000  | -2.11883300 | 0.00427800  |
| C | 3.59483000  | -2.04410600 | -0.10813600 |
| C | 4.14767700  | -1.85392200 | -1.37833200 |
| C | 3.33238400  | -1.74699800 | -2.51093200 |
| C | 1.94117000  | -1.81638200 | -2.40850600 |
| H | 4.23184900  | -2.11055300 | 0.76827600  |
| H | 5.22442300  | -1.77082200 | -1.48560700 |
| H | 3.78405800  | -1.58387500 | -3.48421900 |
| H | 1.30570200  | -1.68232300 | -3.27523300 |
| C | 1.31336700  | -2.37908600 | 1.19005400  |
| C | 1.55042100  | -1.47122200 | 2.40623600  |
| H | 0.86145700  | -1.72378900 | 3.21807100  |
| H | 2.57119000  | -1.62029400 | 2.77179000  |
| H | 1.41246500  | -0.42565400 | 2.14299900  |
| C | 1.45756400  | -3.87149700 | 1.61098400  |
| H | 2.47922500  | -4.03753100 | 1.96383400  |
| H | 0.77100000  | -4.11792600 | 2.42656500  |
| H | 1.27155300  | -4.54725600 | 0.77044600  |
| C | -1.01877800 | -1.90365900 | -1.73118300 |
| H | -0.96893700 | -0.86220000 | -2.06288800 |
| H | -0.85041100 | -2.59432700 | -2.56131900 |
| H | -1.98834100 | -2.08954200 | -1.27563800 |
| N | 0.04927100  | -2.10152900 | -0.74684800 |
| C | -0.05985100 | -2.20613100 | 0.56146100  |

|   |             |             |             |
|---|-------------|-------------|-------------|
| C | -1.32894800 | -2.34097500 | 1.32274100  |
| H | -2.07965800 | -2.85744900 | 0.71571900  |
| H | -1.12332500 | -2.97036300 | 2.19415800  |
| O | -0.36750200 | 1.70380300  | 3.04382900  |
| H | -0.81950400 | 2.52041700  | 2.74989100  |
| H | -0.24196400 | 1.26732700  | 2.17194600  |
| O | -1.58577200 | 3.08450400  | -1.60656400 |
| H | -1.17606700 | 2.20393700  | -1.74750200 |
| H | -1.83028000 | 3.05043800  | -0.65958400 |
| O | 0.58642200  | 4.32909000  | -0.50321800 |
| H | -0.07575900 | 3.97639800  | -1.15042800 |
| H | 1.31548100  | 3.68900100  | -0.52869600 |
| O | -1.35985200 | 3.70310200  | 1.27345100  |
| H | -0.51995300 | 3.94569300  | 0.79877800  |
| H | -1.79793400 | 4.55461500  | 1.42218000  |

**TS2-4H<sub>2</sub>O**

|   |             |             |             |
|---|-------------|-------------|-------------|
| C | -5.52262800 | 0.62287200  | -1.37228500 |
| C | -4.21396200 | 0.55254800  | -0.90979600 |
| C | -3.84964000 | -0.38180600 | 0.07990700  |
| C | -4.84587200 | -1.23960200 | 0.57617500  |
| C | -6.15691100 | -1.16903400 | 0.10583800  |
| C | -6.50346800 | -0.23688400 | -0.86971900 |
| H | -5.77861000 | 1.35742200  | -2.13081200 |
| H | -3.46928100 | 1.23094700  | -1.30734800 |
| H | -4.60932100 | -1.98108100 | 1.33107600  |
| H | -6.90610300 | -1.84631900 | 0.50651700  |
| H | -7.52526000 | -0.17798500 | -1.23403100 |
| C | -2.45060800 | -0.46684100 | 0.55411700  |
| C | -2.03801000 | -1.33263700 | 1.70504800  |
| H | -2.87591000 | -1.84099900 | 2.18076700  |
| H | -1.57103100 | -0.70091200 | 2.46695800  |
| N | -1.53929400 | 0.17374800  | -0.10415900 |
| N | -0.24240600 | 0.09699000  | 0.39198400  |
| C | 0.61561500  | 0.73612200  | -0.53381500 |
| O | 0.34403500  | 0.85280100  | -1.73112800 |
| C | 1.87872800  | 1.36345900  | -0.03491800 |
| C | 2.94208800  | 1.46474500  | -0.94712100 |
| C | 1.99179700  | 1.97820500  | 1.22165200  |
| C | 4.11859300  | 2.11428500  | -0.59118400 |
| H | 2.83154100  | 1.00942400  | -1.92361400 |
| C | 3.16984200  | 2.64160900  | 1.56682300  |
| H | 1.16045600  | 1.96987500  | 1.91973200  |
| C | 4.23730900  | 2.70238900  | 0.67100300  |
| H | 4.94215900  | 2.16415500  | -1.29764900 |
| H | 3.24402200  | 3.12226600  | 2.53793200  |
| H | 5.15279700  | 3.21797200  | 0.94775200  |
| C | 1.80577500  | -1.97969200 | -1.10388600 |
| C | 2.51683100  | -1.79622300 | 0.08973800  |
| C | 3.88611600  | -1.59230700 | 0.06263100  |
| C | 4.53716400  | -1.55161200 | -1.17658800 |
| C | 3.81626000  | -1.73009400 | -2.36059900 |
| C | 2.43344500  | -1.94592100 | -2.34405100 |
| H | 4.44194800  | -1.44209300 | 0.98355000  |
| H | 5.60657900  | -1.37005600 | -1.21819200 |
| H | 4.33211200  | -1.68868400 | -3.31540500 |
| H | 1.87677200  | -2.05333800 | -3.26819500 |
| C | 1.55475300  | -2.01040400 | 1.24051900  |
| C | 1.72894700  | -1.15322700 | 2.49099200  |
| H | 0.93677400  | -1.36815700 | 3.21569800  |
| H | 2.68659400  | -1.38967400 | 2.96727600  |
| H | 1.70791000  | -0.09127700 | 2.27270600  |
| C | 1.72271800  | -3.50713600 | 1.65201200  |

|   |             |             |             |
|---|-------------|-------------|-------------|
| H | 2.76299100  | -3.66759600 | 1.94842800  |
| H | 1.08908100  | -3.76618400 | 2.50585200  |
| H | 1.49599000  | -4.18157600 | 0.82135100  |
| C | -0.57307200 | -2.20607600 | -1.85509600 |
| H | -0.74456700 | -1.19583400 | -2.23729700 |
| H | -0.23444600 | -2.86704700 | -2.65696000 |
| H | -1.51105400 | -2.59348100 | -1.45661300 |
| N | 0.43979900  | -2.18786600 | -0.80721100 |
| C | 0.19892000  | -1.85710800 | 0.51189900  |
| C | -1.04080900 | -2.38967500 | 1.20132400  |
| H | -1.56321500 | -3.07398000 | 0.52673100  |
| H | -0.71477700 | -2.98824000 | 2.05438500  |
| O | -0.72927200 | 1.50872200  | 2.90168700  |
| H | -1.12358900 | 2.28229600  | 2.44697900  |
| H | -0.49518400 | 0.94976300  | 2.13466300  |
| O | -1.80270800 | 2.76223400  | -1.72364200 |
| H | -1.39776400 | 1.87280900  | -1.76593200 |
| H | -2.00601100 | 2.85312300  | -0.76882300 |
| O | 0.36652400  | 4.16941600  | -0.82760600 |
| H | -0.29534700 | 3.74961100  | -1.43214100 |
| H | 1.12917600  | 3.56997600  | -0.85214600 |
| O | -1.47128800 | 3.51113100  | 1.02728600  |
| H | -0.66036600 | 3.80973300  | 0.53034000  |
| H | -1.93962400 | 4.33086700  | 1.24567600  |

#### PC-4H<sub>2</sub>O

|   |             |             |             |
|---|-------------|-------------|-------------|
| C | -5.43942900 | -0.00605700 | -1.63907100 |
| C | -4.10535000 | -0.18939700 | -1.29042800 |
| C | -3.75997300 | -0.63415800 | -0.00339100 |
| C | -4.78591400 | -0.89662100 | 0.91781000  |
| C | -6.12155500 | -0.70989500 | 0.56617100  |
| C | -6.45350600 | -0.26716100 | -0.71416200 |
| H | -5.68807500 | 0.33907600  | -2.63846100 |
| H | -3.32284200 | 0.02260400  | -2.00768600 |
| H | -4.54170000 | -1.22115900 | 1.92423000  |
| H | -6.90201000 | -0.90793600 | 1.29537400  |
| H | -7.49464300 | -0.12655500 | -0.99049300 |
| C | -2.34674400 | -0.80492800 | 0.39006300  |
| C | -1.93441200 | -1.73742100 | 1.48931000  |
| H | -2.74435000 | -2.41094000 | 1.77575800  |
| H | -1.65956500 | -1.14684200 | 2.37162500  |
| N | -1.45014900 | -0.14503600 | -0.25612000 |
| N | -0.11974300 | -0.24639500 | 0.21833700  |
| C | 0.67290000  | 0.61634800  | -0.64835700 |
| O | 0.40400400  | 0.73381400  | -1.83252800 |
| C | 1.74059700  | 1.47612200  | -0.06733000 |
| C | 2.85861100  | 1.73732600  | -0.87544300 |
| C | 1.58405700  | 2.16599200  | 1.14470300  |
| C | 3.83862800  | 2.62516600  | -0.44984000 |
| H | 2.95501200  | 1.21223100  | -1.81785000 |
| C | 2.56037500  | 3.07703900  | 1.55156900  |
| H | 0.70107600  | 2.02236400  | 1.75922300  |
| C | 3.69180400  | 3.29829100  | 0.76646500  |
| H | 4.71491100  | 2.79681200  | -1.06775200 |
| H | 2.42717200  | 3.61676700  | 2.48426400  |
| H | 4.45222700  | 4.00145000  | 1.09429600  |
| C | 2.24133500  | -1.82378000 | -1.00561500 |
| C | 2.77343900  | -1.47748500 | 0.24875900  |
| C | 4.09316000  | -1.08163700 | 0.37109300  |
| C | 4.88935600  | -1.00069600 | -0.77997400 |
| C | 4.35230000  | -1.33389800 | -2.02540600 |
| C | 3.02033200  | -1.74612200 | -2.15948400 |
| H | 4.49986500  | -0.81260000 | 1.34212200  |

|   |             |             |             |
|---|-------------|-------------|-------------|
| H | 5.92079500  | -0.67080600 | -0.70382200 |
| H | 4.97261100  | -1.26234200 | -2.91459300 |
| H | 2.60995500  | -1.97869900 | -3.13610700 |
| C | 1.71550900  | -1.76767100 | 1.29758700  |
| C | 1.69631200  | -0.88142700 | 2.54030600  |
| H | 0.82142200  | -1.10148300 | 3.16111900  |
| H | 2.58651200  | -1.08528200 | 3.14570400  |
| H | 1.69001900  | 0.17870600  | 2.30901900  |
| C | 1.99315800  | -3.22544500 | 1.76258700  |
| H | 3.03346900  | -3.28544100 | 2.09467300  |
| H | 1.36287300  | -3.51577500 | 2.60976400  |
| H | 1.85270900  | -3.94254900 | 0.94949200  |
| C | 0.05032900  | -2.36429600 | -2.03483500 |
| H | -0.17440300 | -1.40169100 | -2.50569100 |
| H | 0.54799900  | -3.01973500 | -2.75584400 |
| H | -0.89000600 | -2.83988200 | -1.75014500 |
| N | 0.90678000  | -2.22458600 | -0.86745400 |
| C | 0.41043100  | -1.71508200 | 0.40912100  |
| C | -0.75215600 | -2.55697000 | 0.96936300  |
| H | -1.11593400 | -3.22424100 | 0.18460000  |
| H | -0.38053700 | -3.20139500 | 1.76354800  |
| O | -1.09988000 | 1.17805400  | 2.71590400  |
| H | -1.68019200 | 1.77276600  | 2.19009500  |
| H | -0.67030800 | 0.65336300  | 2.01853500  |
| O | -2.07236800 | 2.26926500  | -1.96373000 |
| H | -1.52906000 | 1.46004300  | -1.91967900 |
| H | -2.52570300 | 2.25476500  | -1.09649600 |
| O | -0.47777600 | 4.02291700  | -0.64238500 |
| H | -0.91028700 | 3.49413100  | -1.36209600 |
| H | 0.40488700  | 3.63388900  | -0.54067600 |
| O | -2.37470700 | 2.85324100  | 0.85498600  |
| H | -1.60569800 | 3.36842500  | 0.48316300  |
| H | -3.01215300 | 3.52492100  | 1.14005200  |

### 2a-4H<sub>2</sub>O

|   |             |             |             |
|---|-------------|-------------|-------------|
| C | -4.76548000 | 1.25750700  | -0.01594000 |
| C | -3.47178000 | 0.75644600  | 0.12062200  |
| C | -3.21251300 | -0.59893400 | -0.13654000 |
| C | -4.26697600 | -1.42899300 | -0.54825700 |
| C | -5.55698500 | -0.92257600 | -0.68129500 |
| C | -5.81103300 | 0.42405700  | -0.41416000 |
| H | -4.95341000 | 2.30672100  | 0.19279200  |
| H | -2.67473600 | 1.41715200  | 0.44230000  |
| H | -4.06548500 | -2.46900000 | -0.78717300 |
| H | -6.36118300 | -1.57675100 | -1.00581600 |
| H | -6.81603300 | 0.82159000  | -0.52333700 |
| C | -1.85713500 | -1.17396500 | 0.02017000  |
| C | -1.59893500 | -2.40366000 | 0.50368600  |
| H | -2.40569800 | -3.04458900 | 0.84158600  |
| H | -0.57934400 | -2.74949500 | 0.61689100  |
| N | -0.78936600 | -0.27865200 | -0.28714700 |
| N | 0.24008200  | -0.82264300 | -0.74159700 |
| C | 1.28763800  | 0.12827800  | -1.05403800 |
| O | 1.02258400  | 1.19860700  | -1.58424500 |
| C | 2.65630100  | -0.34154300 | -0.77509900 |
| C | 3.73351900  | 0.38177200  | -1.31371300 |
| C | 2.89705500  | -1.45453100 | 0.04531500  |
| C | 5.03855700  | -0.00640500 | -1.03853300 |
| H | 3.52996000  | 1.23202800  | -1.95624200 |
| C | 4.20864600  | -1.82807400 | 0.32846200  |
| H | 2.06617200  | -1.98448600 | 0.49475300  |
| C | 5.27649500  | -1.11175800 | -0.21495100 |
| H | 5.87055500  | 0.54811400  | -1.46182400 |

|   |             |             |             |
|---|-------------|-------------|-------------|
| H | 4.39568100  | -2.67856500 | 0.97677600  |
| H | 6.29746000  | -1.41231200 | 0.00340000  |
| O | 0.81005100  | -1.40981700 | 2.37341800  |
| H | 1.09866000  | -0.48410900 | 2.22900400  |
| H | -0.14764200 | -1.33270000 | 2.49392100  |
| O | -0.69458300 | 2.64318200  | 0.64252800  |
| H | -0.70500600 | 1.95369800  | -0.04923400 |
| H | -0.29392000 | 2.16149700  | 1.39621300  |
| O | 1.98885900  | 3.13893700  | 0.23317000  |
| H | 1.02096100  | 3.32308400  | 0.28511900  |
| H | 2.04755900  | 2.65806100  | -0.61196200 |
| O | 1.33667900  | 1.35064900  | 2.11786600  |
| H | 1.79481600  | 1.92055000  | 1.43549900  |
| H | 1.67264900  | 1.66037700  | 2.97228000  |



## 7. <sup>1</sup>H NMR and <sup>13</sup>C NMR Spectra

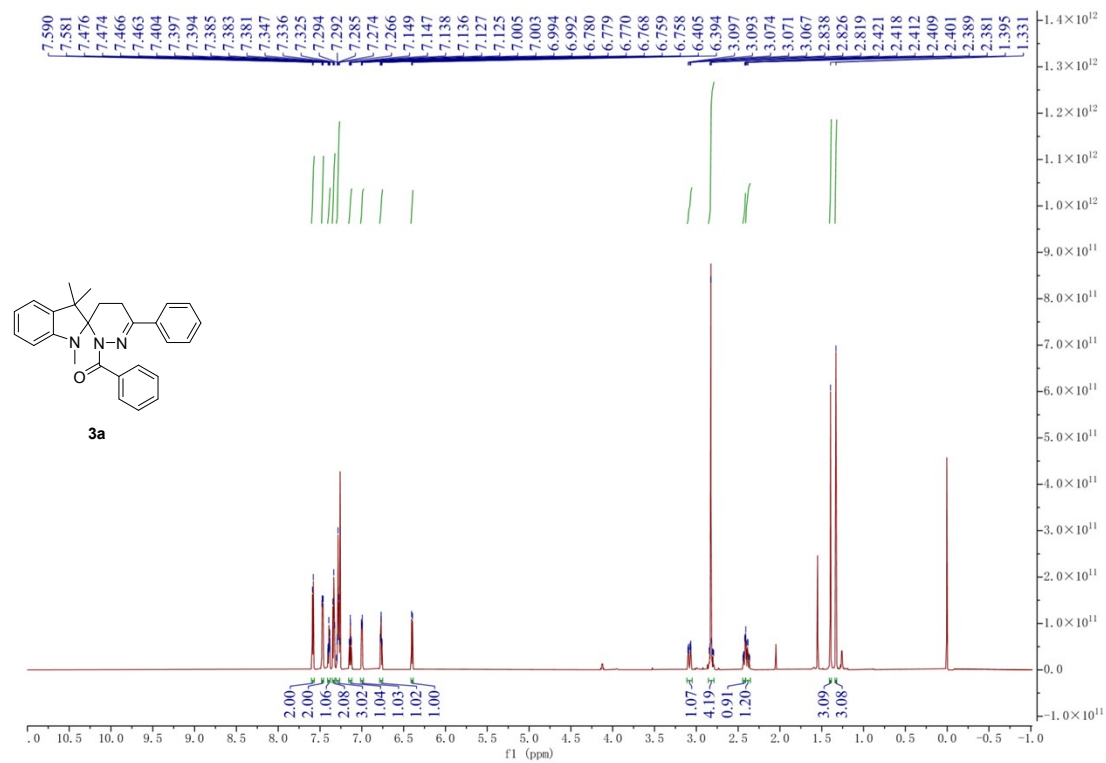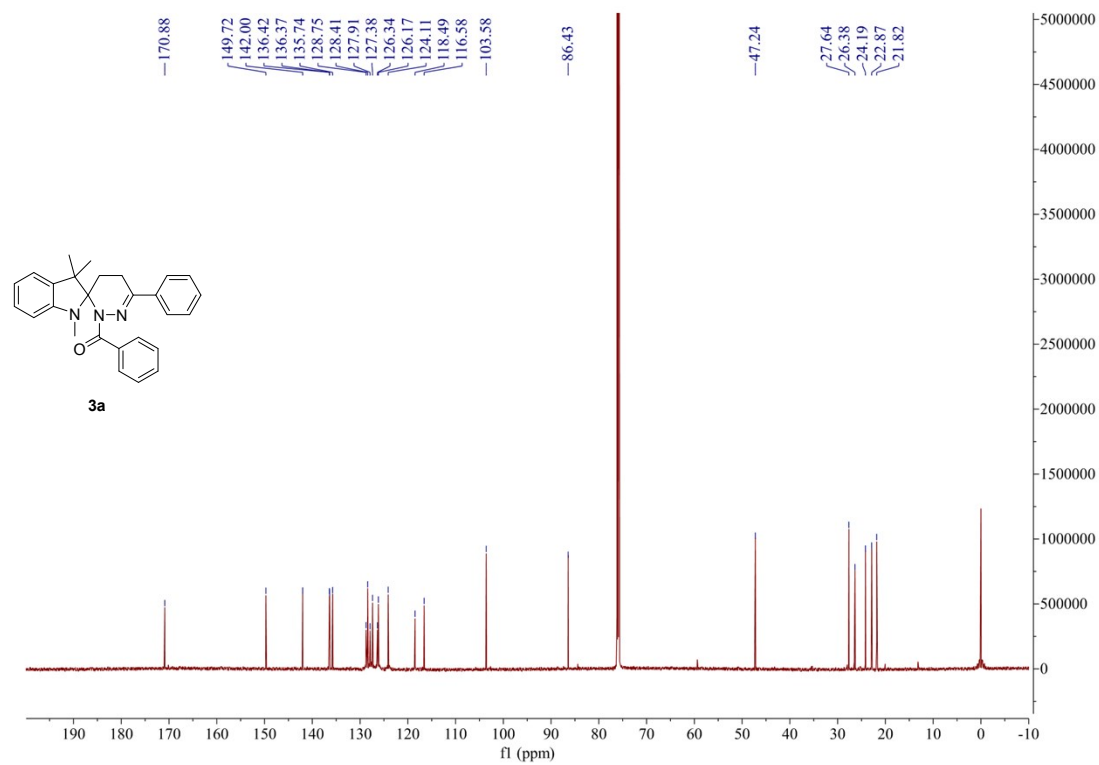

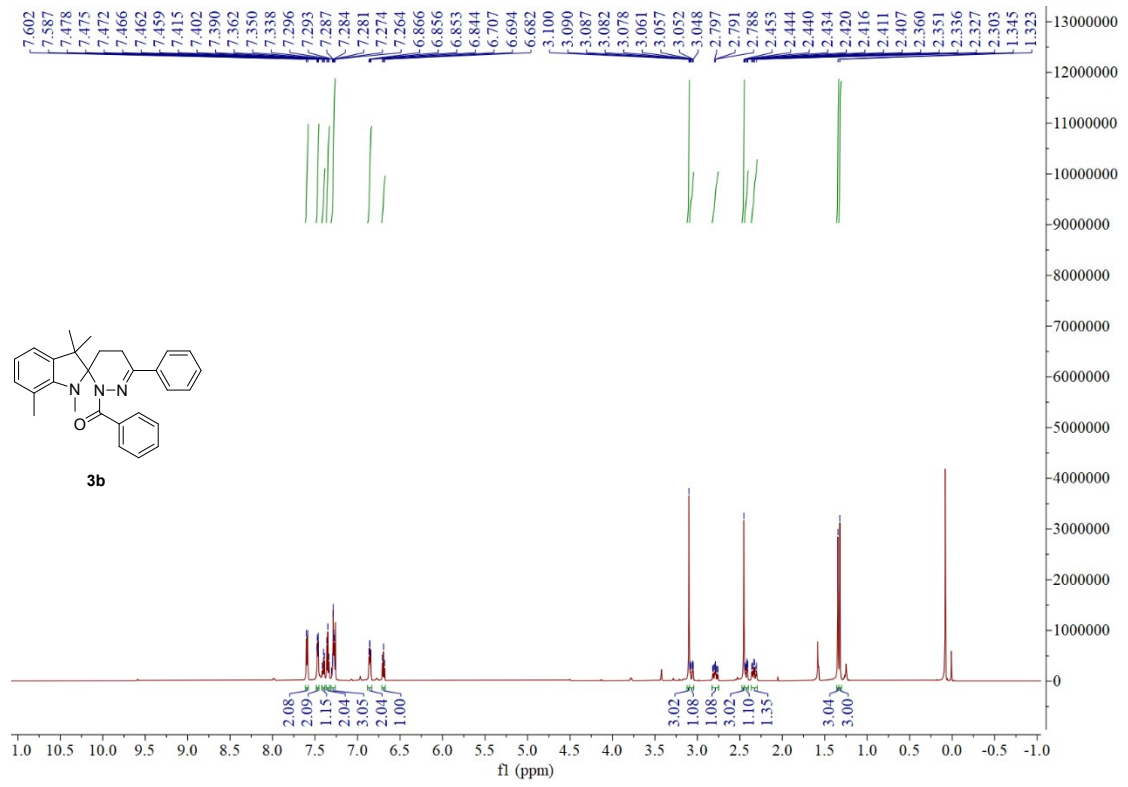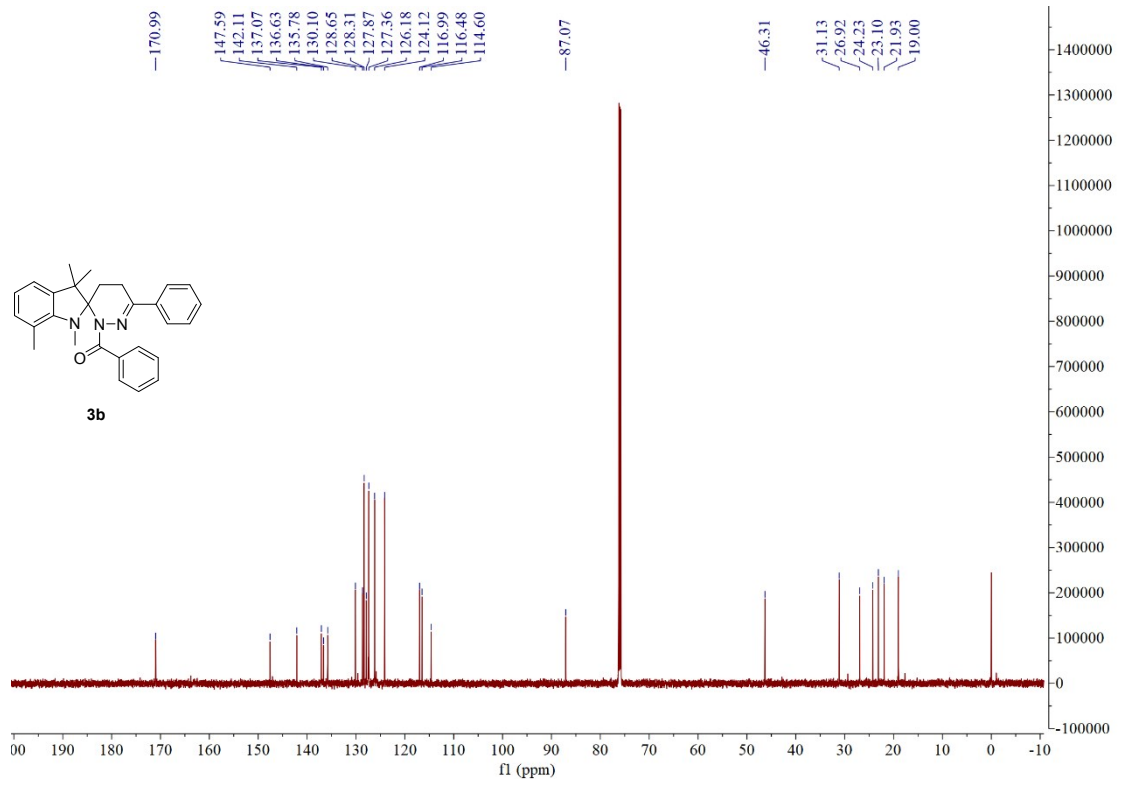

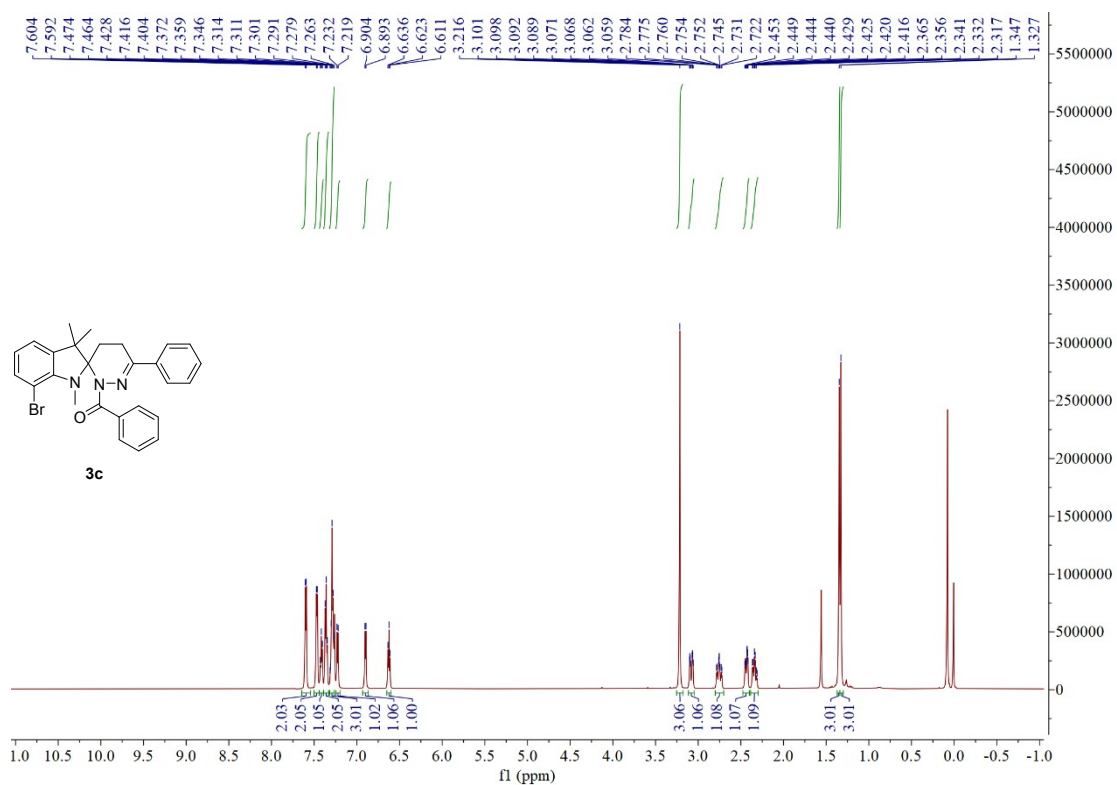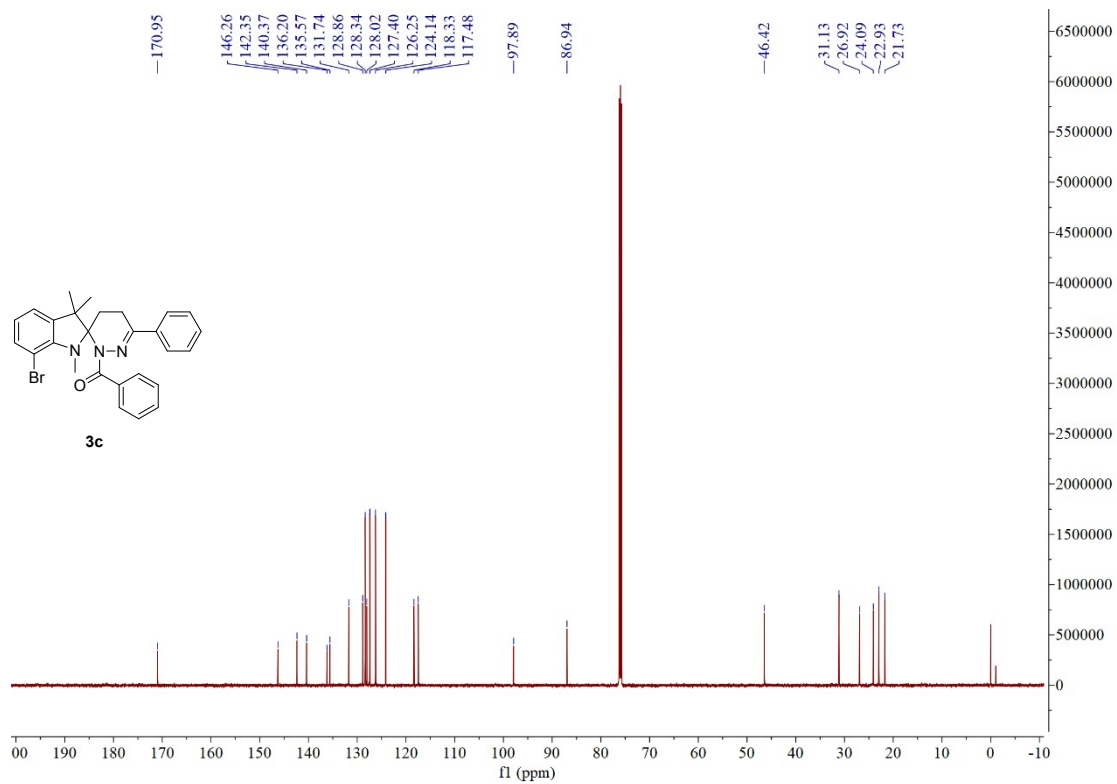

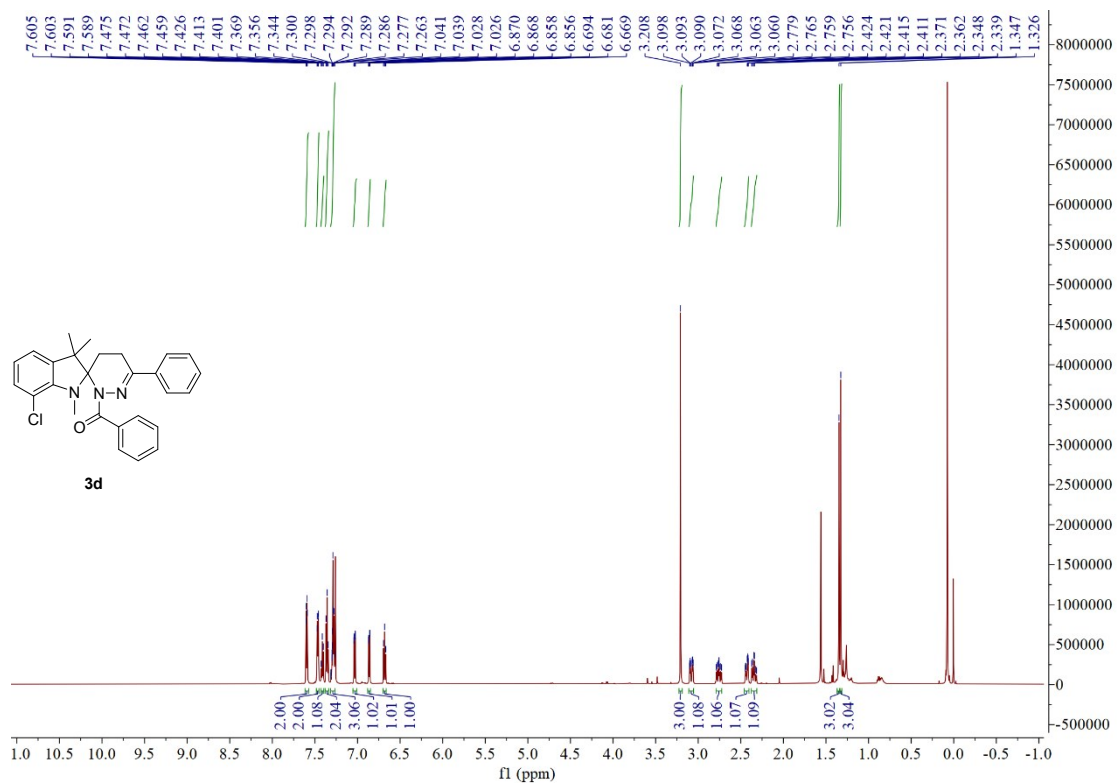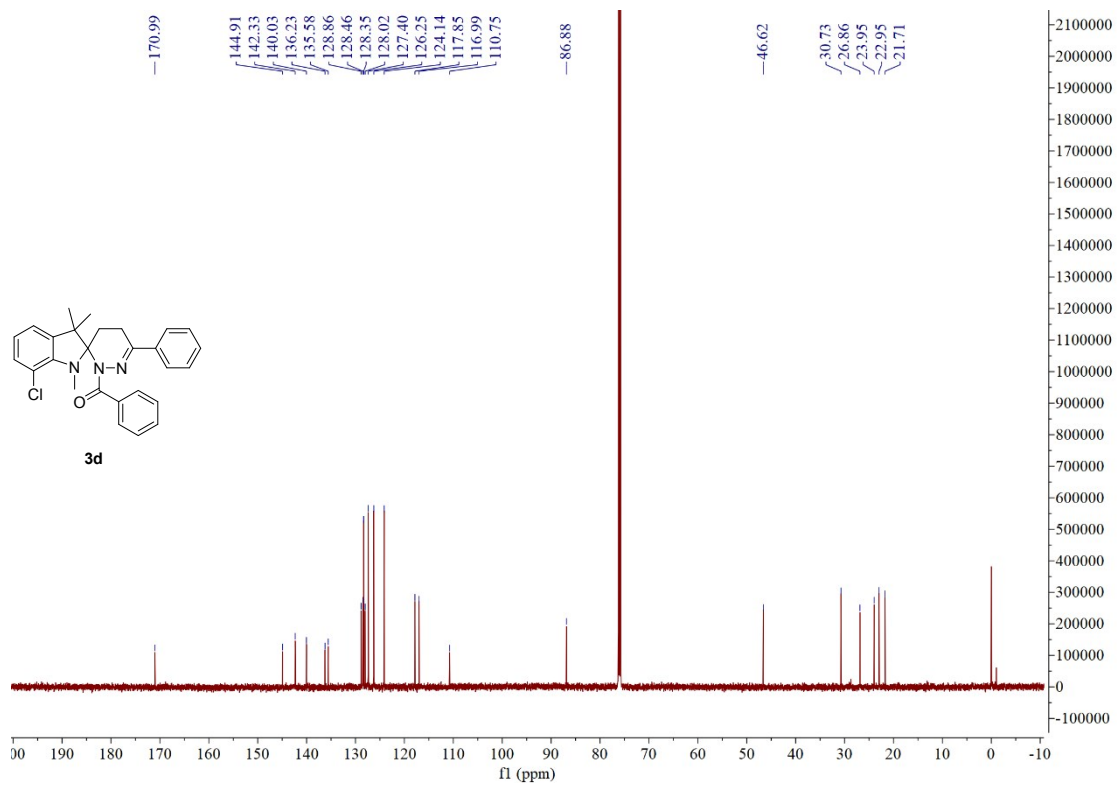

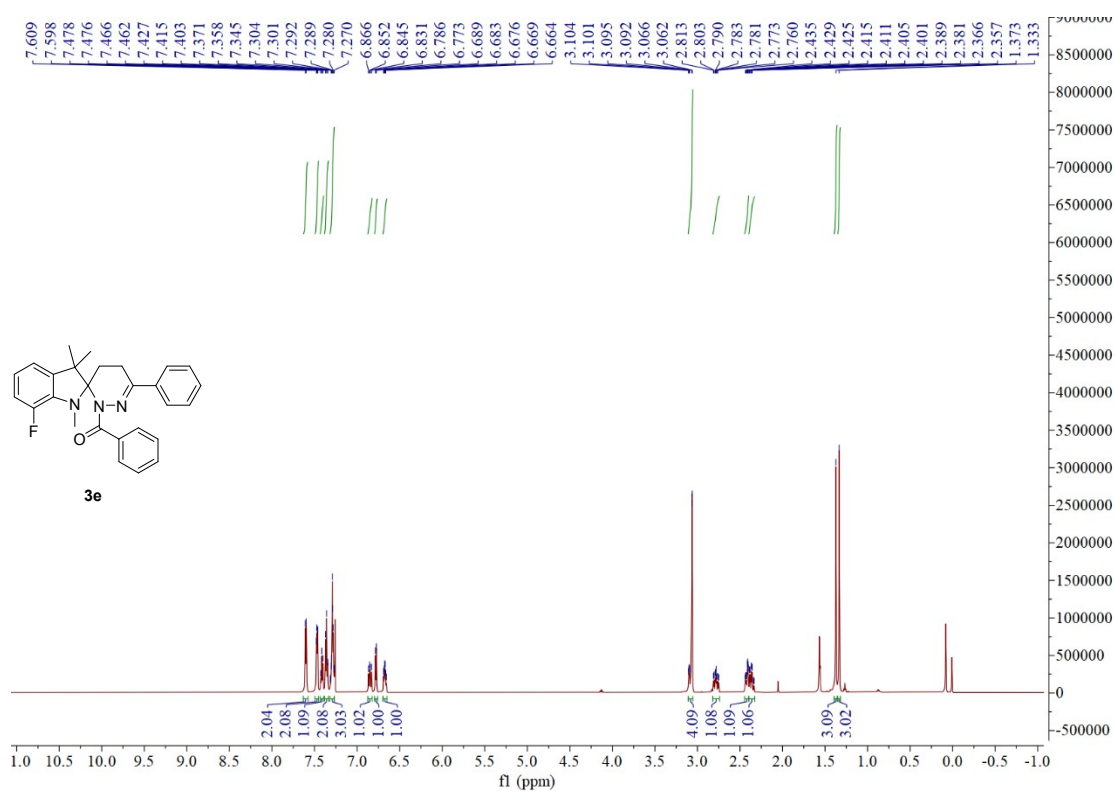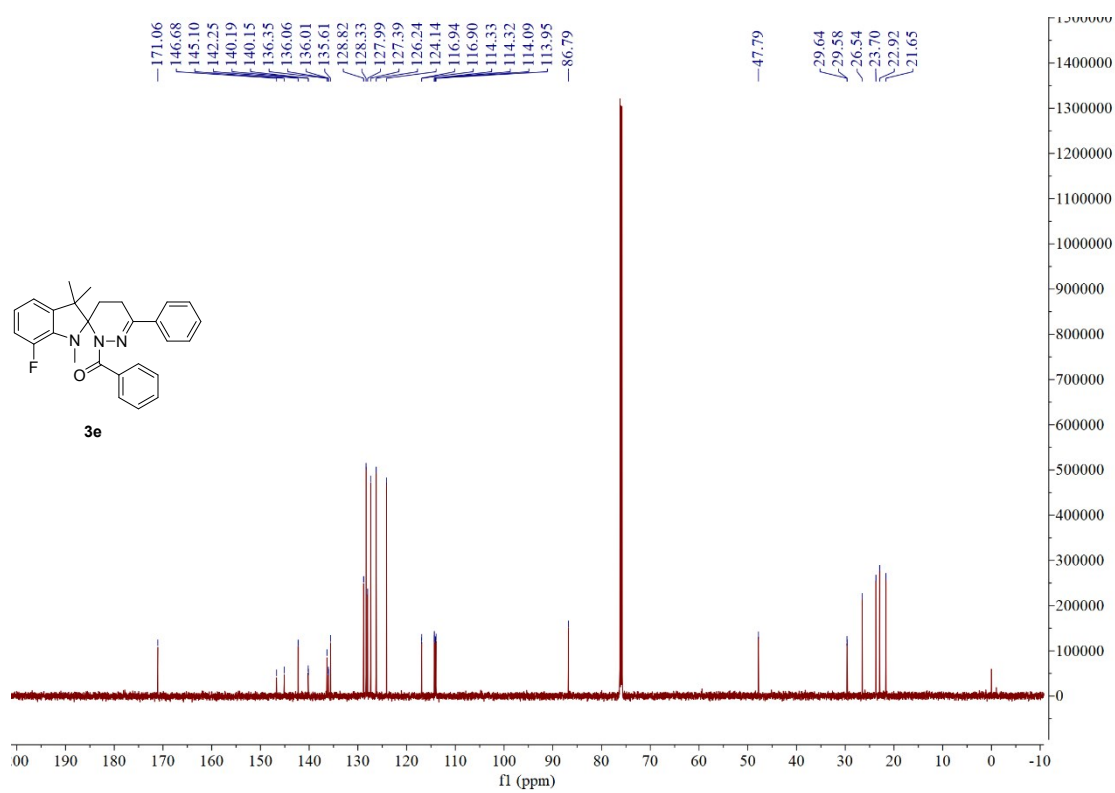

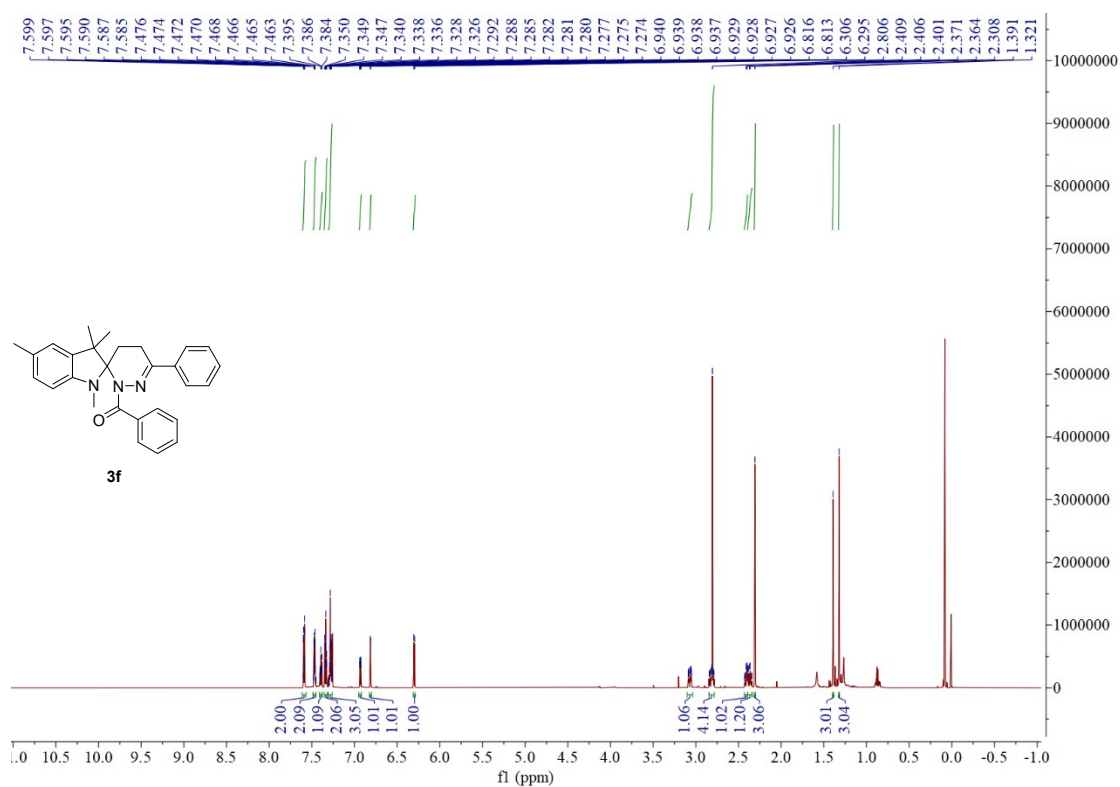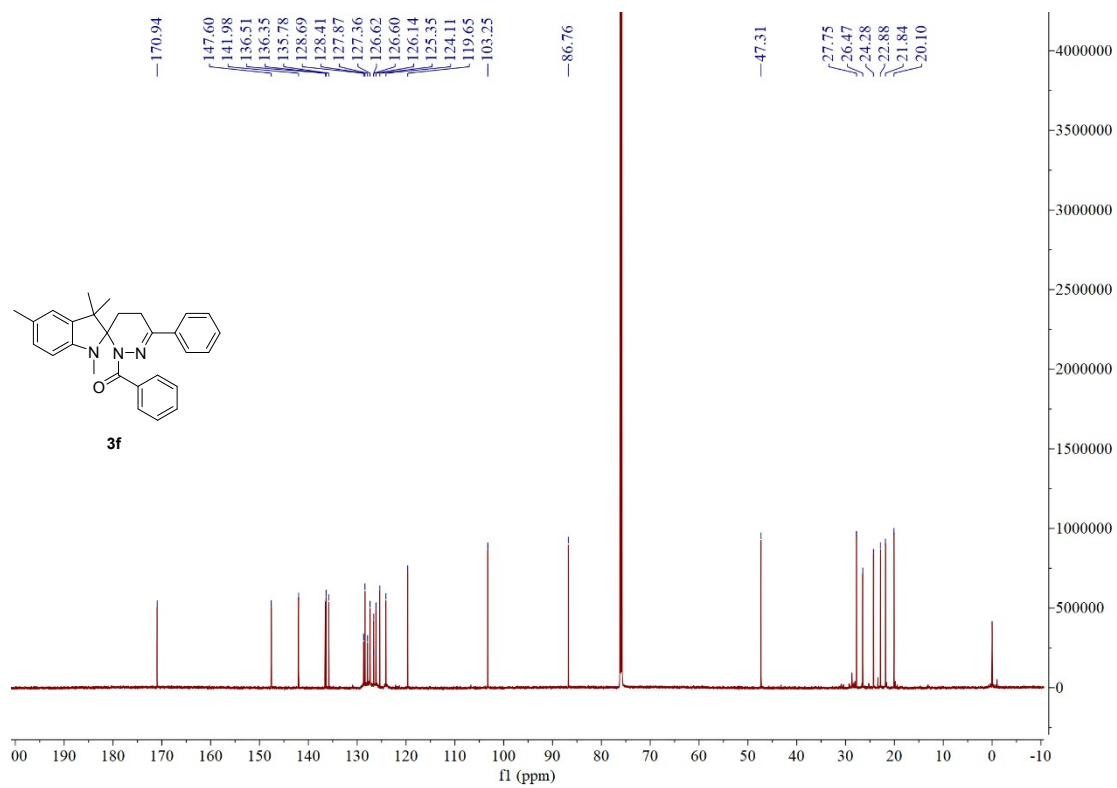

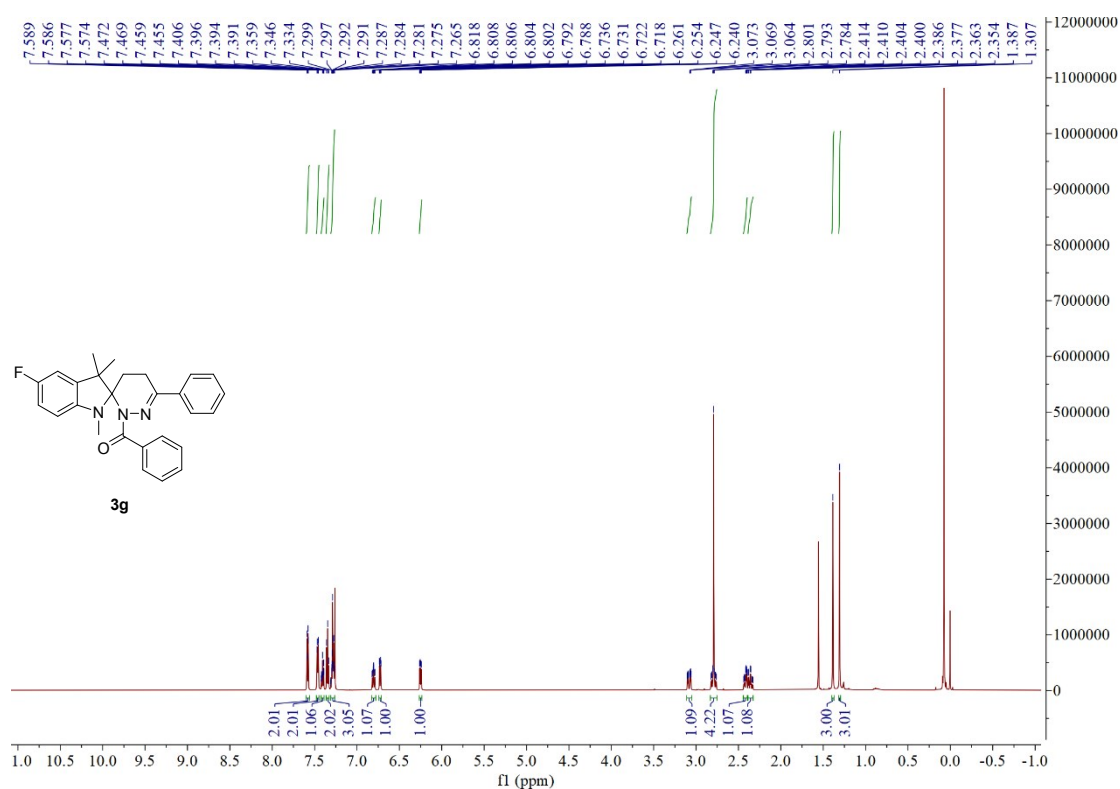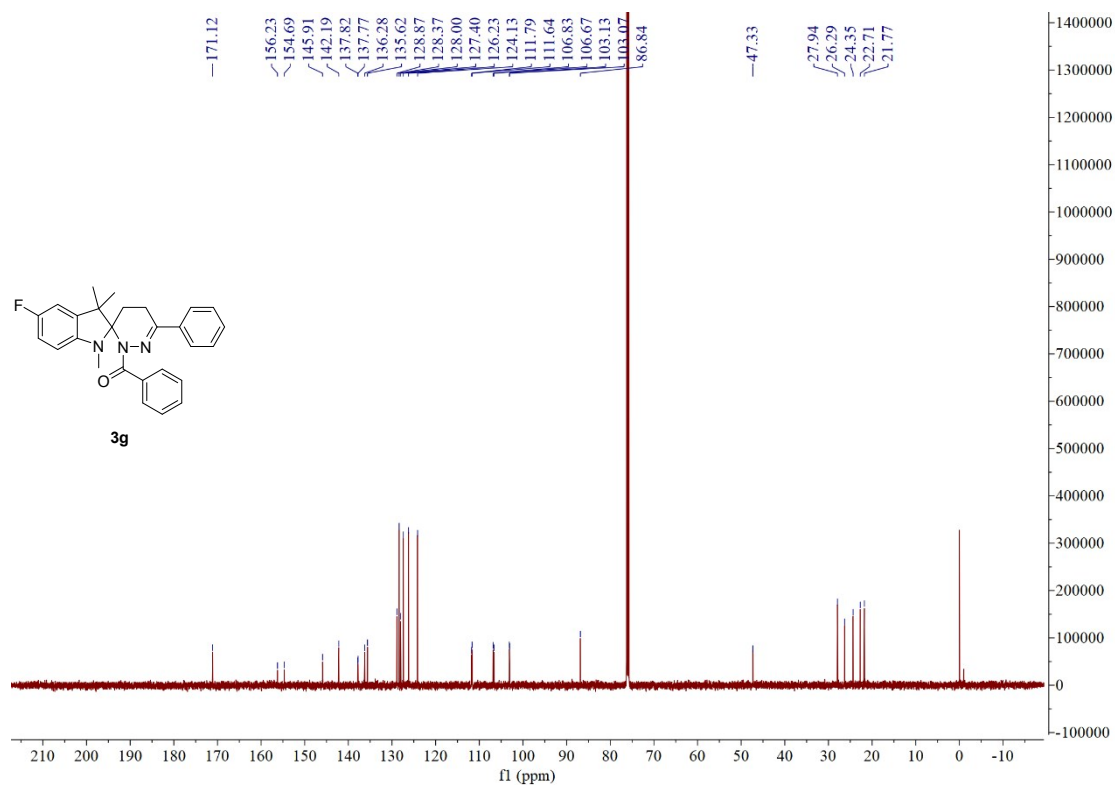

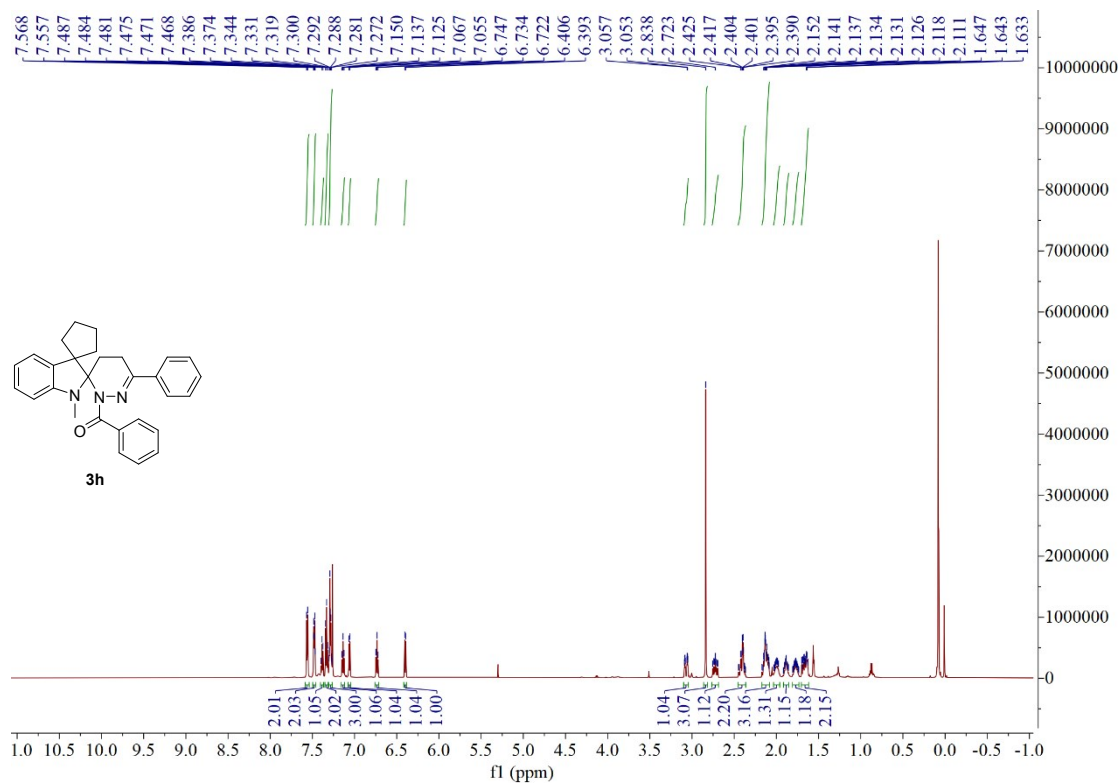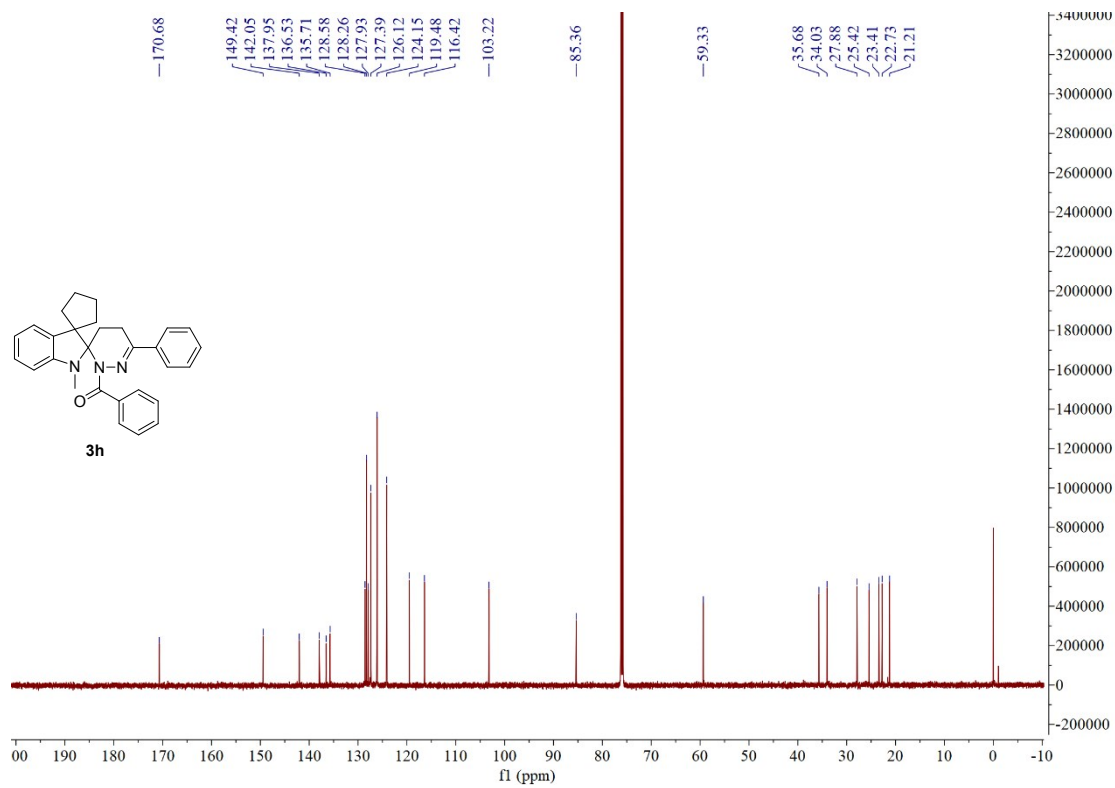



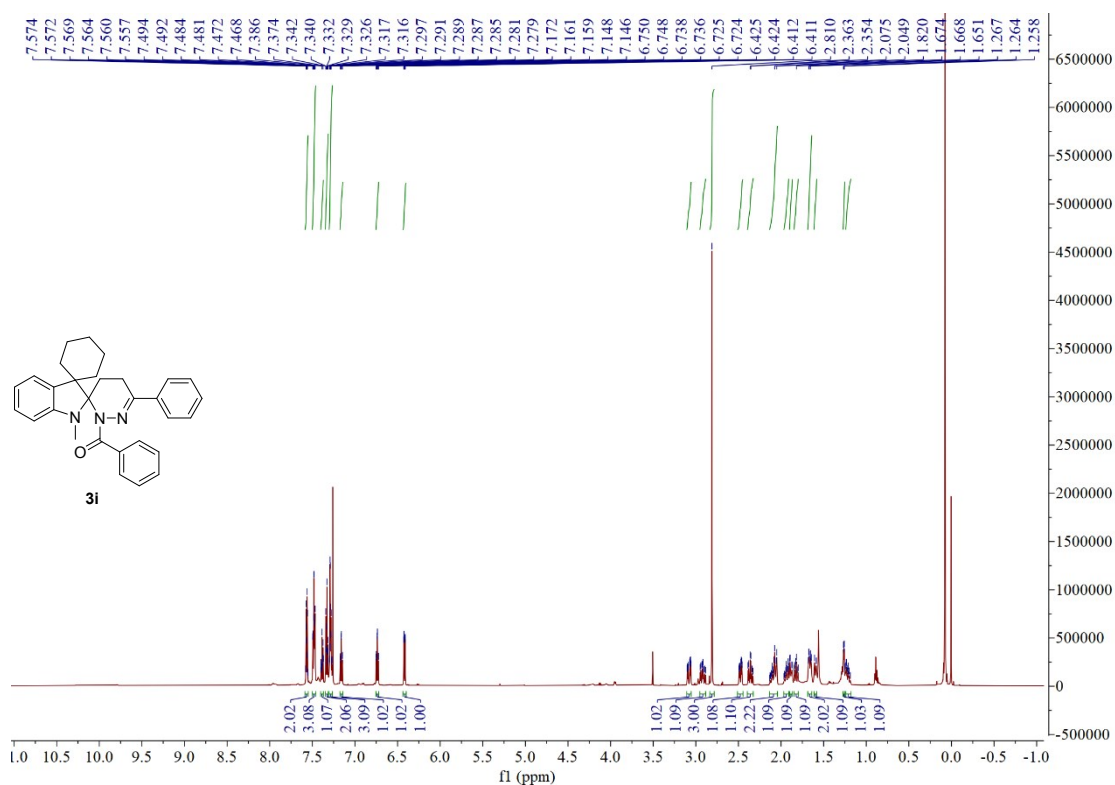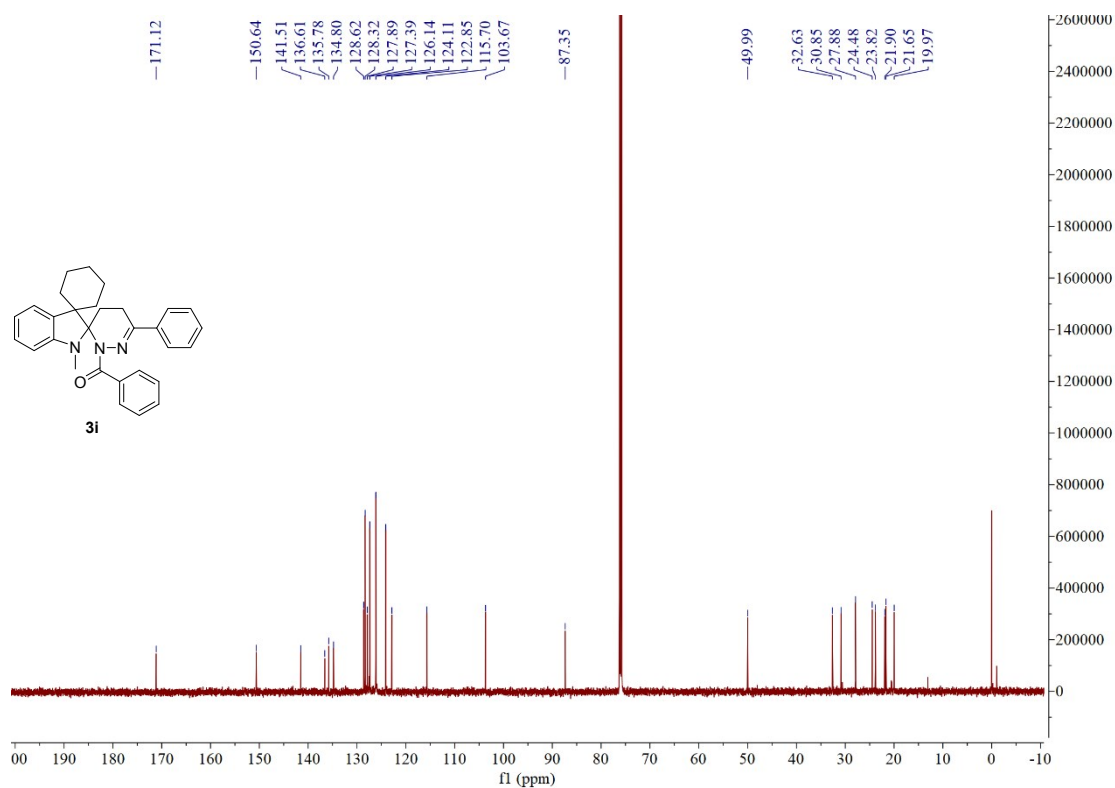

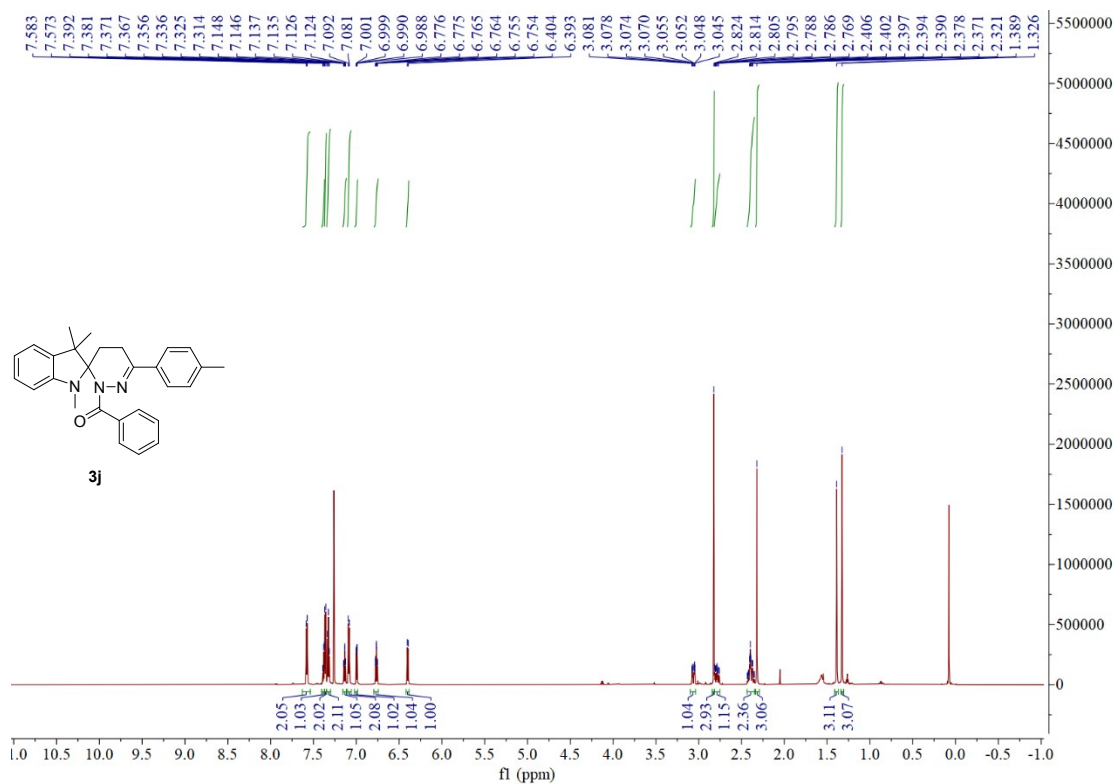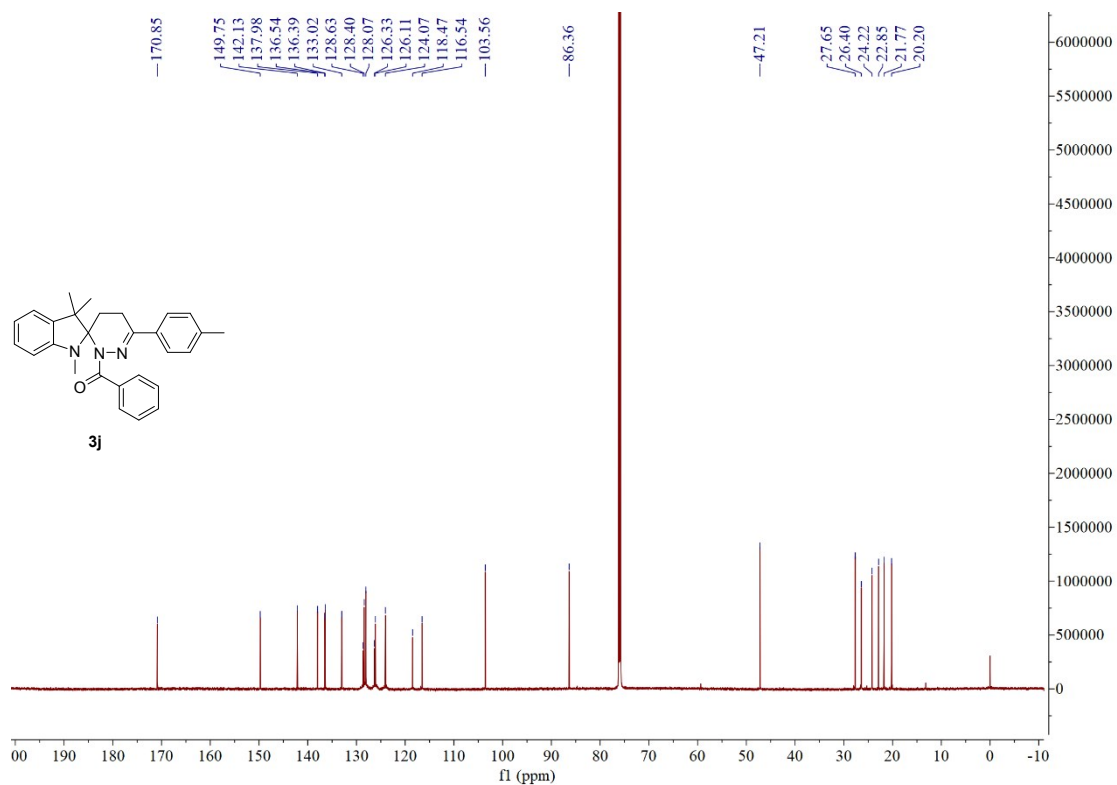

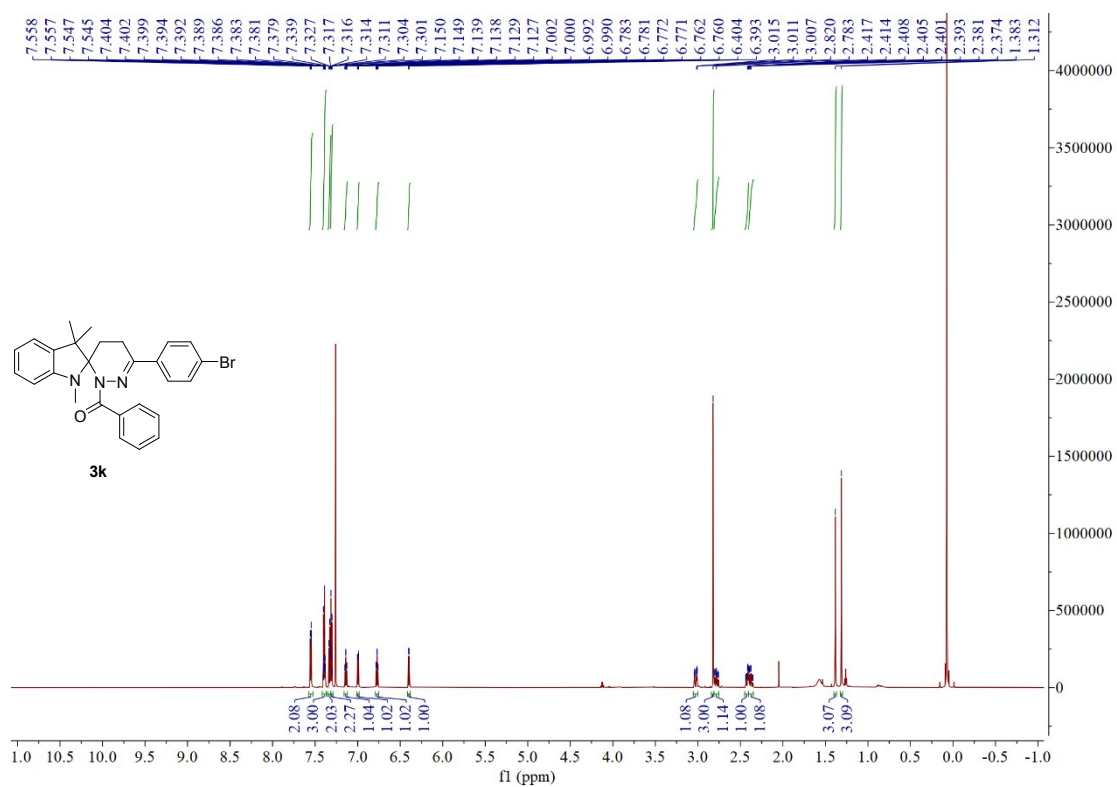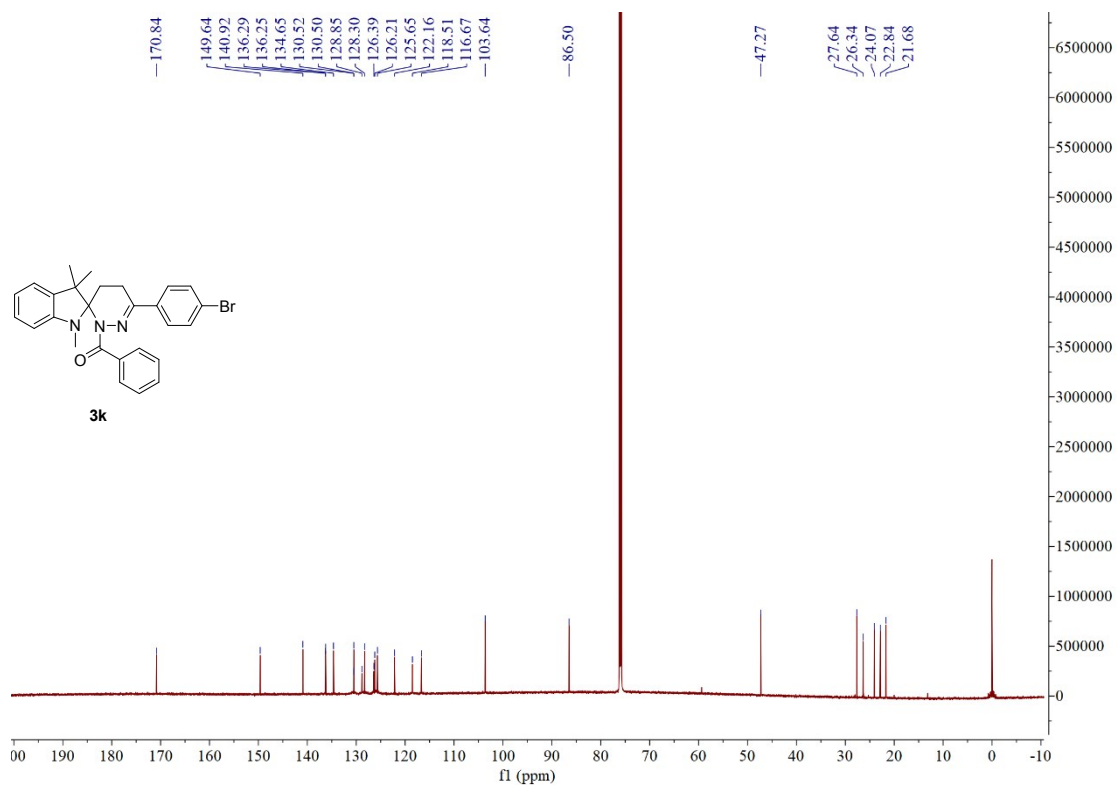

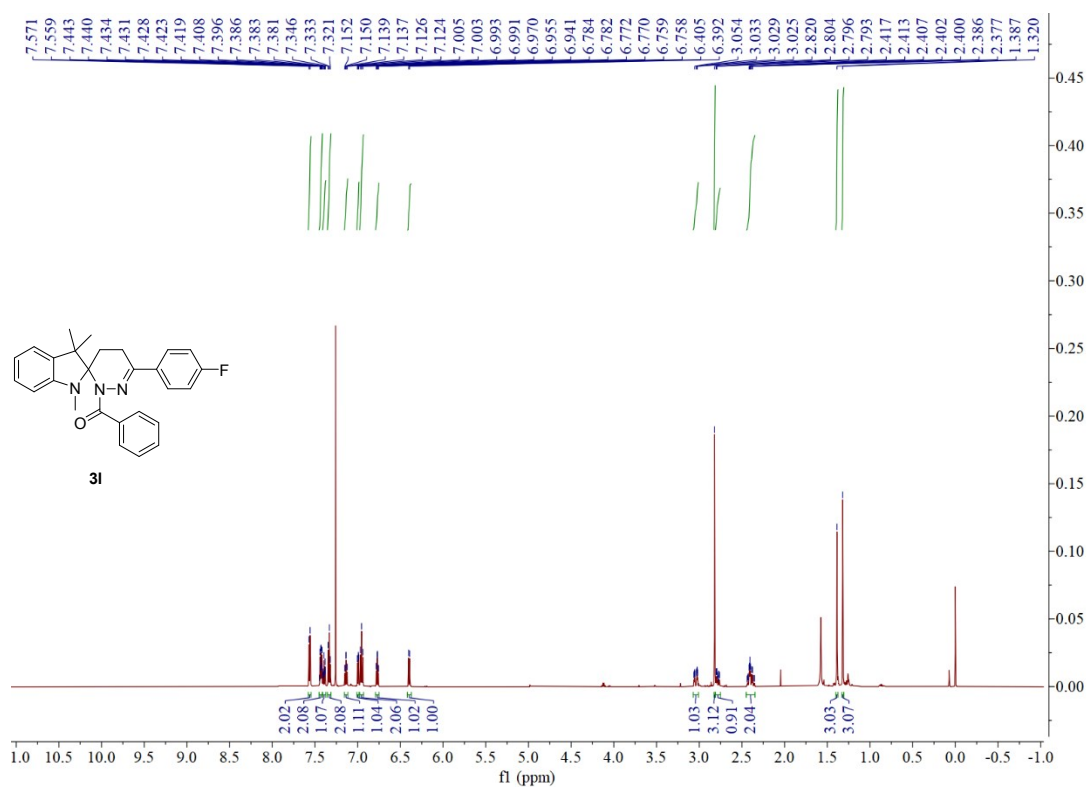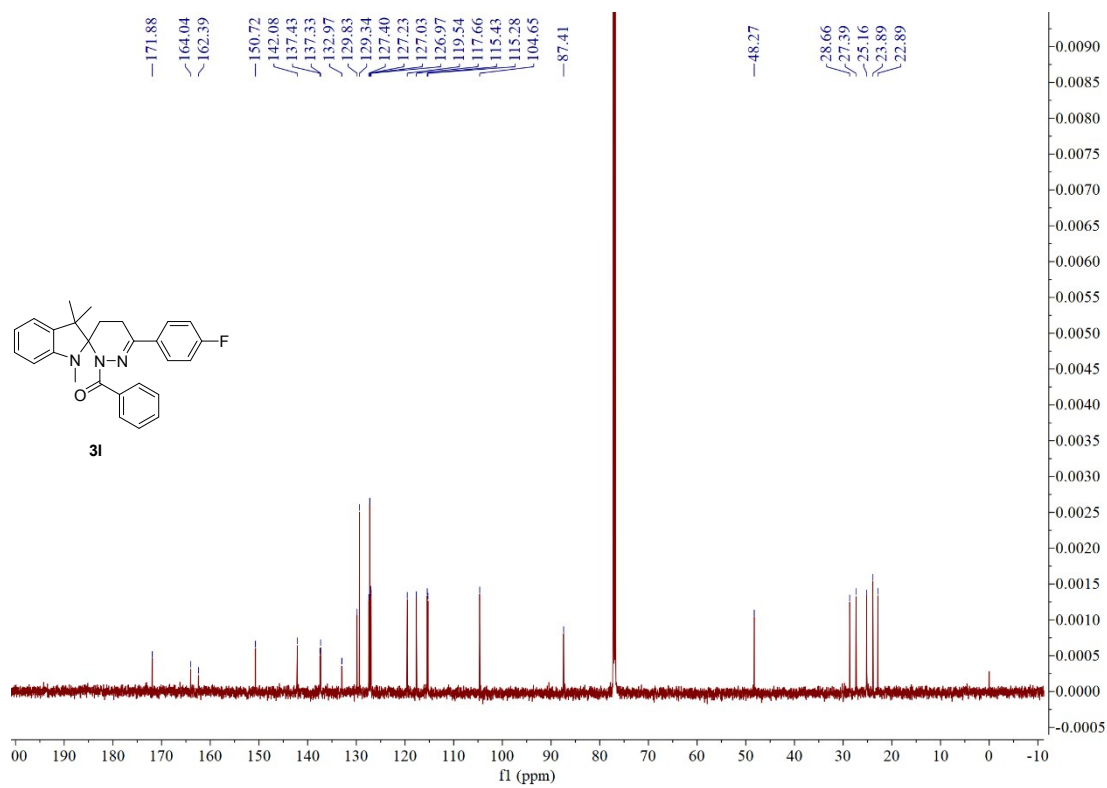

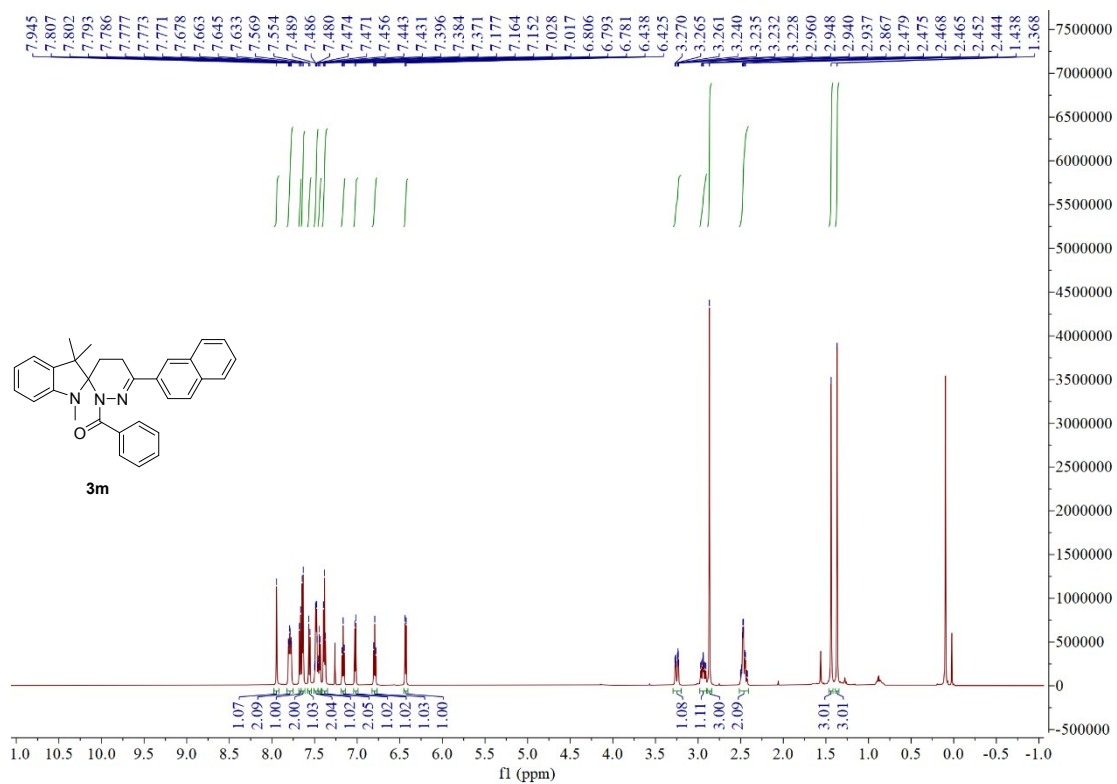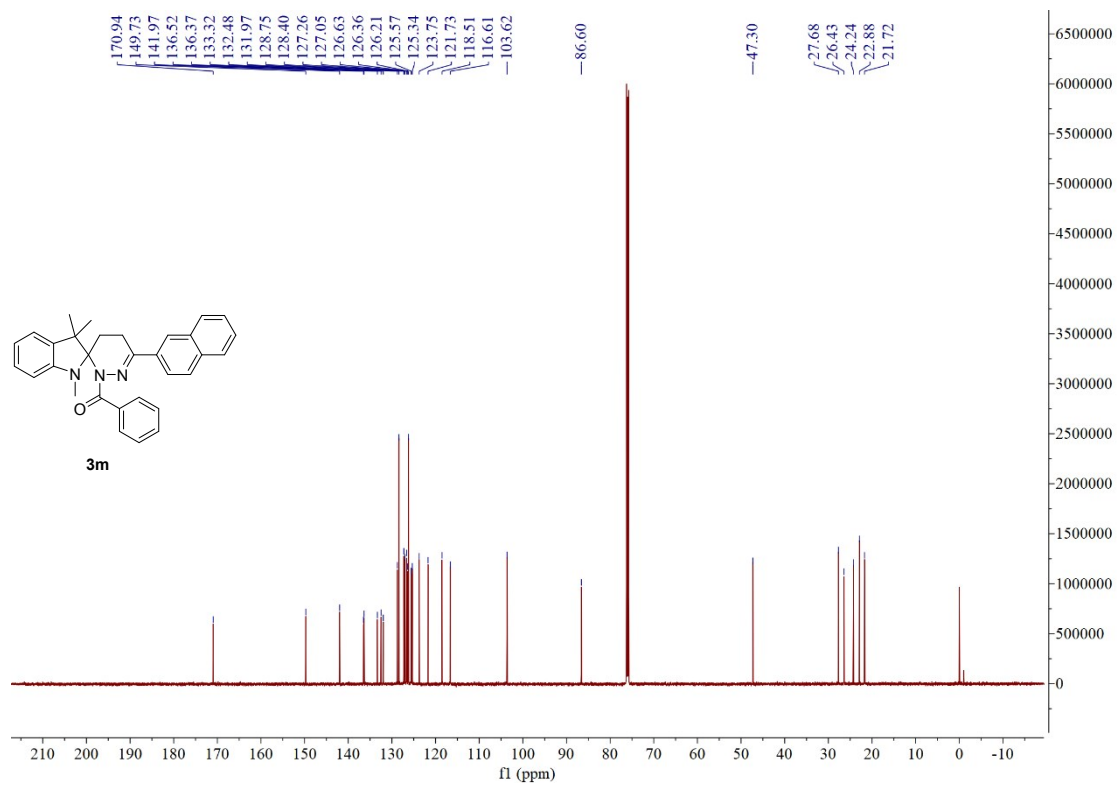

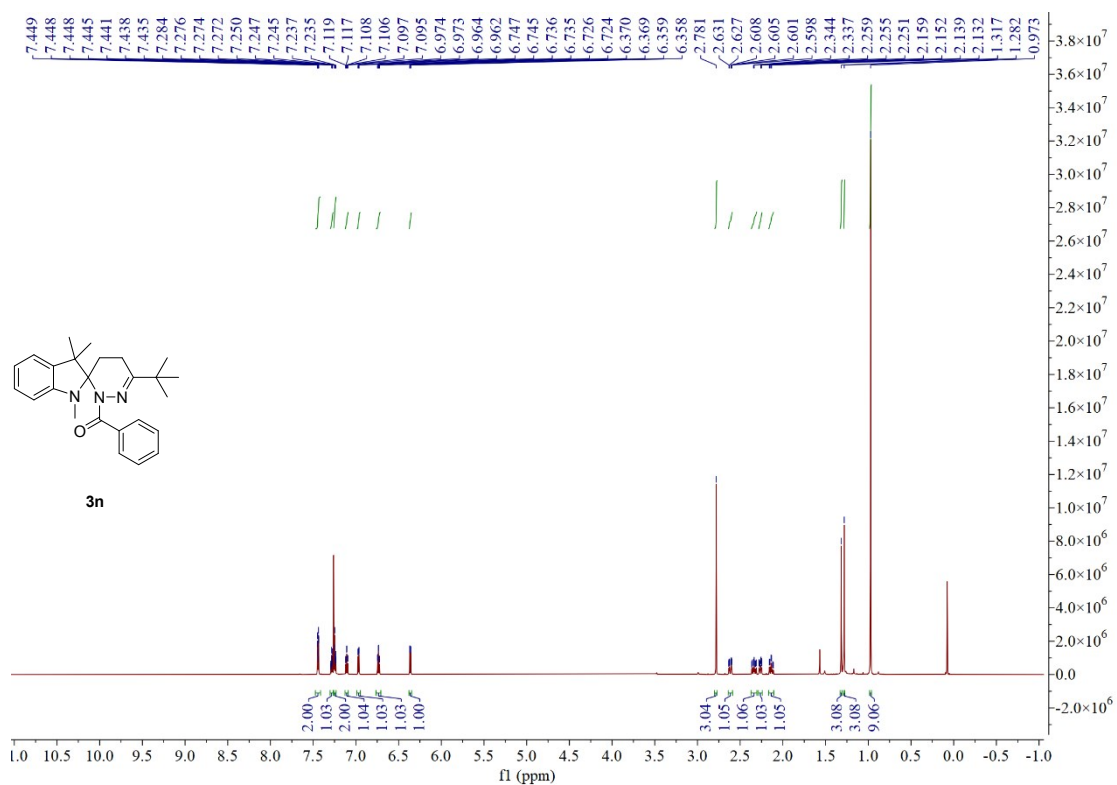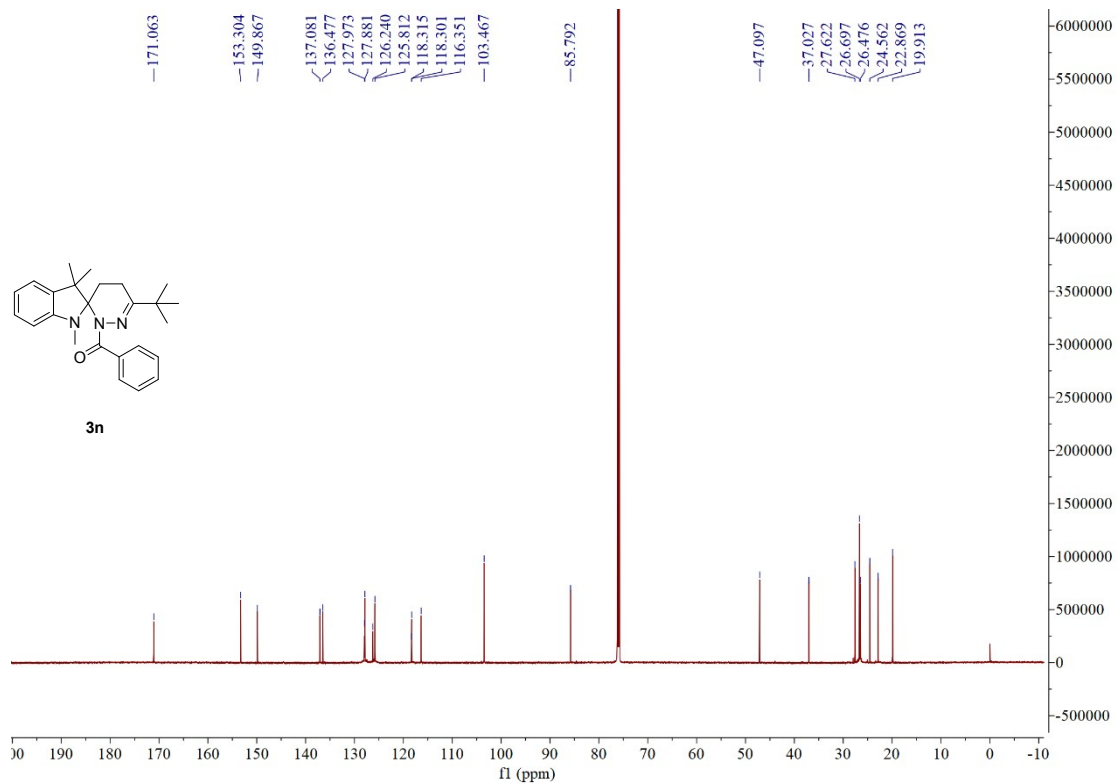

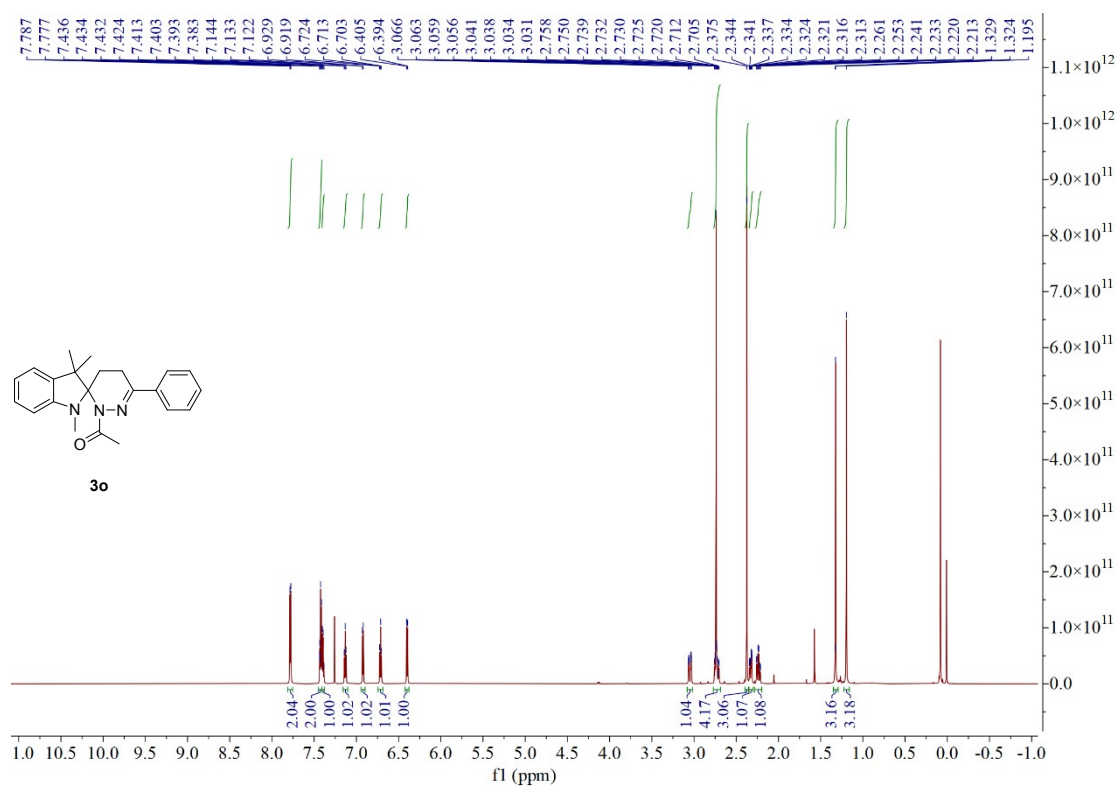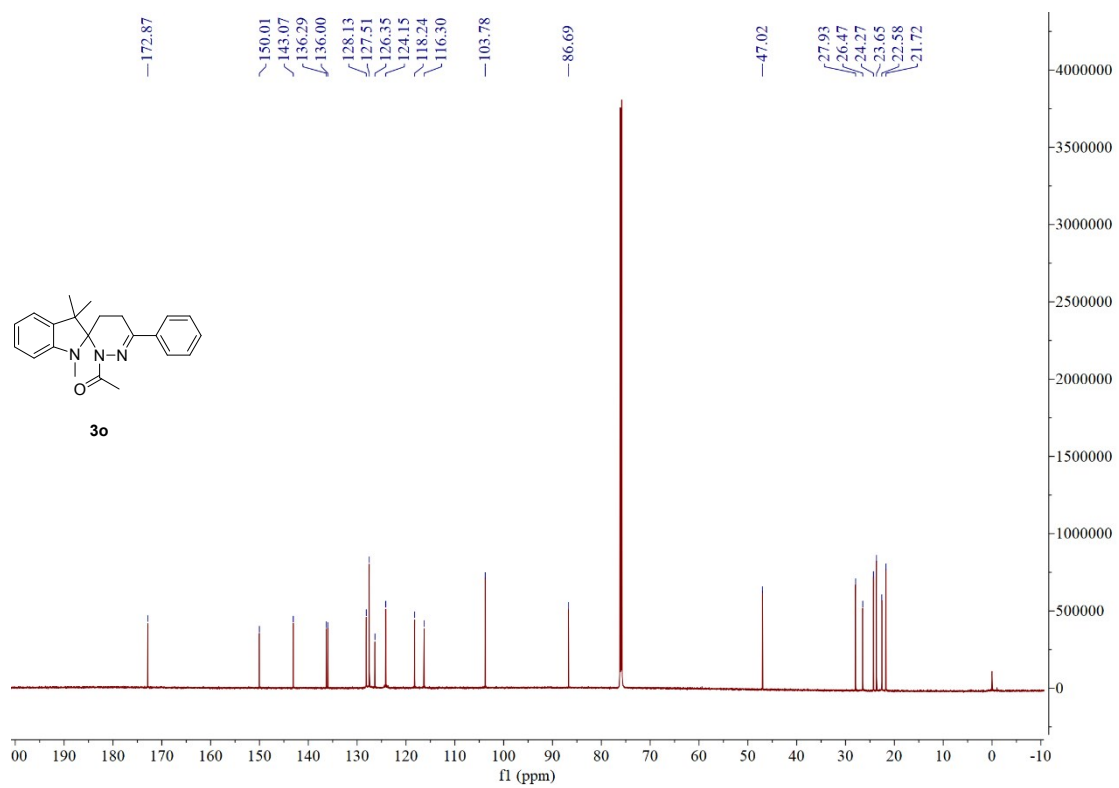

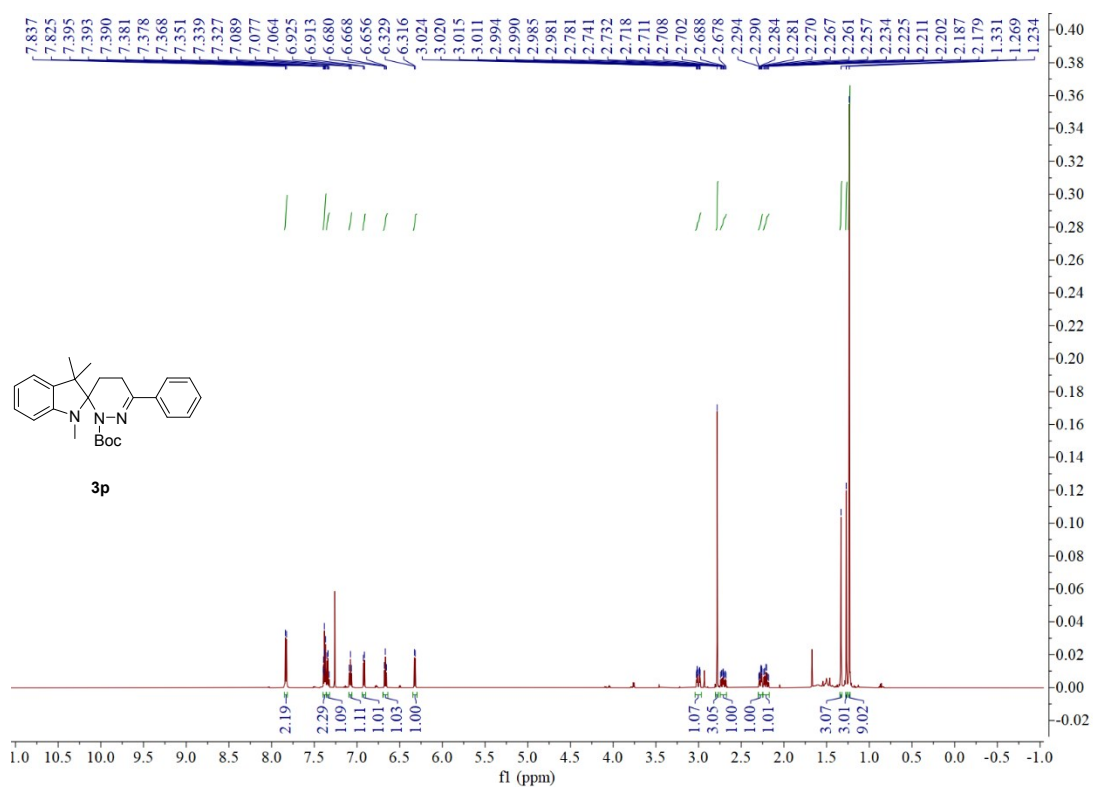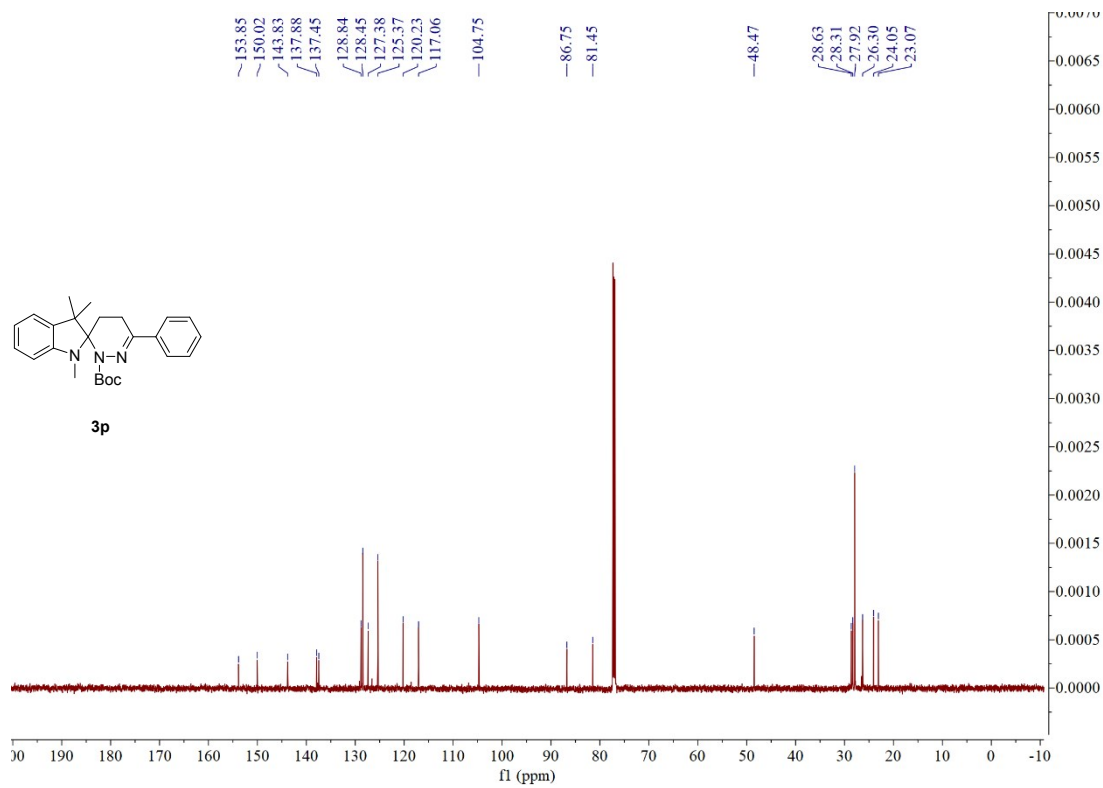



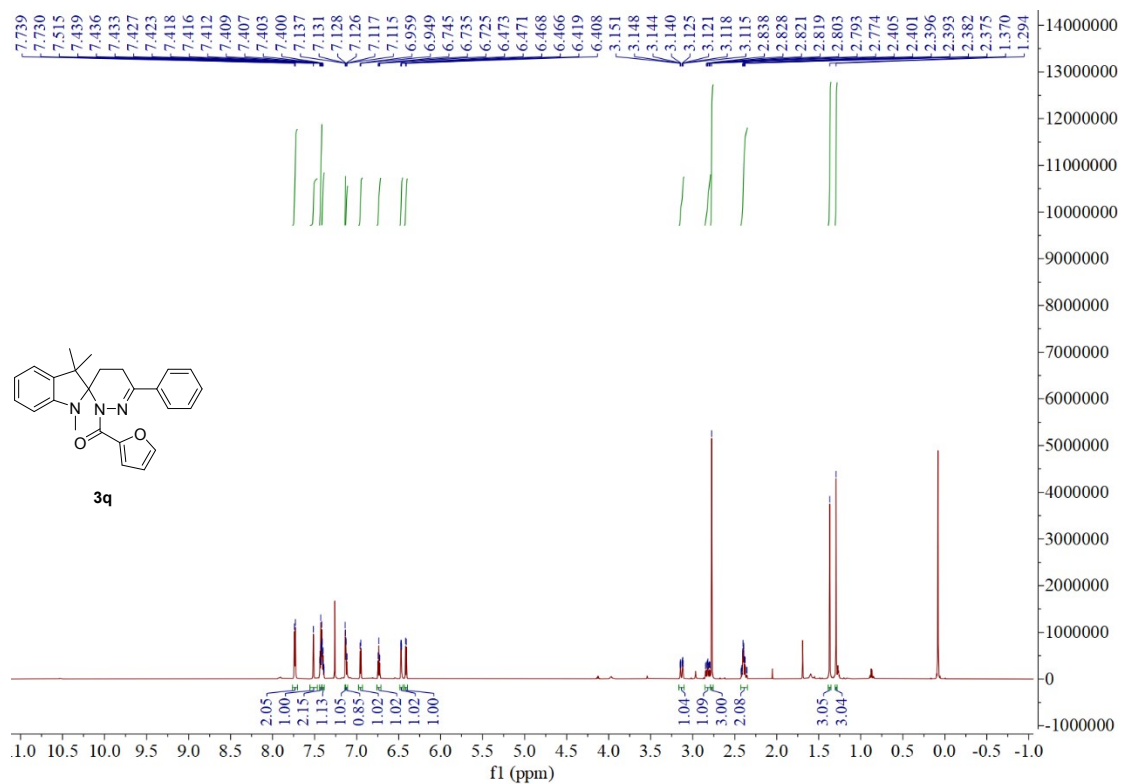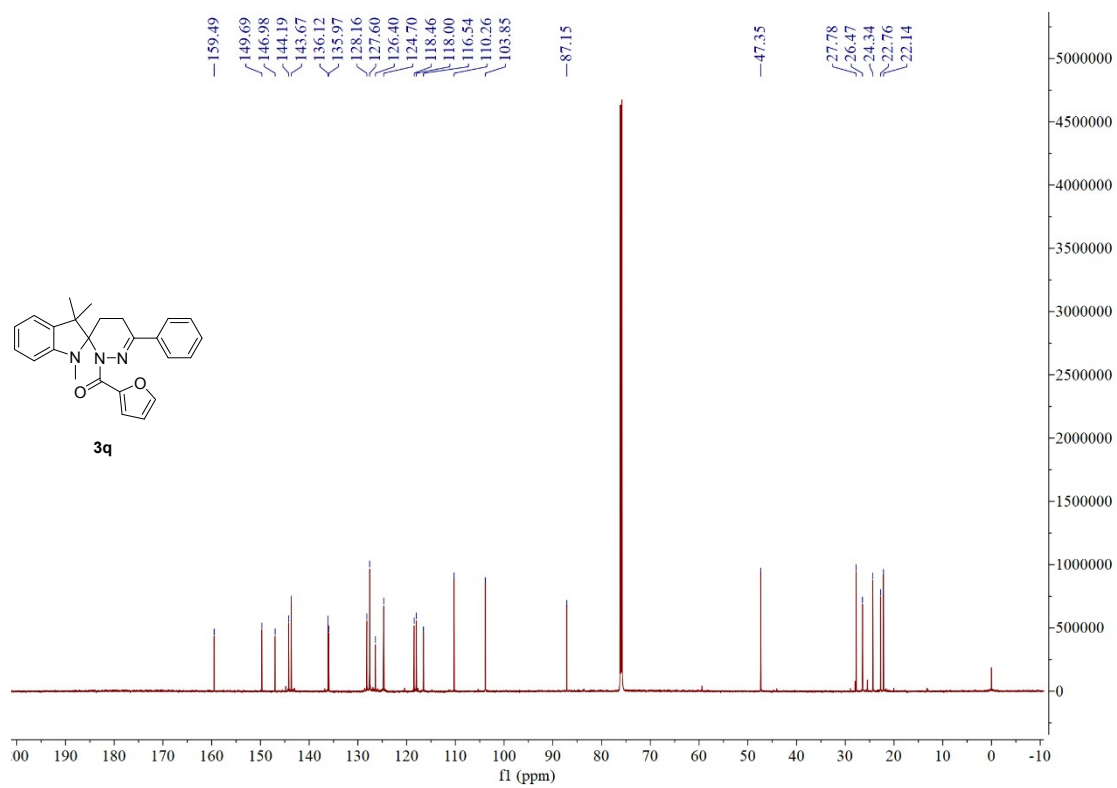

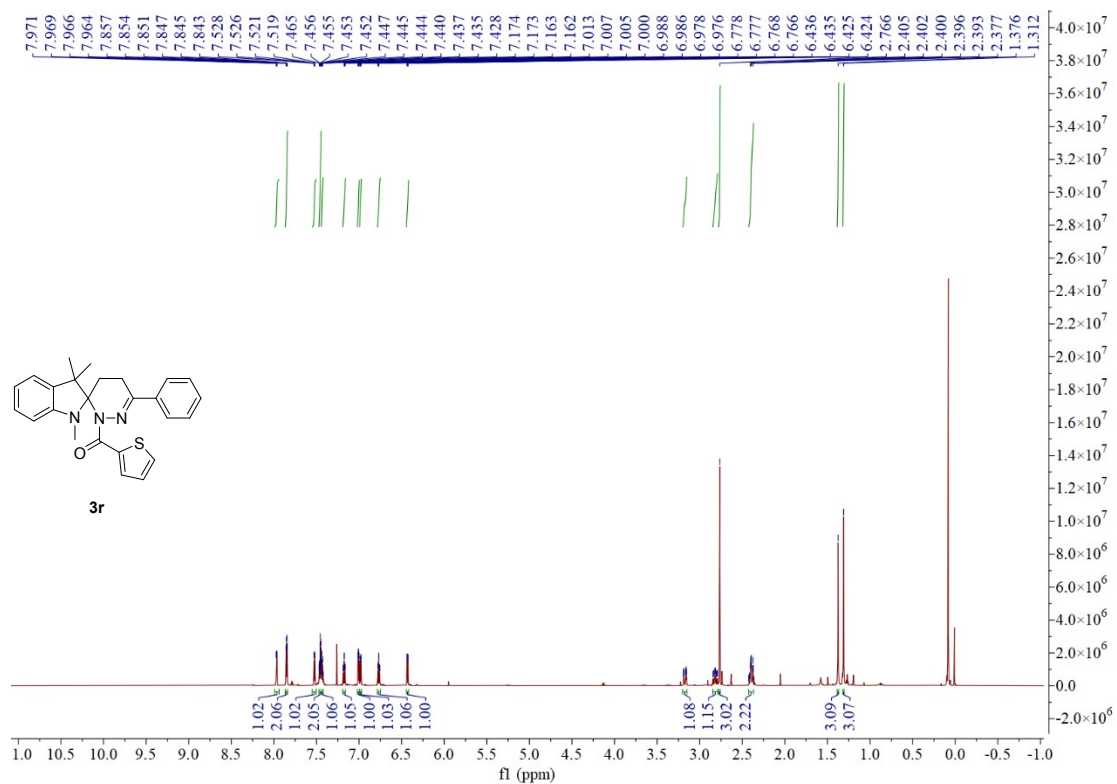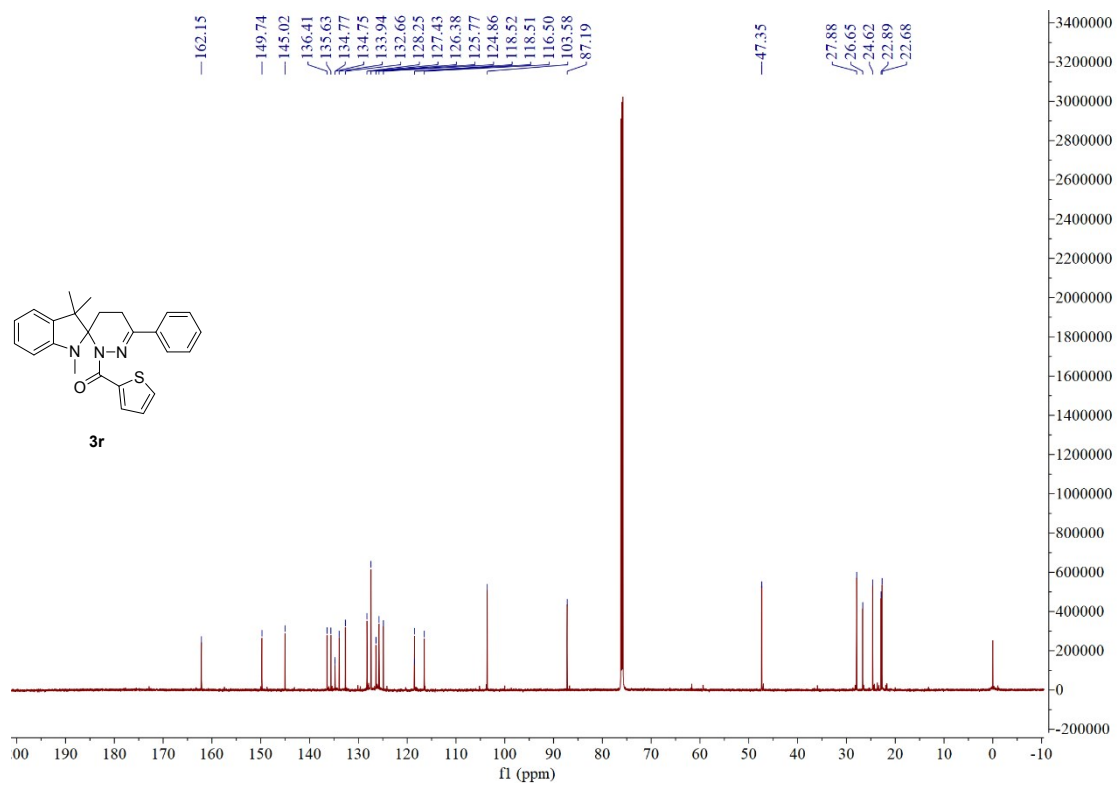

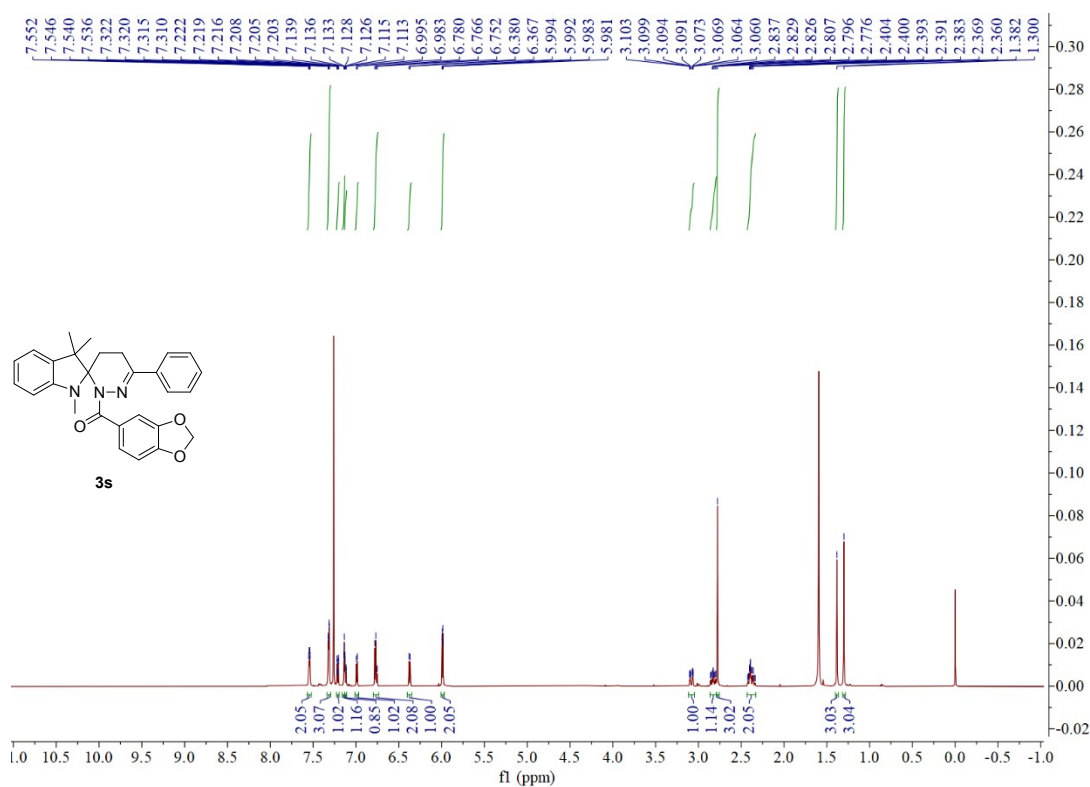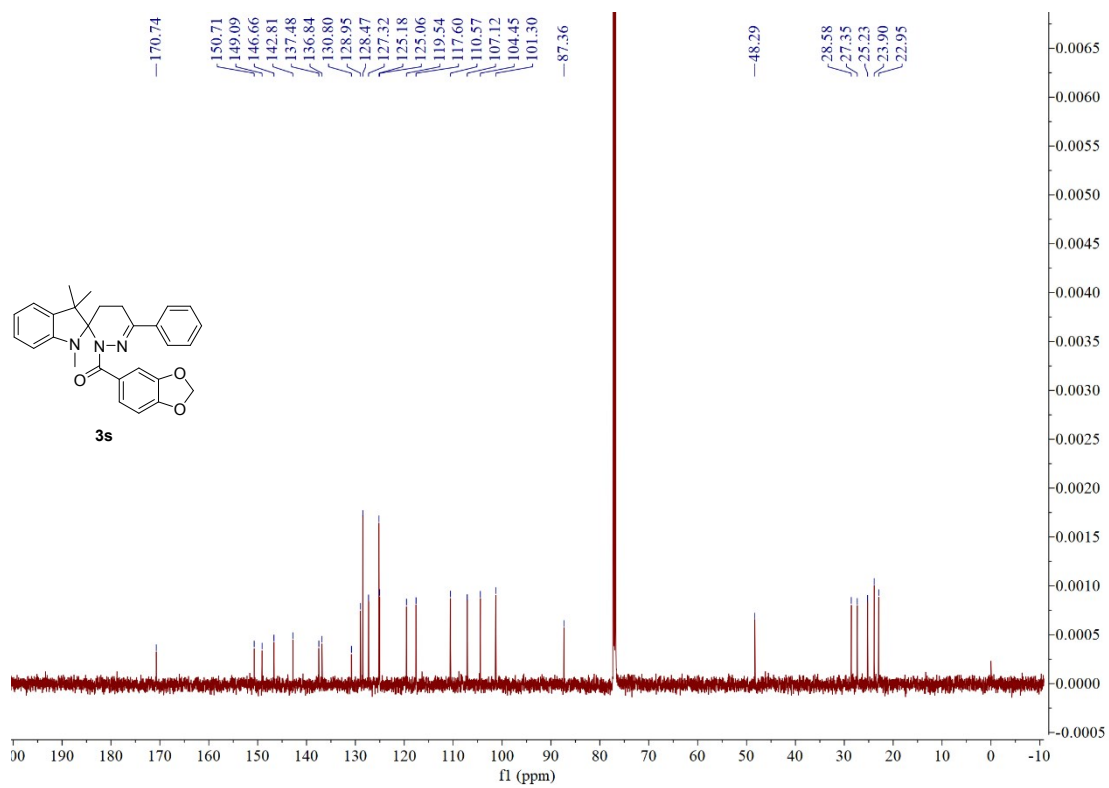

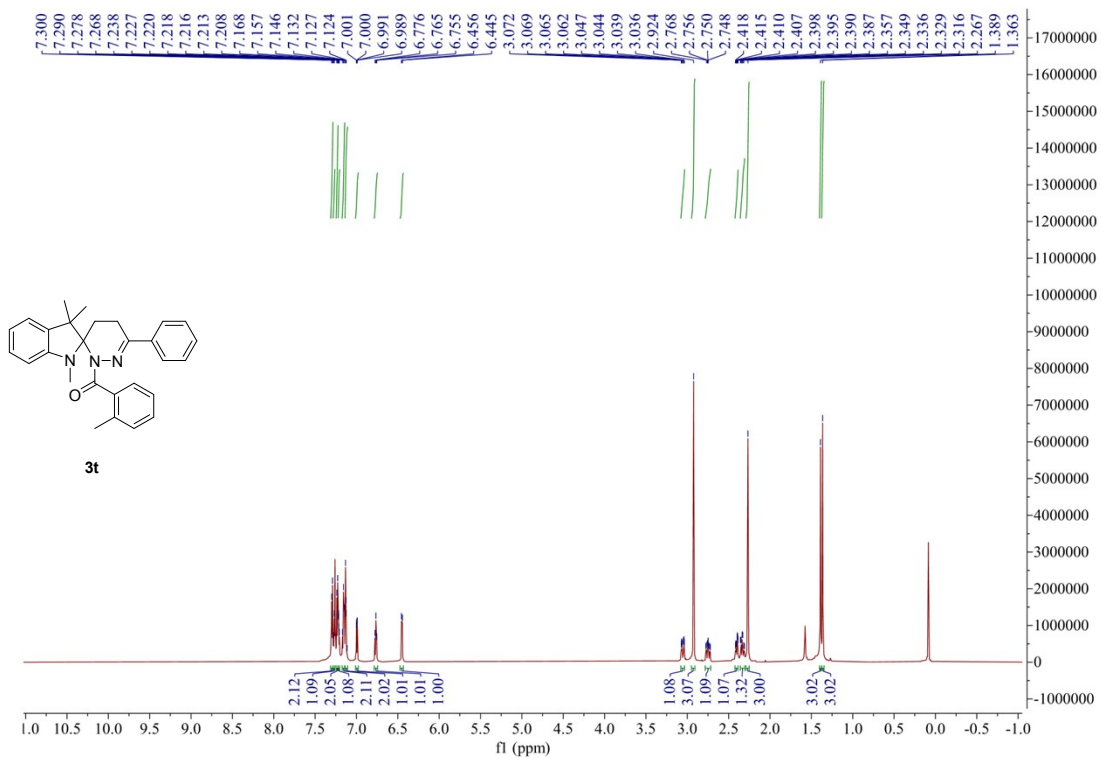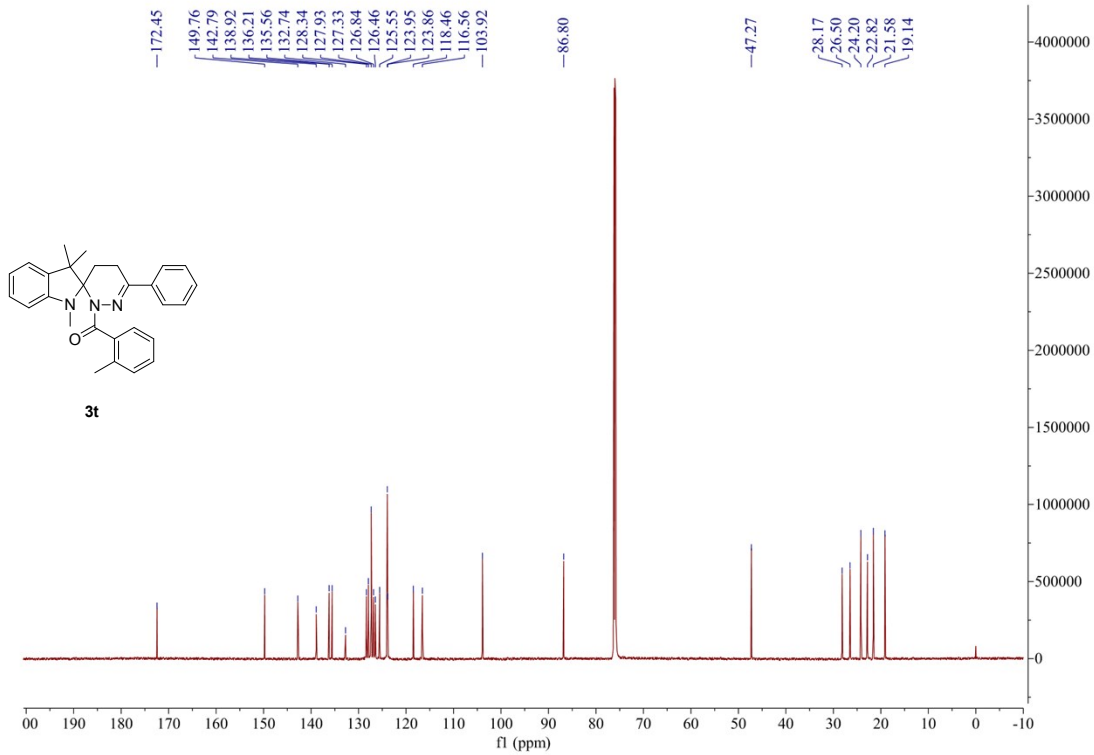

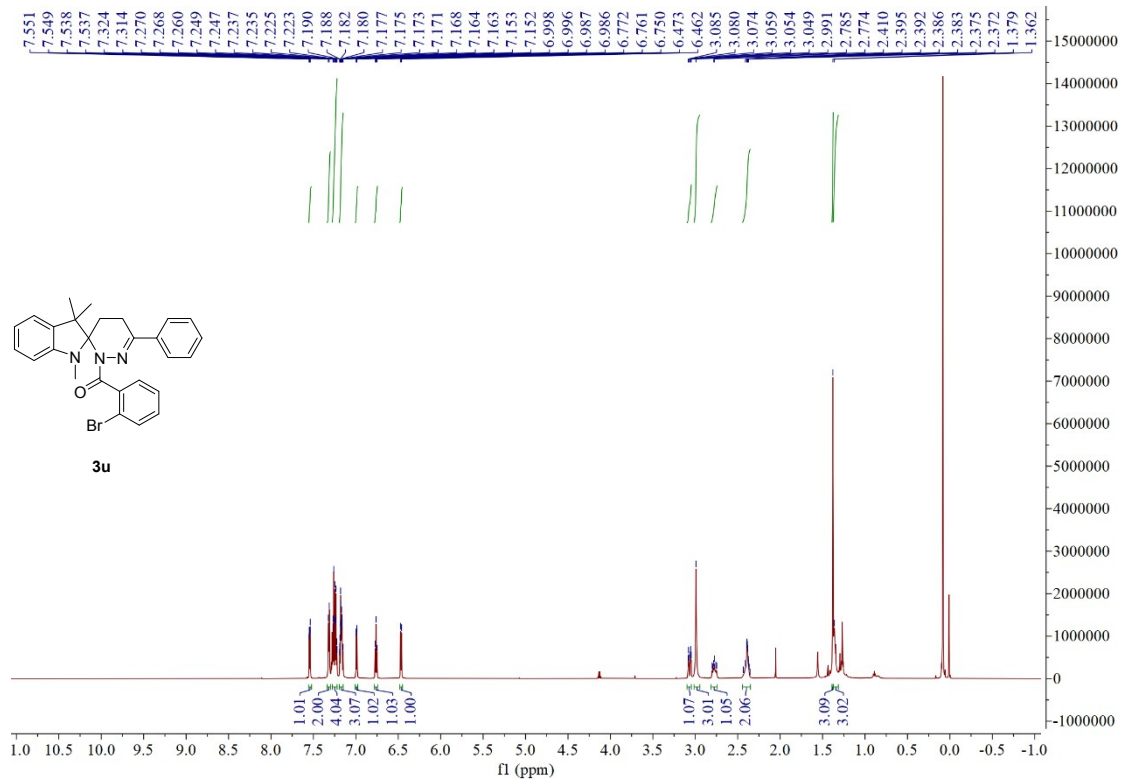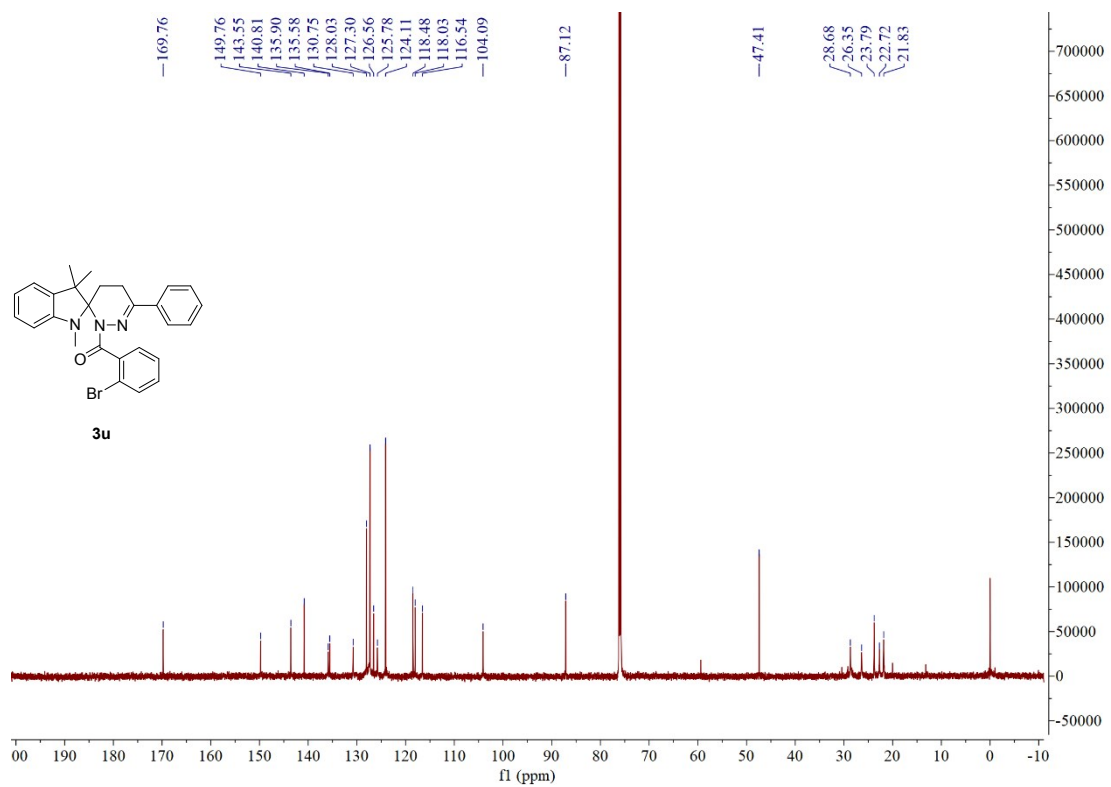

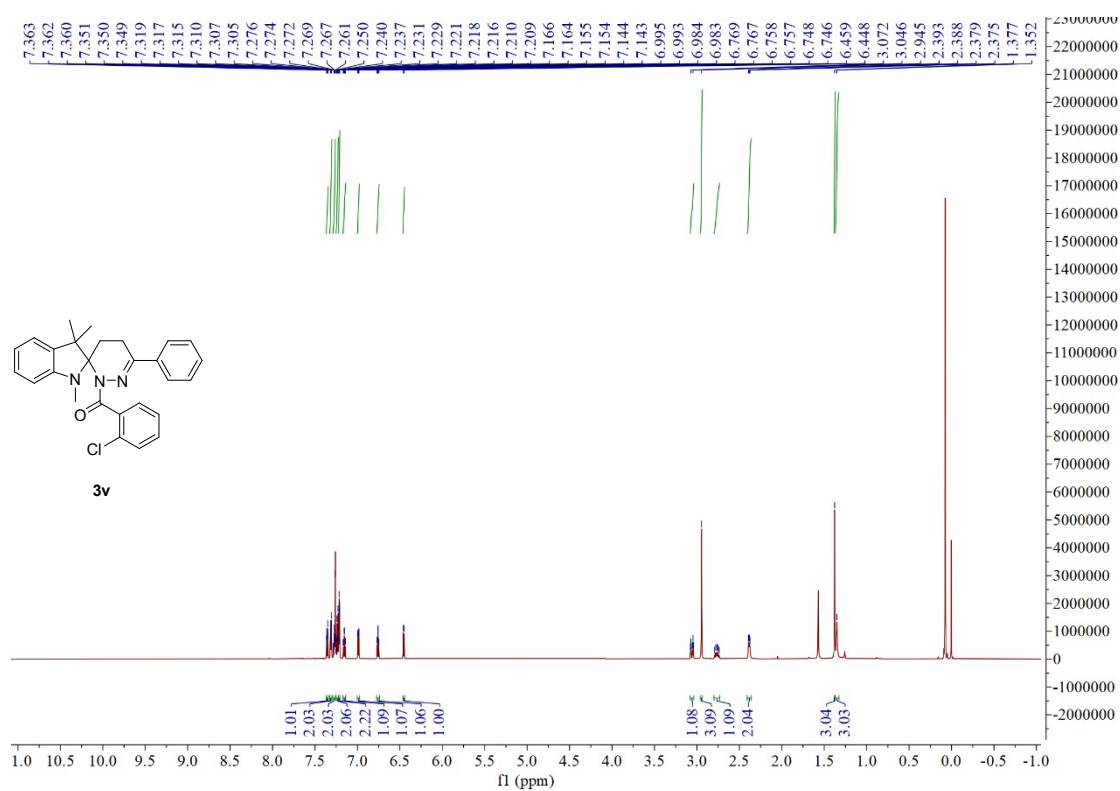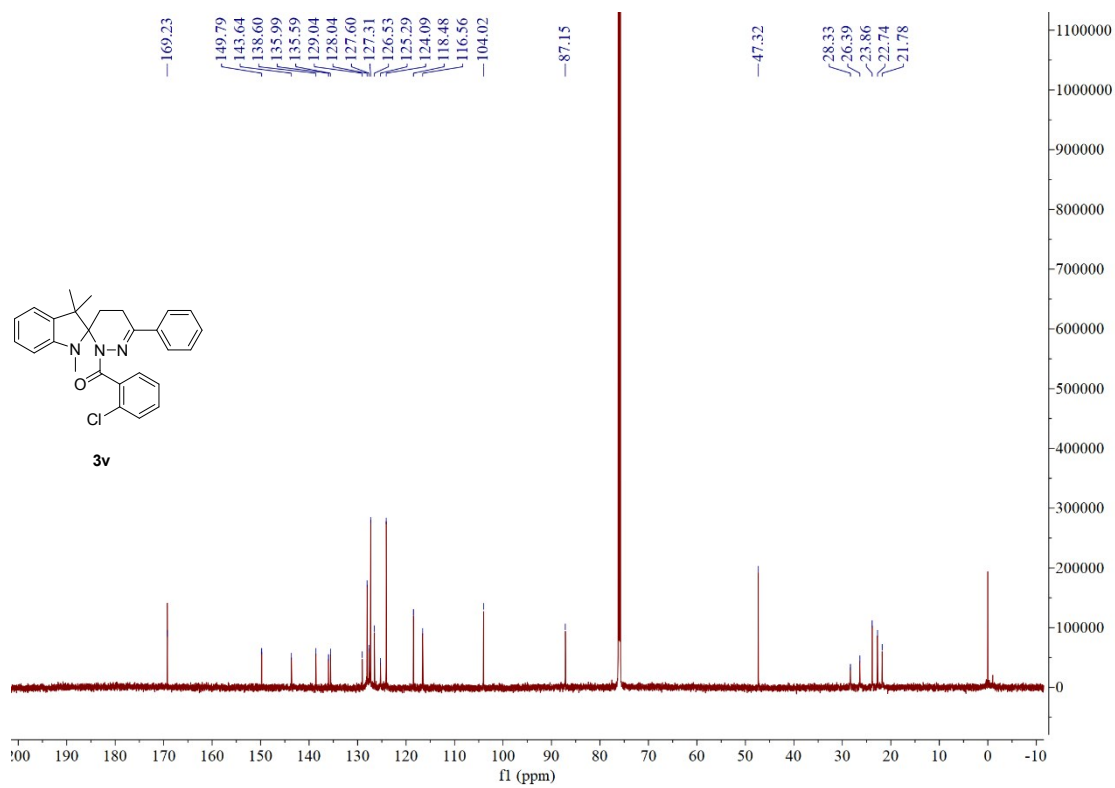

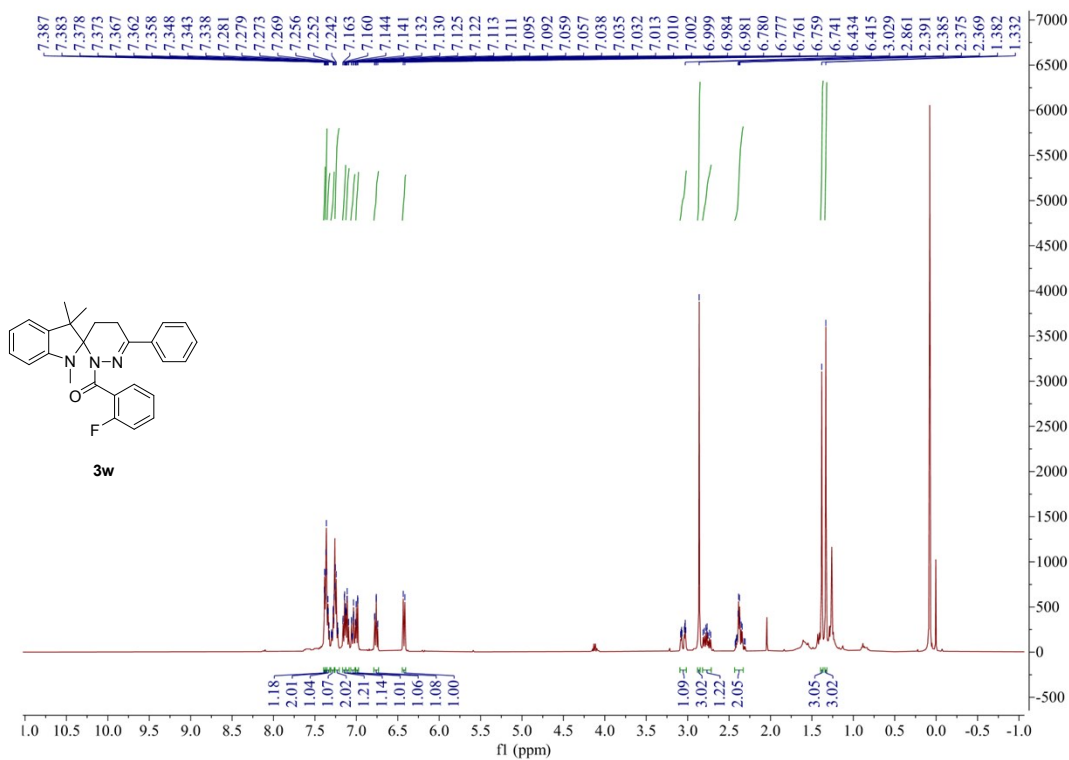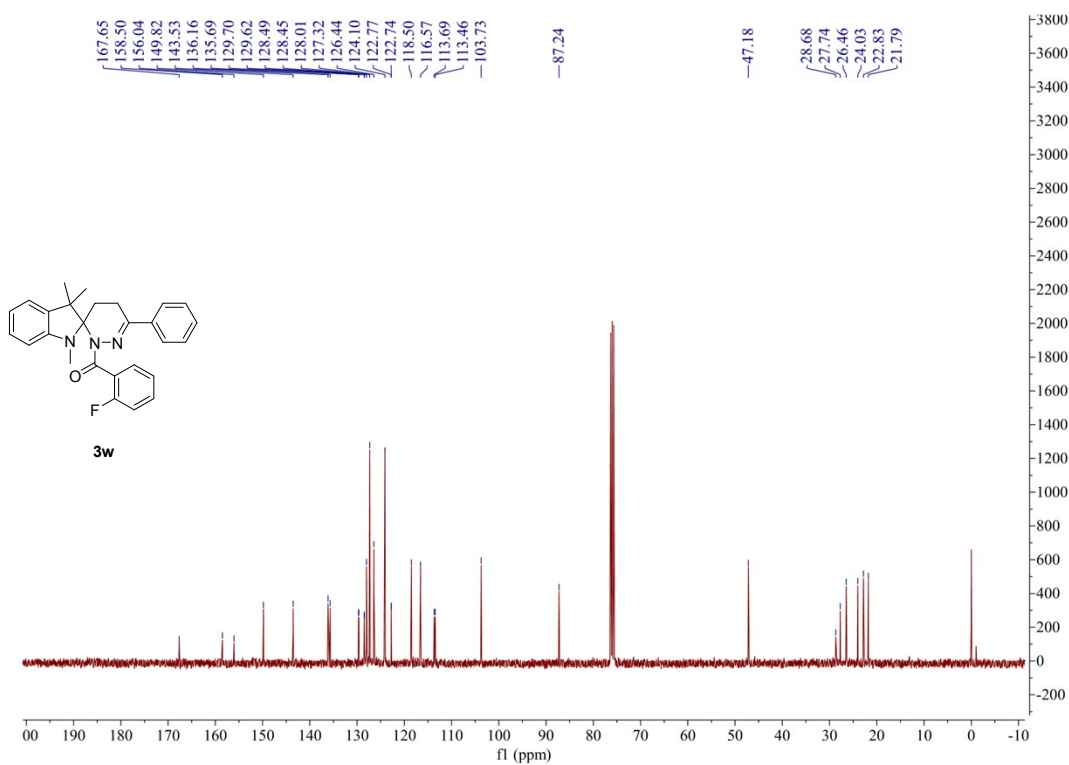

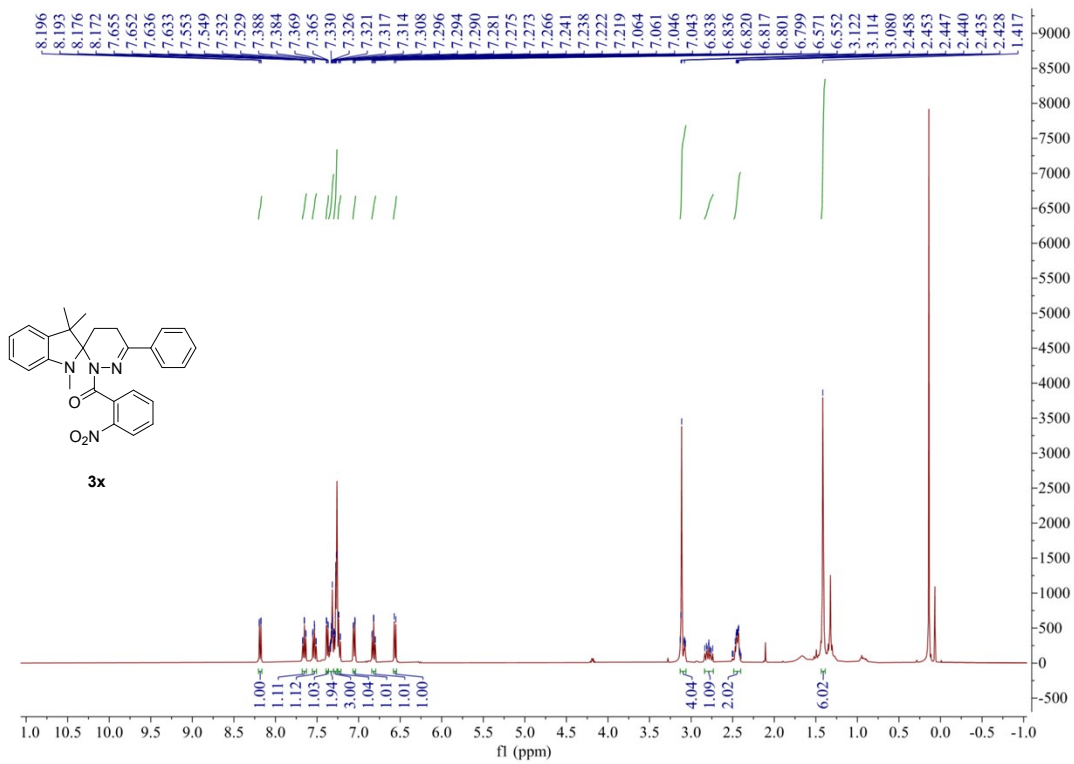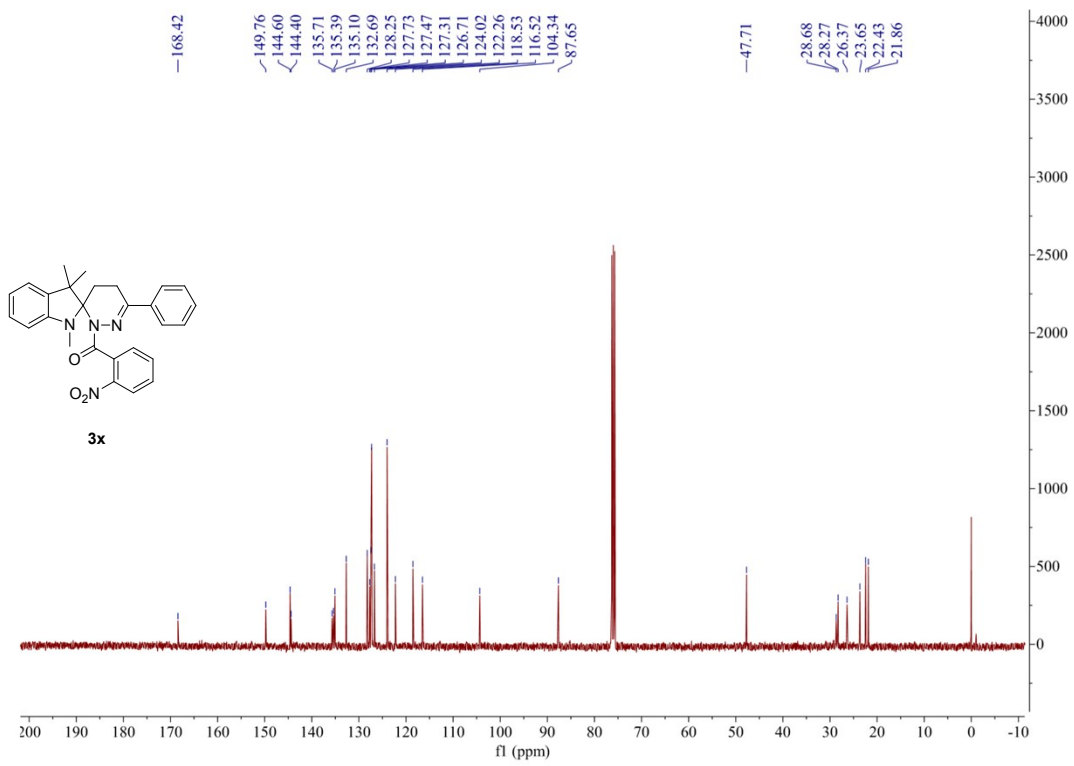



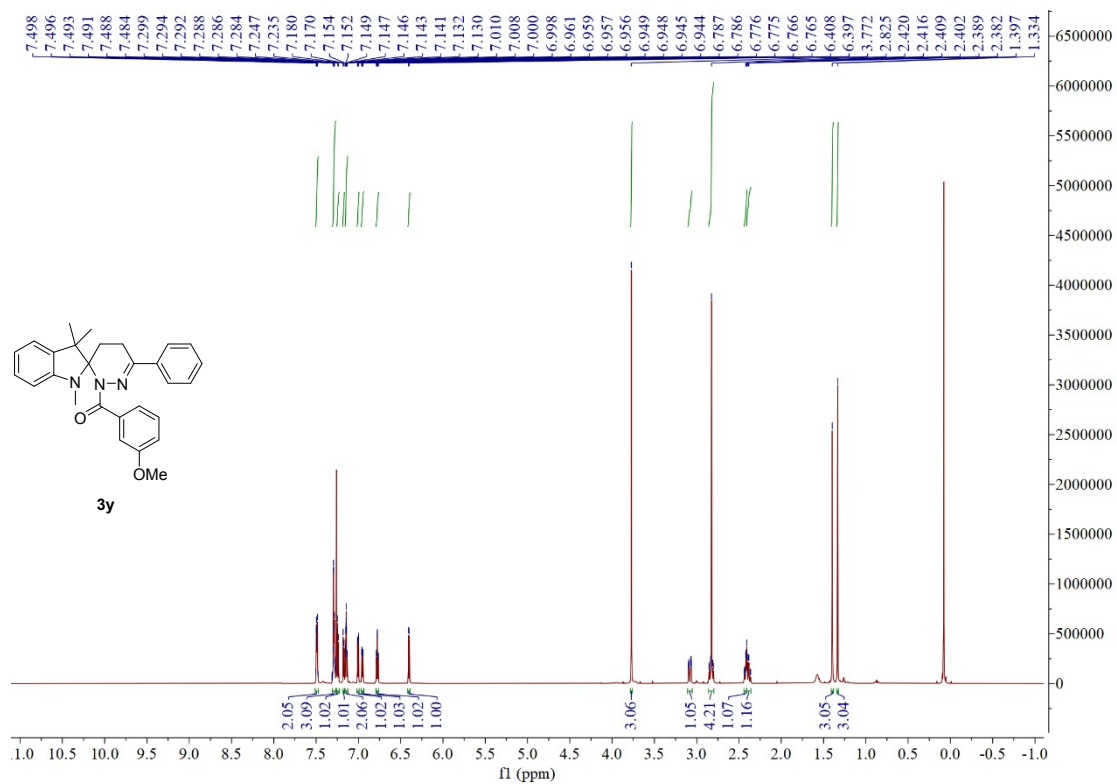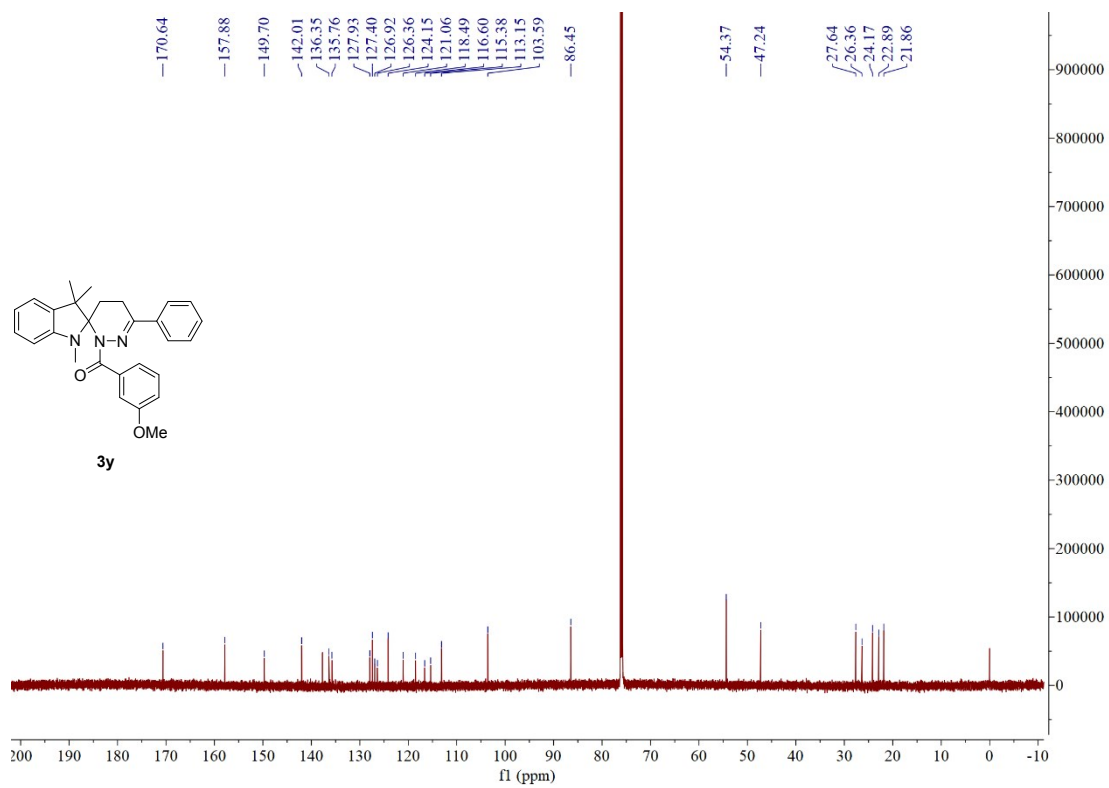

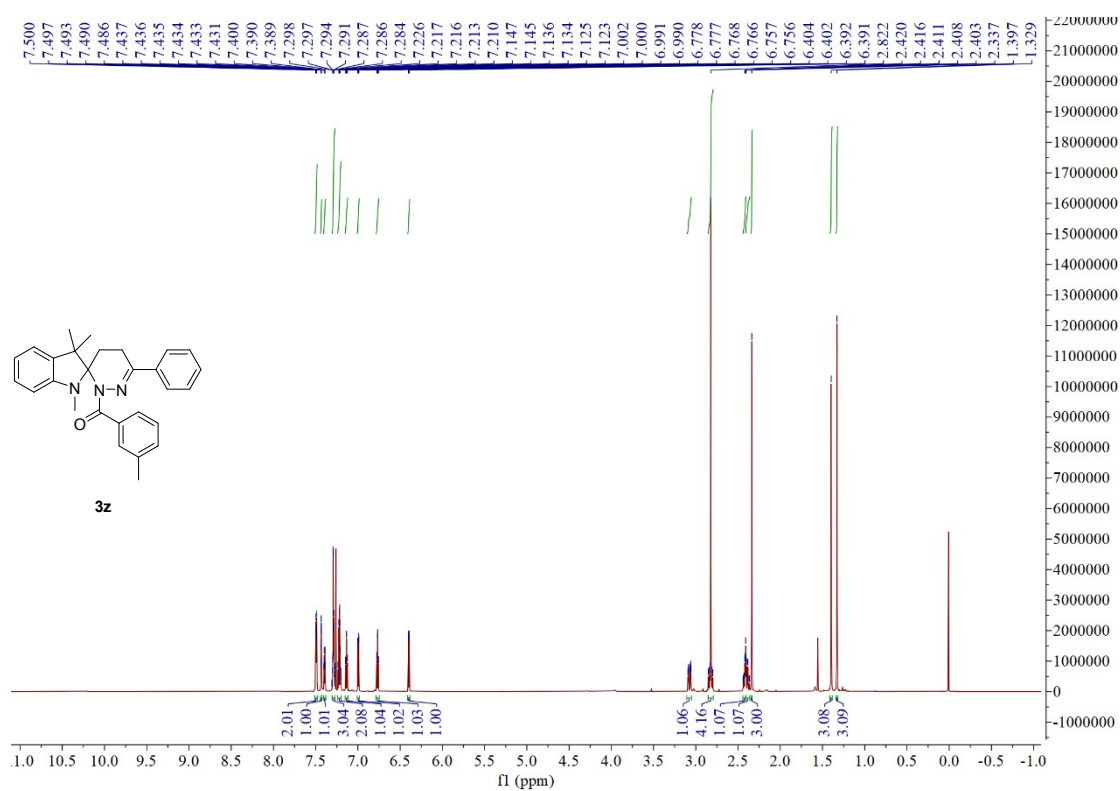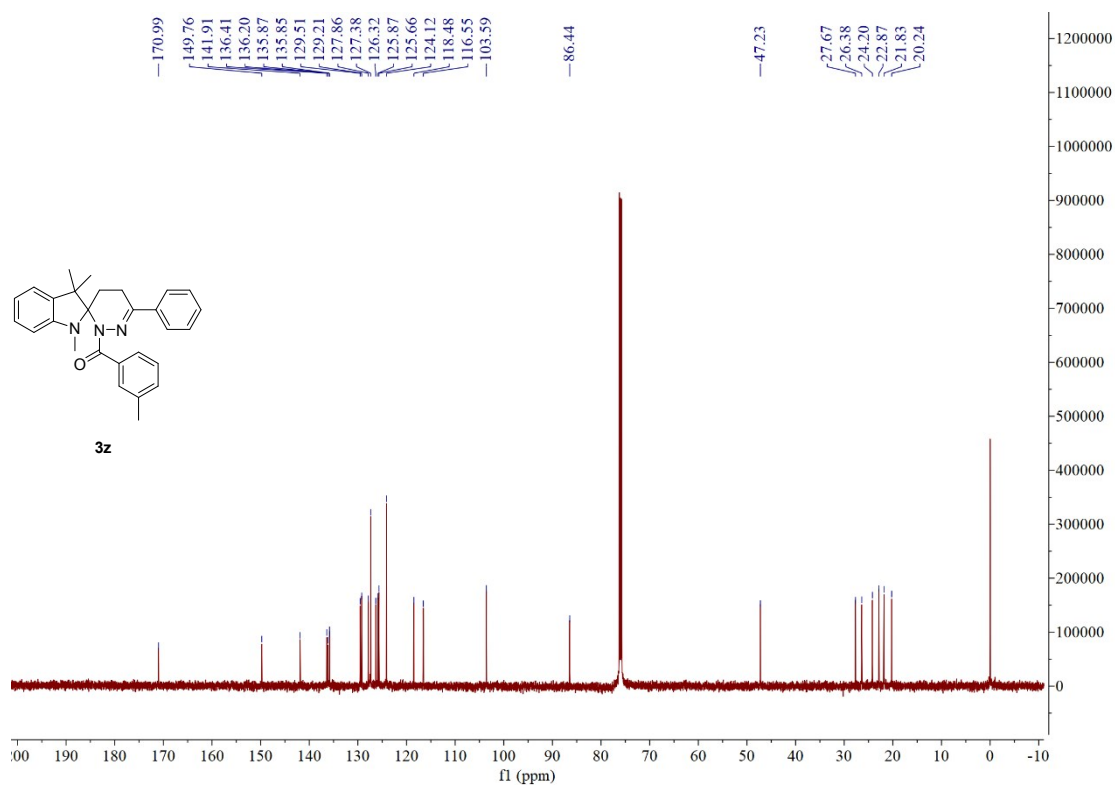

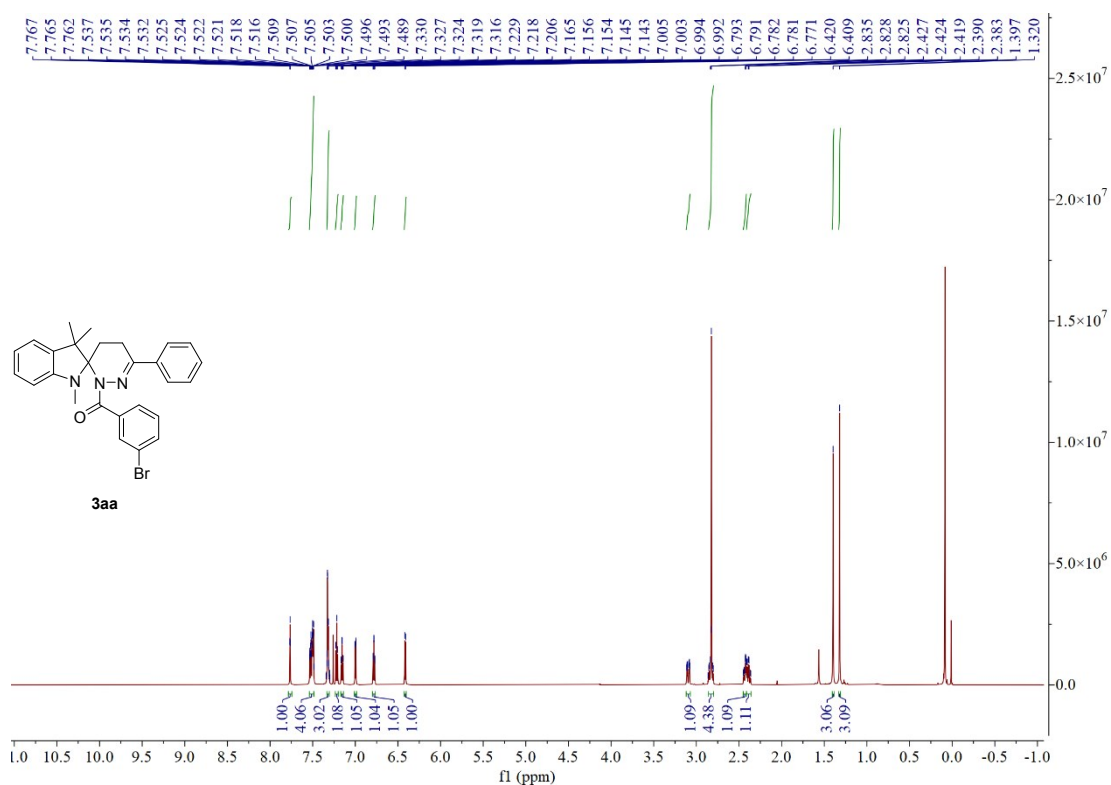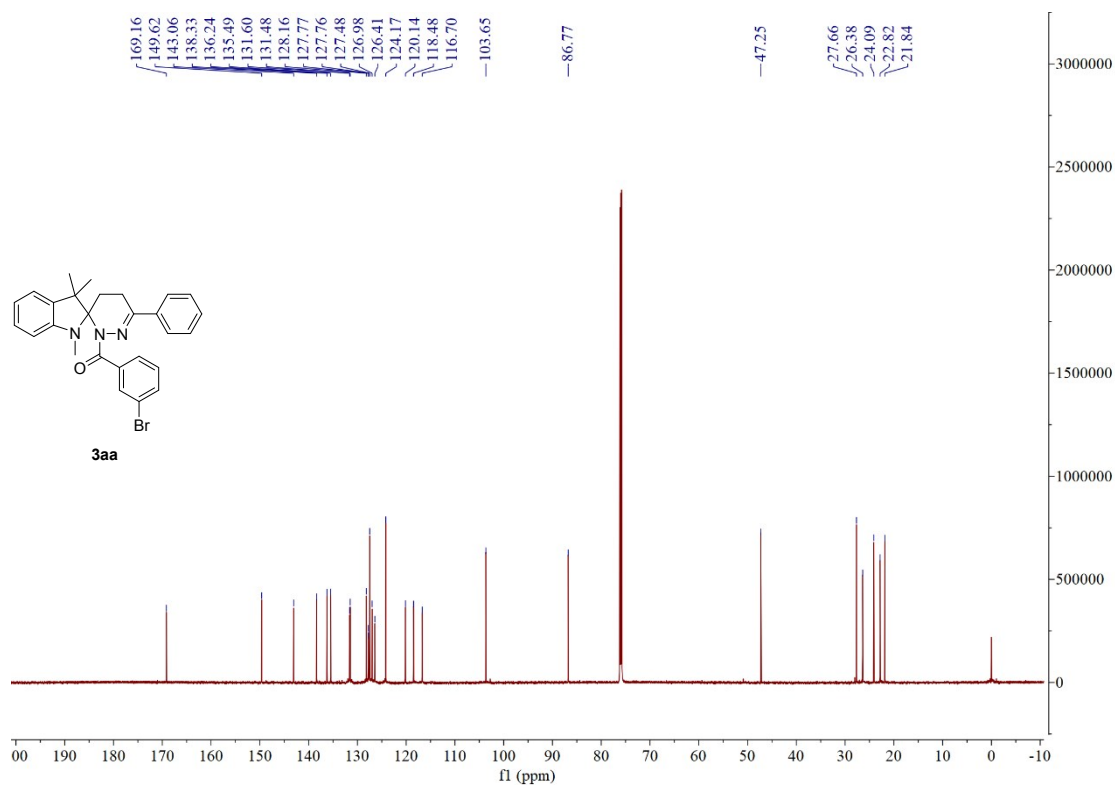

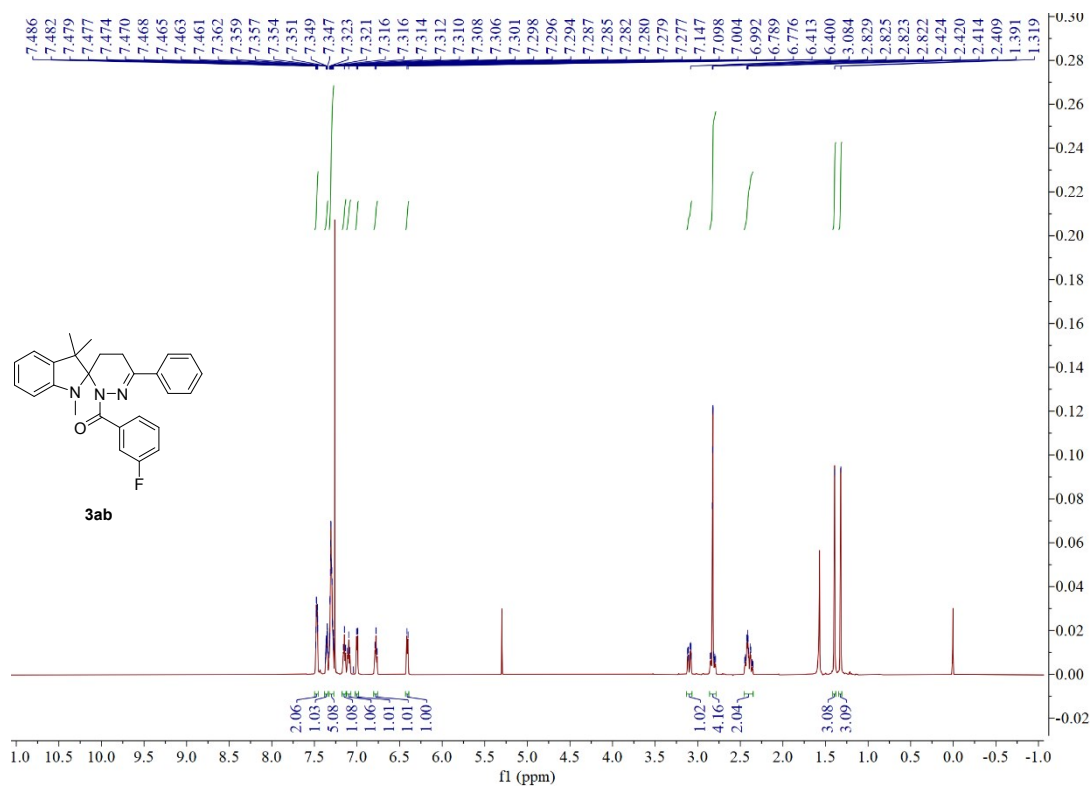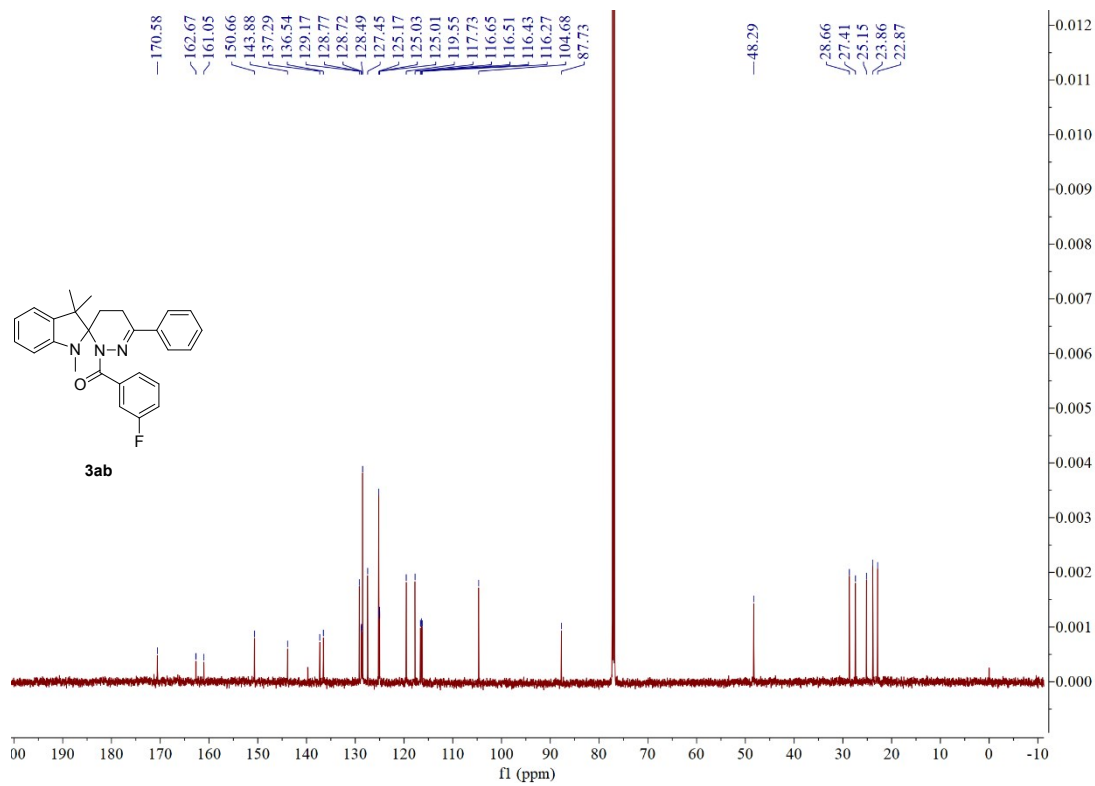

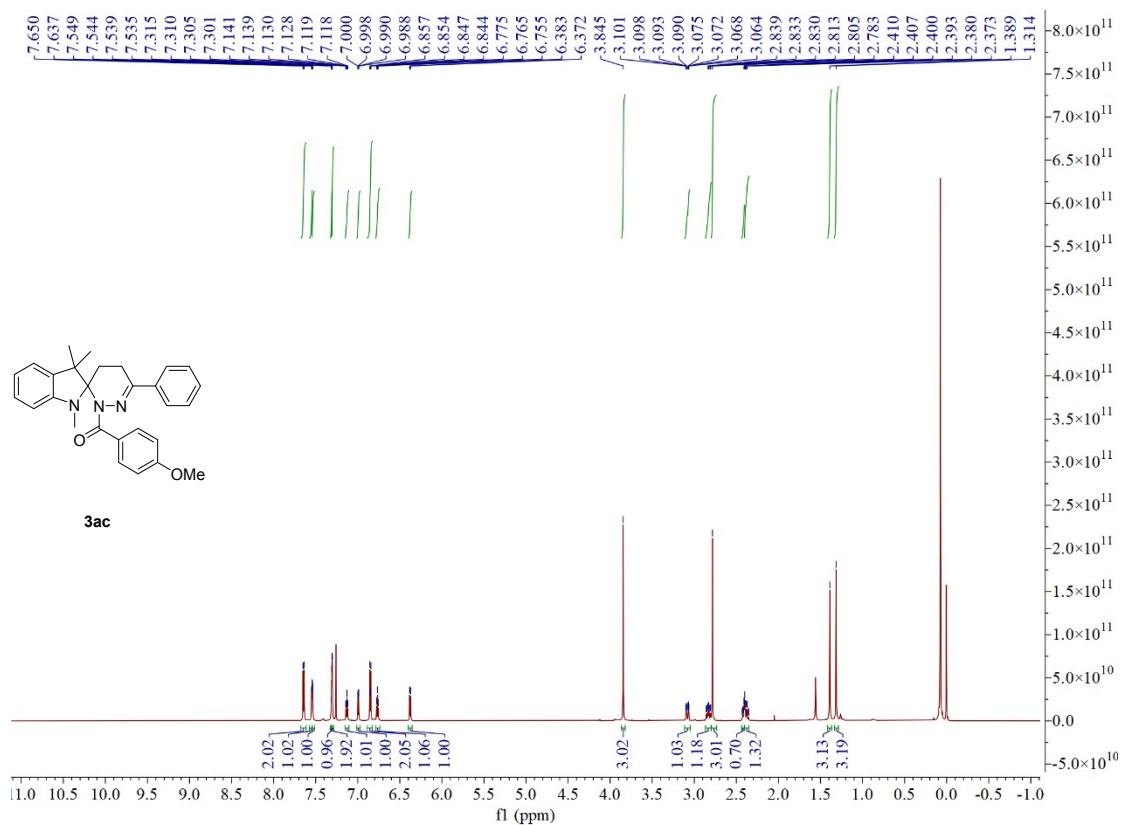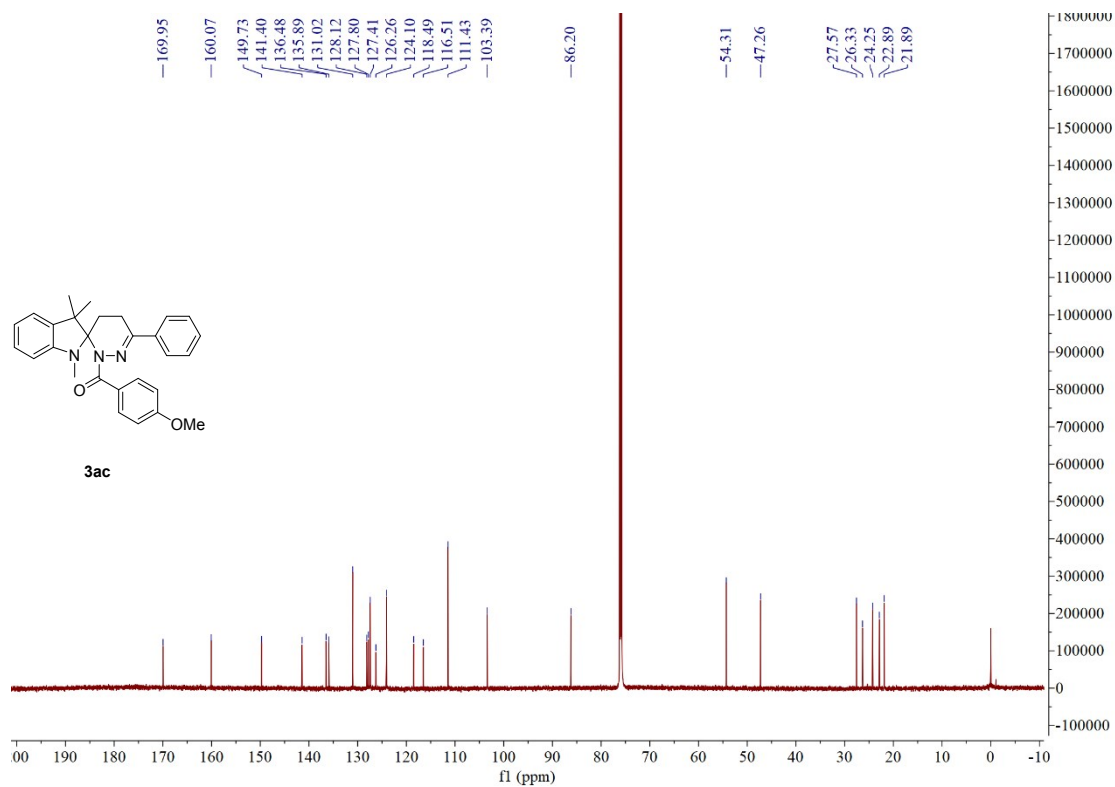

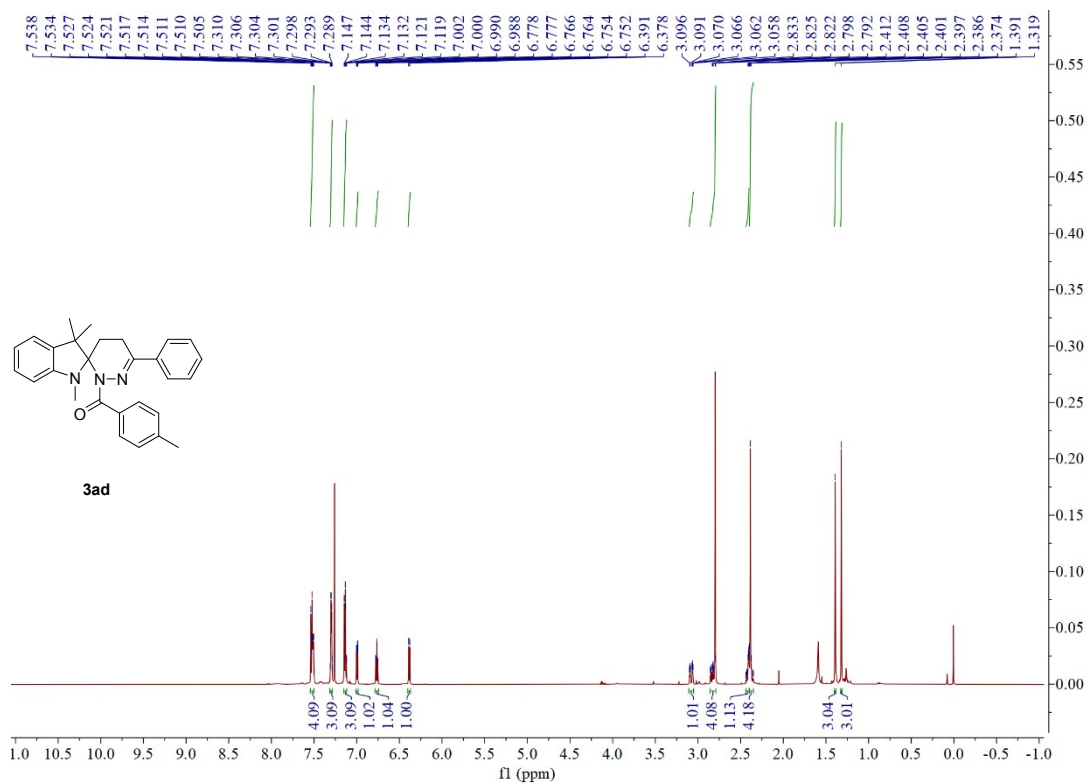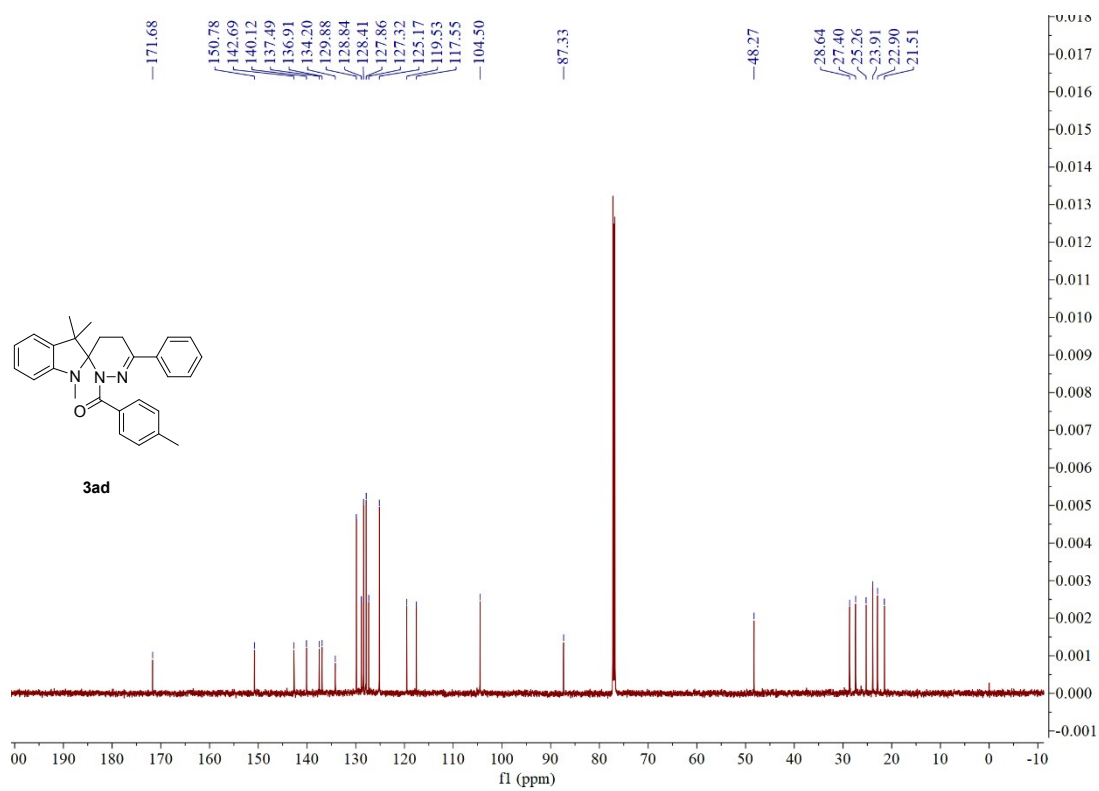

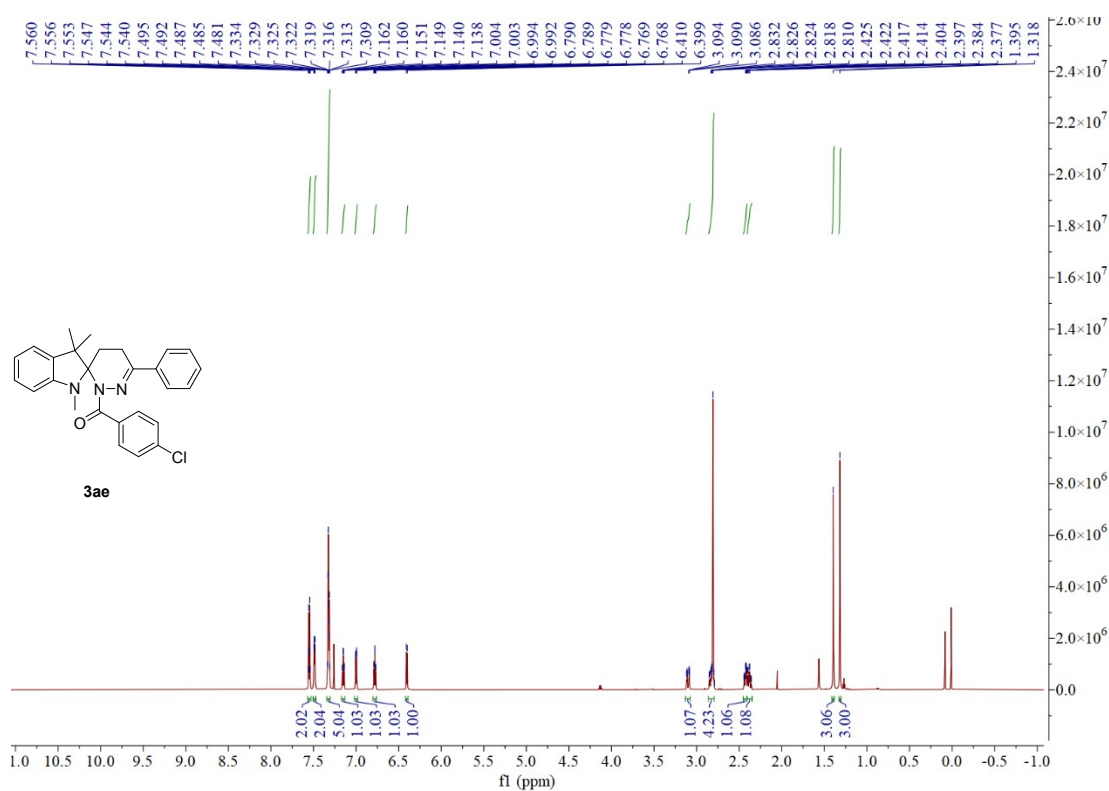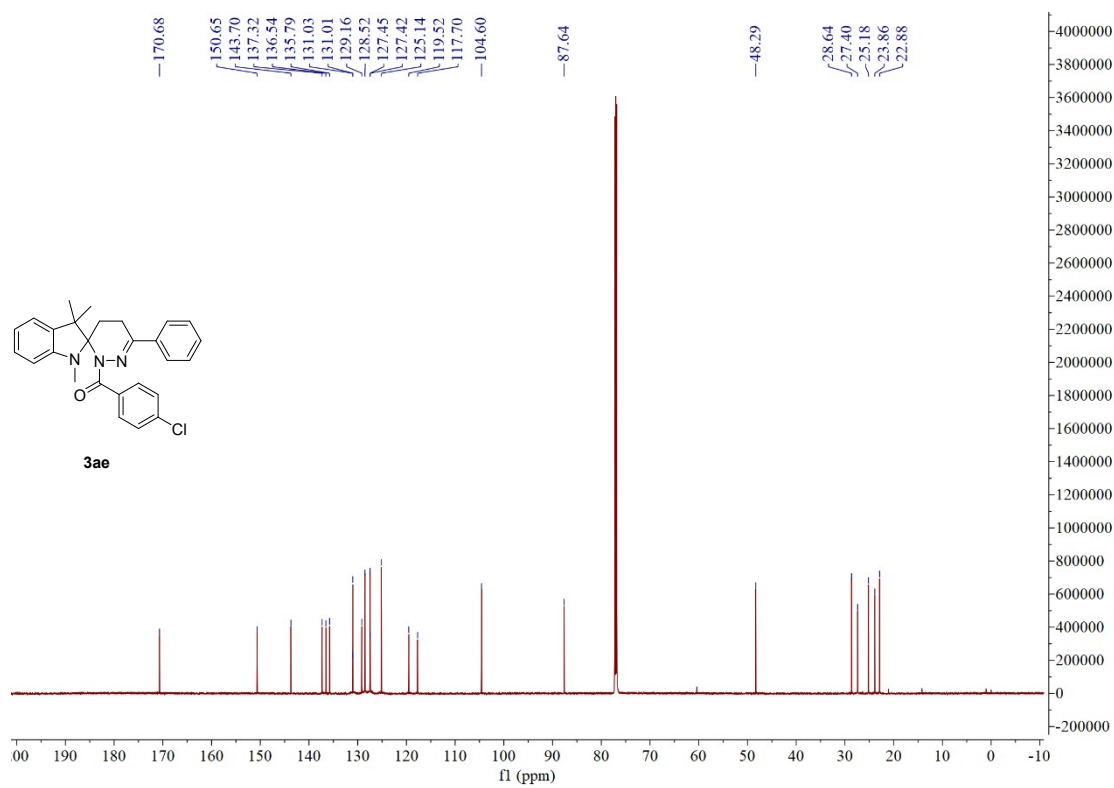

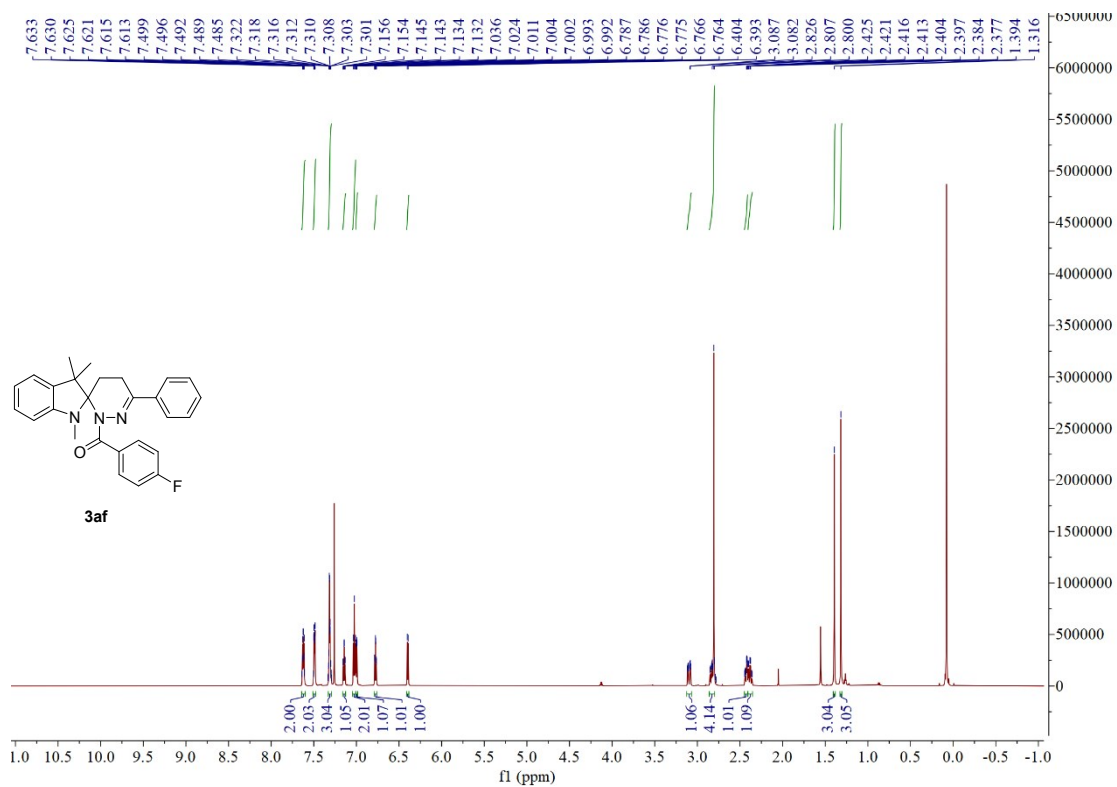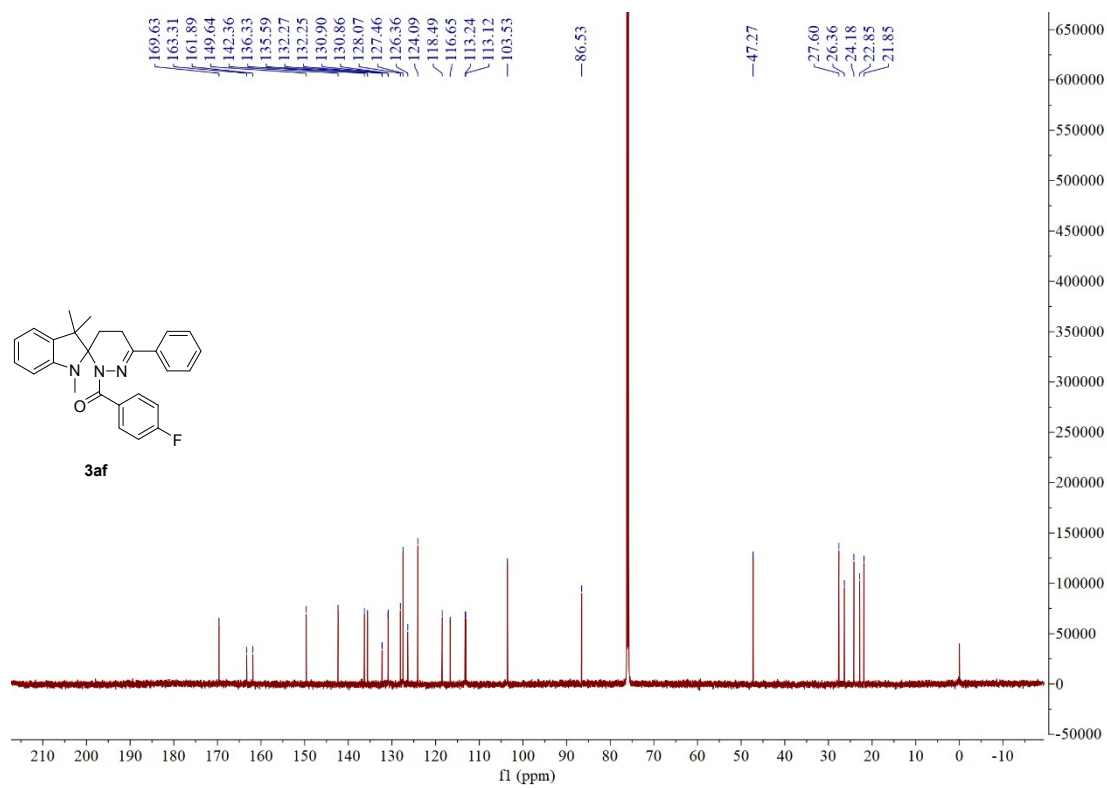



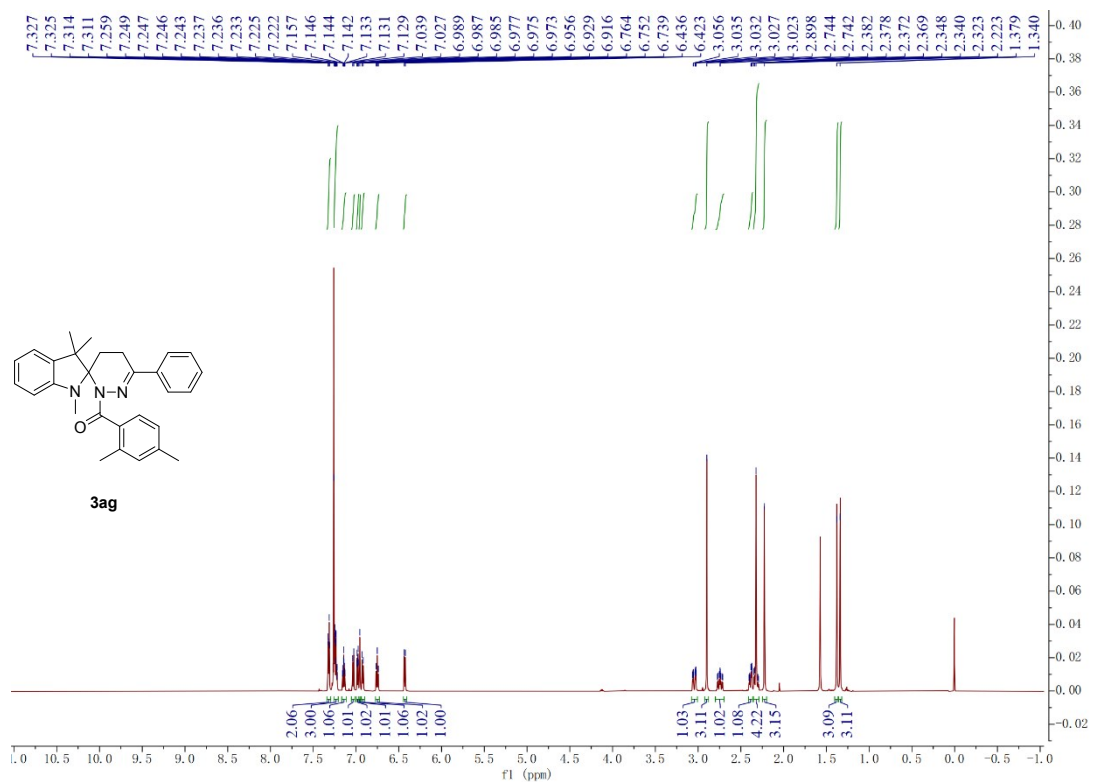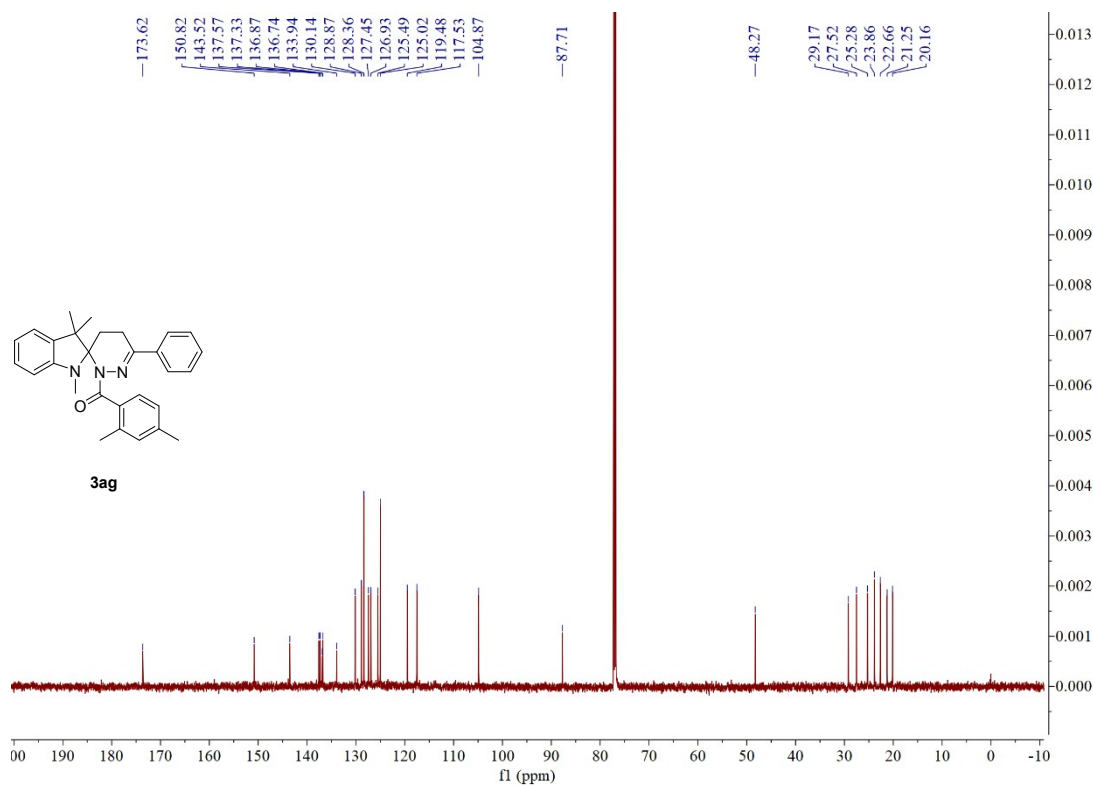

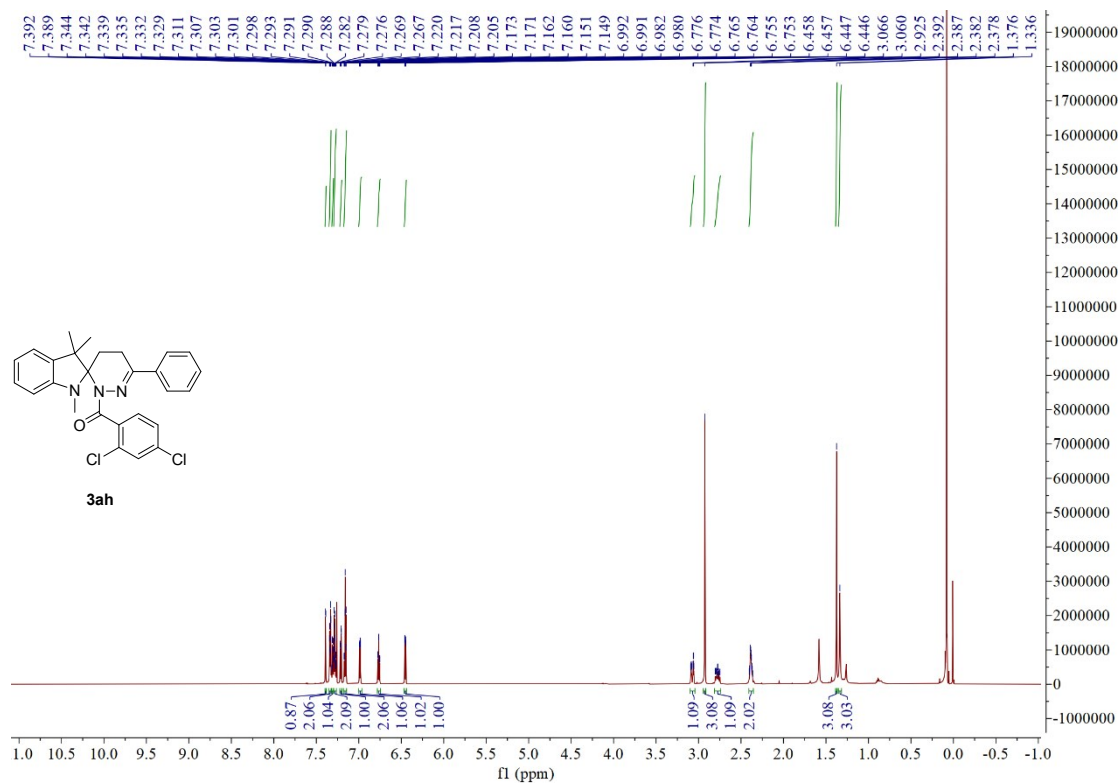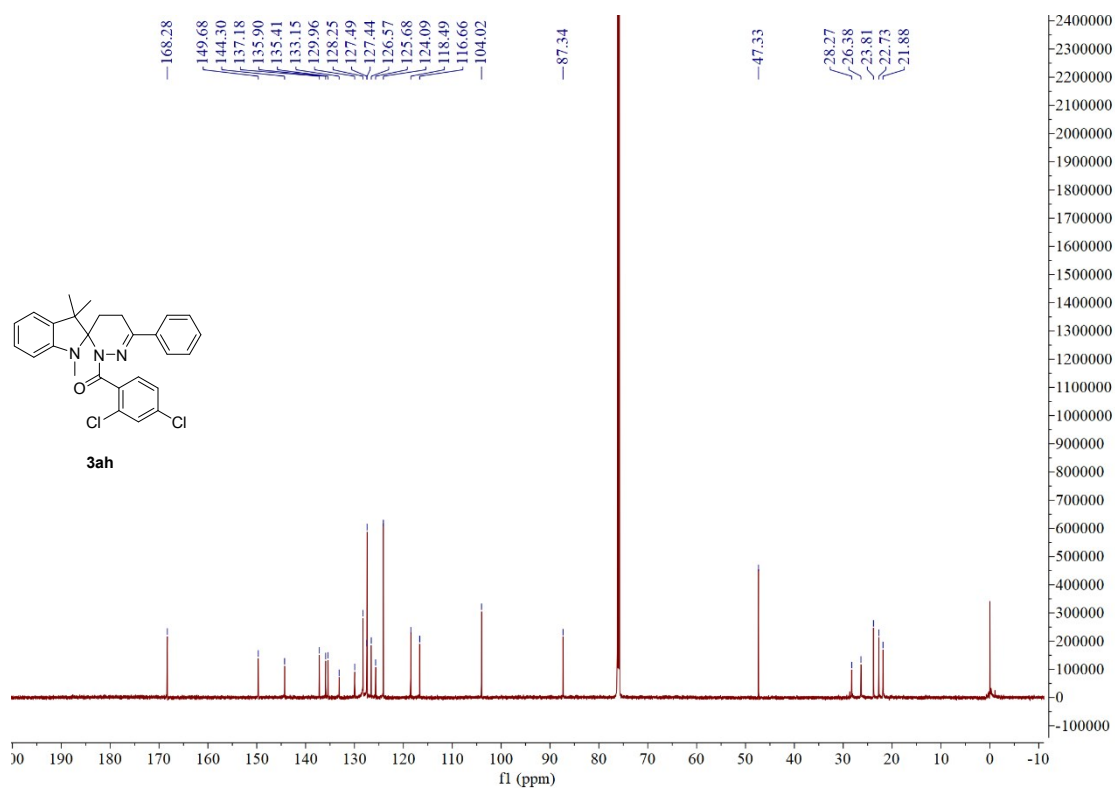

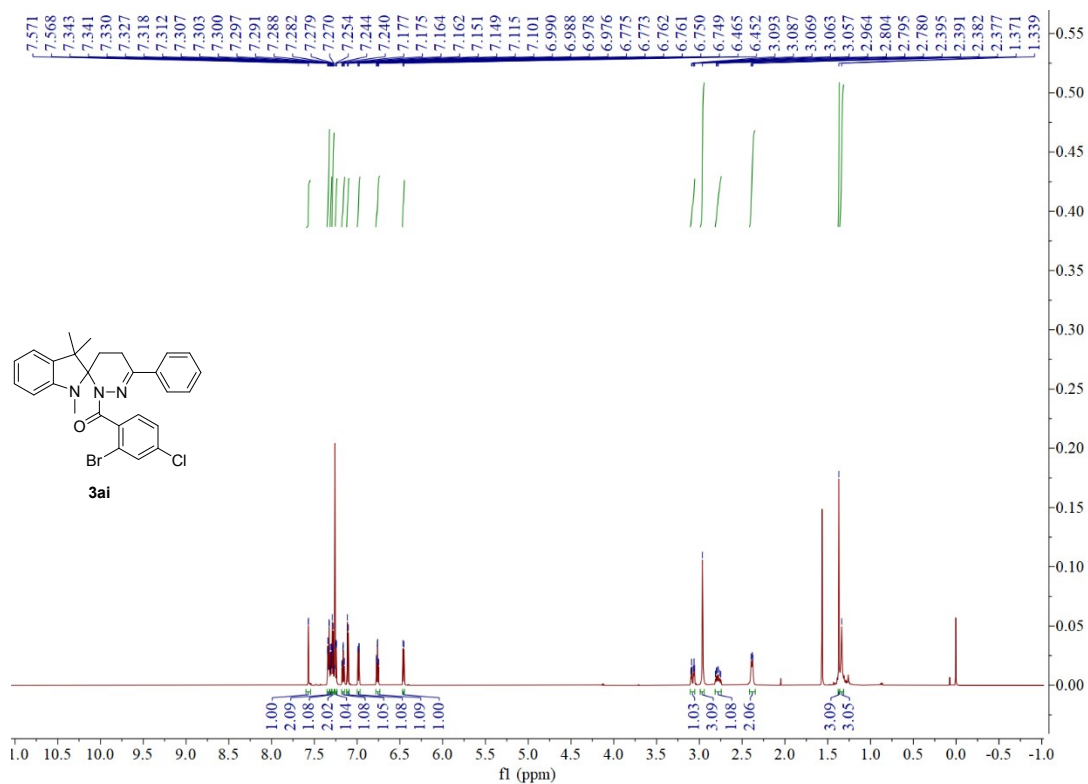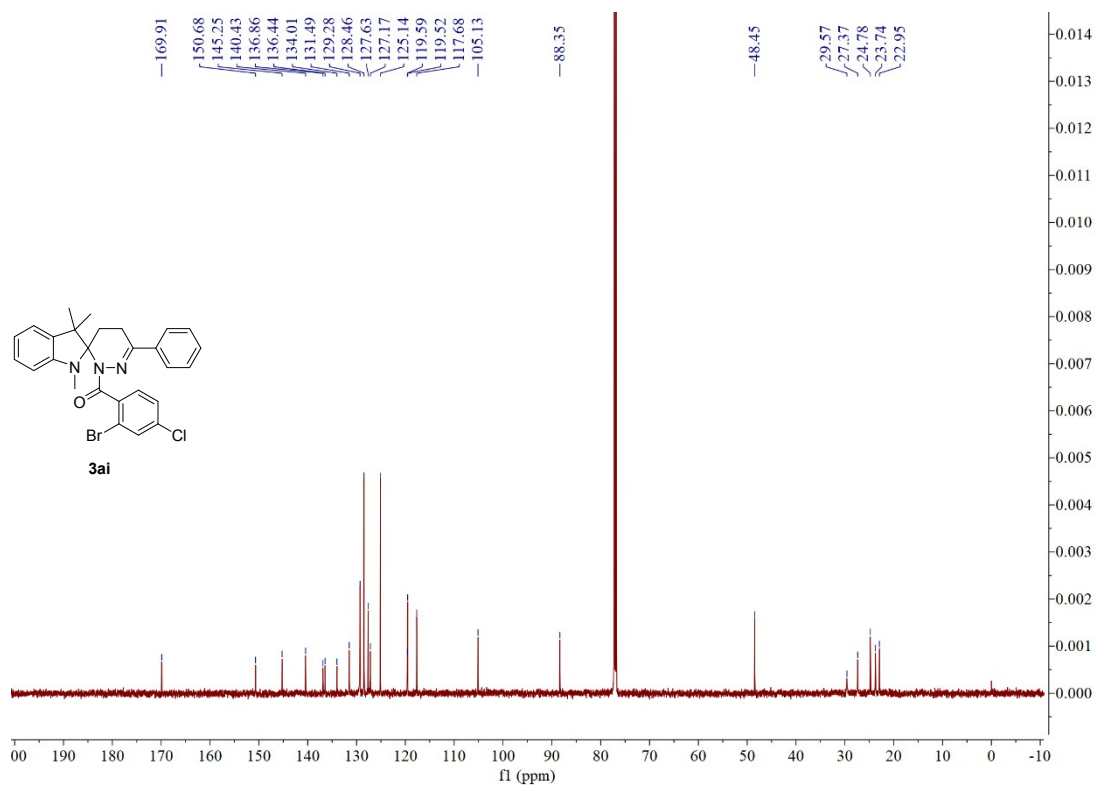

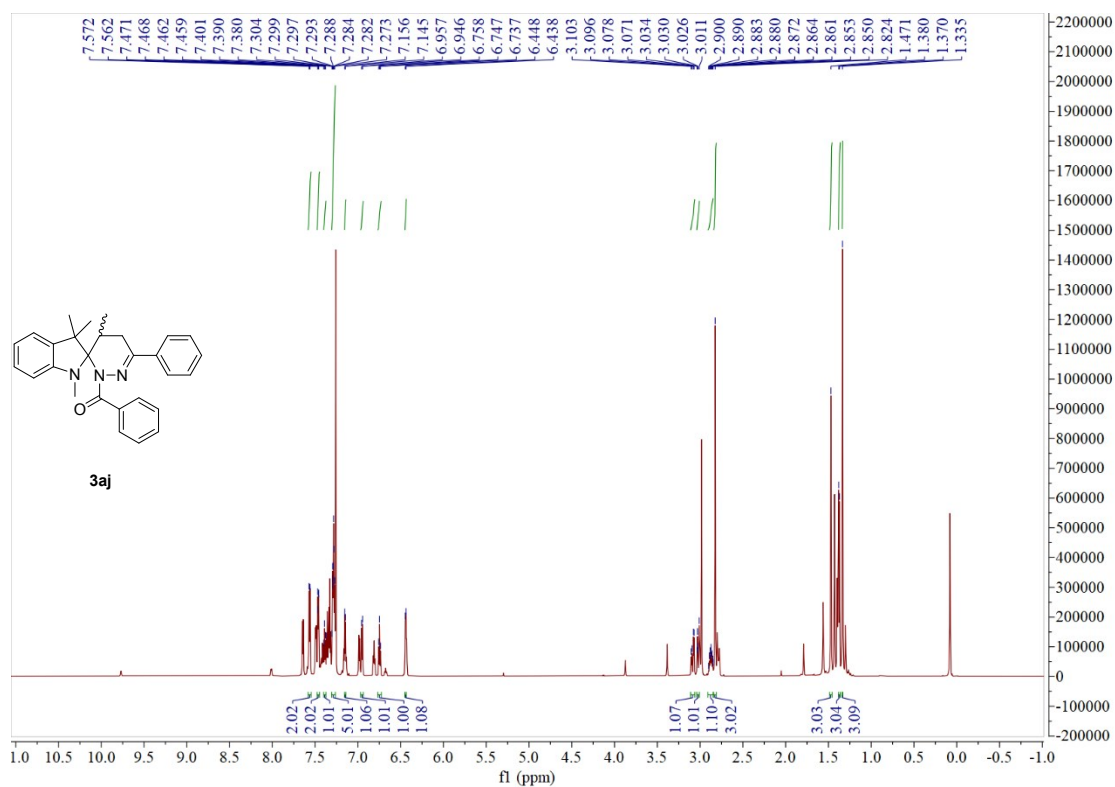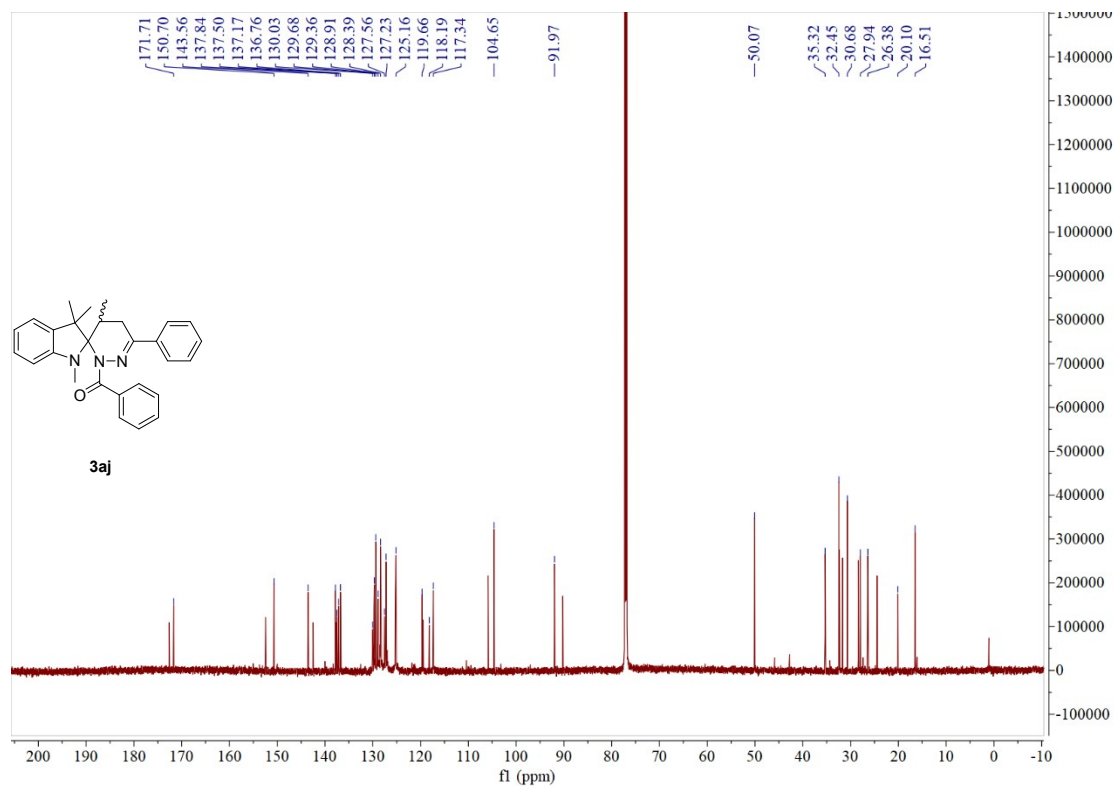

Supplement: d0qo01422b1.pdf [file d0qo01422b1.pdf]
